# Supplementary material for: Enantioselective synthesis of chiral sulfones by hydrogen-bonding/organophotoredox co-catalyzed asymmetric sulfonylation
Source: Royal Society of Chemistry journal article supplement (doi:10.1039/d3qo00324h), 2023-01-01

## Supporting Information

# Enantioselective synthesis of chiral sulfones by hydrogen-bonding/organophotoredox co-catalyzed asymmetric sulfonylation

Jian-Qiang Chen,<sup>a</sup> Qiangwei Li,<sup>a</sup> Wenlin Xie<sup>b</sup> and Jie Wu<sup>\*a,c,d</sup>

<sup>a</sup> School of Pharmaceutical and Chemical Engineering & Institute for Advanced Studies, Taizhou University, 1139 Shifu Avenue, Taizhou 318000, China.

<sup>b</sup> School of Chemistry and Chemical Engineering, Hunan University of Science and Technology, Xiangtan 411201, China.

<sup>c</sup> State Key Laboratory of Organometallic Chemistry, Shanghai Institute of Organic Chemistry, Chinese Academy of Sciences, Shanghai 200032, China.

<sup>d</sup> School of Chemistry and Chemical Engineering, Henan Normal University, Xinxiang 453007, China.

Corresponding author: [jie\\_wu@fudan.edu.cn](mailto:jie_wu@fudan.edu.cn)

## Table of Contents

|                                                             |     |
|-------------------------------------------------------------|-----|
| 1. General Information.....                                 | S2  |
| 2. General experimental procedure.....                      | S2  |
| 3. Substrate scopes with limitations.....                   | S3  |
| 4. Devices for the photocatalytic reactions .....           | S5  |
| 5. Mechanistic Studies.....                                 | S5  |
| 6. Characterization of new substrates and all products..... | S6  |
| 7. NMR spectra of compounds.....                            | S22 |

## 1. General information

All glassware was thoroughly oven-dried. Chemicals and solvents were either purchased from commercial suppliers or purified by standard techniques. Thin-layer chromatography plates were visualized by exposure to ultraviolet light and/or staining with phosphomolybdic acid followed by heating on a hot plate. Flash chromatography was carried out using silica gel (200–300 mesh).  $^1\text{H}$  NMR and  $^{13}\text{C}$  NMR spectra were recorded on a Bruker AM-400 (400 MHz). The spectra were recorded in deuteriochloroform ( $\text{CDCl}_3$ ) as solvent at room temperature,  $^1\text{H}$  and  $^{13}\text{C}$  NMR chemical shifts are reported in ppm relative to the residual solvent peak. The residual solvent signals were used as references and the chemical shifts were converted to the TMS scale ( $\text{CDCl}_3$ :  $\delta_{\text{H}} = 7.26$  ppm,  $\delta_{\text{C}} = 77.0$  ppm). Data for  $^1\text{H}$  NMR are reported as follows: chemical shift ( $\delta$  ppm), multiplicity (s = singlet, d = doublet, t = triplet, m = multiplet, dd = doublet, br = broad), integration, coupling constant (Hz) and assignment. Data for  $^{13}\text{C}$  NMR are reported as chemical shift. Electrospray-ionisation HRMS data were acquired on a Q-TOF mass spectrometer (Waters SYNAPT G2-Si) LC-MS TOF.

## 2. General experimental procedure

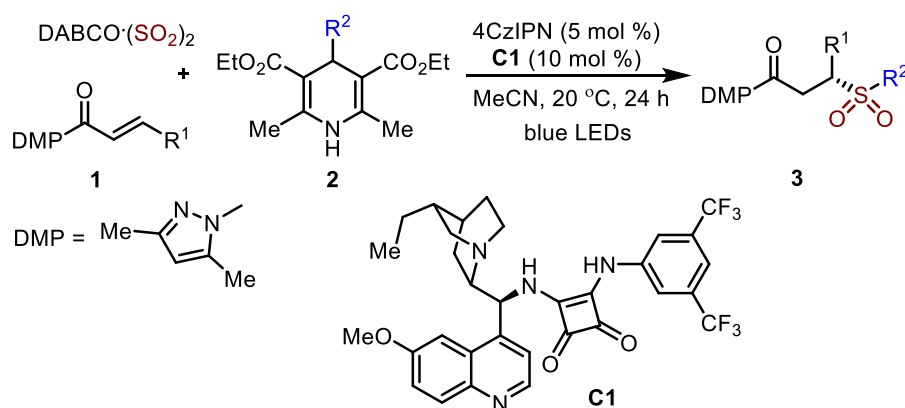

To an oven-dried flask was charged with ( $E$ )- $\alpha,\beta$ -unsaturated  $N$ -acylpyrazole **1** (0.1 mmol), DABCO $\cdot$ (SO $_2$ ) $_2$  (0.12 mmol), 4-substituted Hantzsch esters **2** (0.12 mmol), 4CzIPN (5 mol %), and **C1** (10 mol %) under nitrogen atmosphere. Then anhydrous  $\text{CH}_3\text{CN}$  (2 mL) was added to the flask. The mixture was placed around a 36

W blue LEDs and stirred under blue light irradiation for 24 hours at 20 °C. After completion of reaction as as monitored by TLC analysis, the solvent was evaporated and the residue was purified directly by flash column chromatography on silica gel (petroleum ether /ethyl acetate/dichloromethane = 6:1:1) to give the corresponding product **3**.

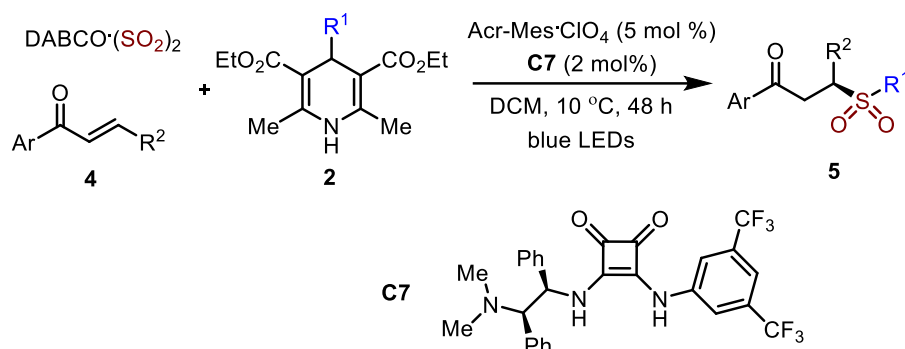

To an oven-dried flask was charged with **4** (0.1 mmol), DABCO·(SO<sub>2</sub>)<sub>2</sub> (0.12 mmol), 4-substituted Hantzsch esters **2** (0.15 mmol), Acr-Mes·ClO<sub>4</sub> (5 mol %), and **C7** (2 mol %) under nitrogen atmosphere. Then anhydrous CH<sub>3</sub>Cl<sub>2</sub> (2 mL) was added to the flask. The mixture was placed around a 36 W blue LEDs and stirred under blue light irradiation for 48 hours at 10 °C. After completion of reaction as as monitored by TLC analysis, the solvent was evaporated and the residue was purified directly by flash column chromatography on silica gel (petroleum ether /ethyl acetate / dichloromethane = 6:1:1) to give the corresponding product **5**.

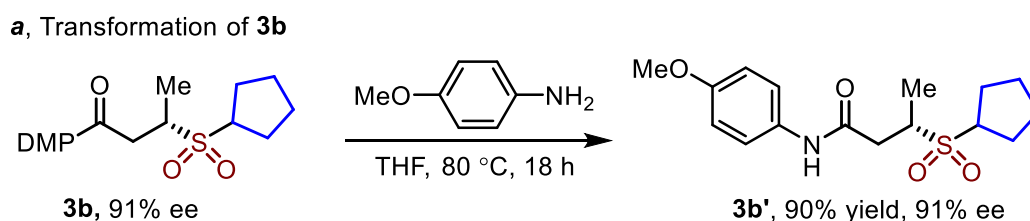

To a solution of **3b** (91% ee, 0.2 mmol) in THF (2.0 mL) was added *p*-anisidine (1.0 mmol). The reaction mixture was stirred at 80 °C for 18 h, then cooled down to room temperature and concentrated to dryness. The residue was purified by flash silica gel column chromatography (n-hexane/EtOAc (v/v): 2/1) to afford **3b'** (90% yield, 91% ee).

### 3. Substrate scopes with limitations

**Table S1** Substrate scope of Hantzsch esters

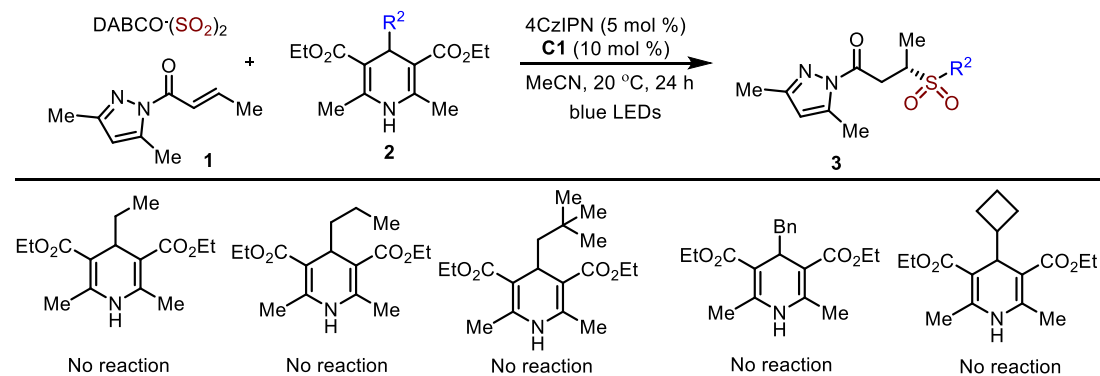

**Table S2** Substrate scope of  $\alpha,\beta$ -unsaturated carbonyl compounds

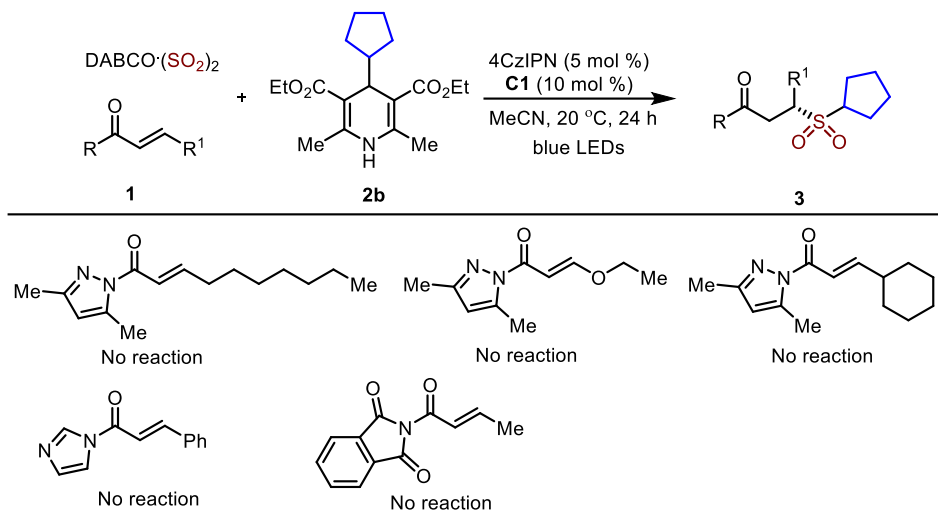

**Table S3** Substrate scope of "SO<sub>2</sub>"

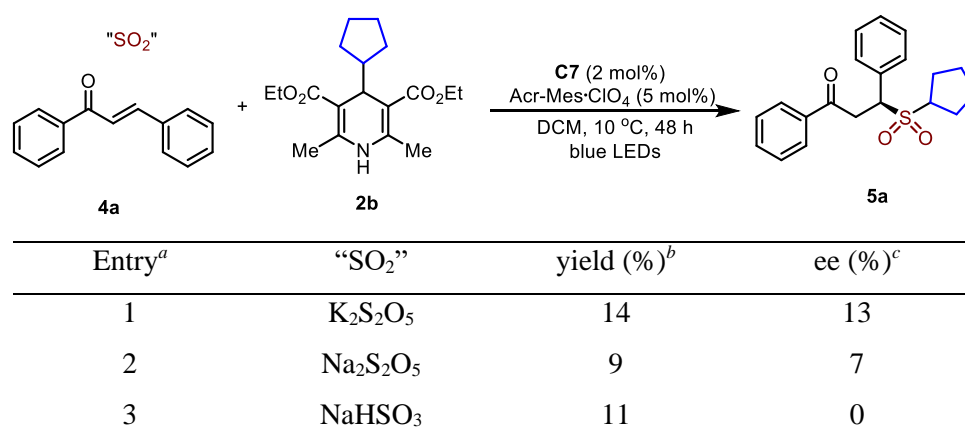

<sup>a</sup> Reaction conditions: chalcone **4a** (0.1 mmol), 4-cyclopentyl substituted Hantzsch ester **2b** (0.15 mmol), "SO<sub>2</sub>" (0.12 mmol), Acr-Mes-ClO<sub>4</sub> (5 mol %), **C7** (2 mol %), DCM (2.0 mL), blue LEDs, 10 °C, 48 h, N<sub>2</sub> atmosphere, <sup>b</sup> Isolated yields. <sup>c</sup> Determined by HPLC analysis on a chiral stationary phase.

#### 4. Devices for the photocatalytic reactions

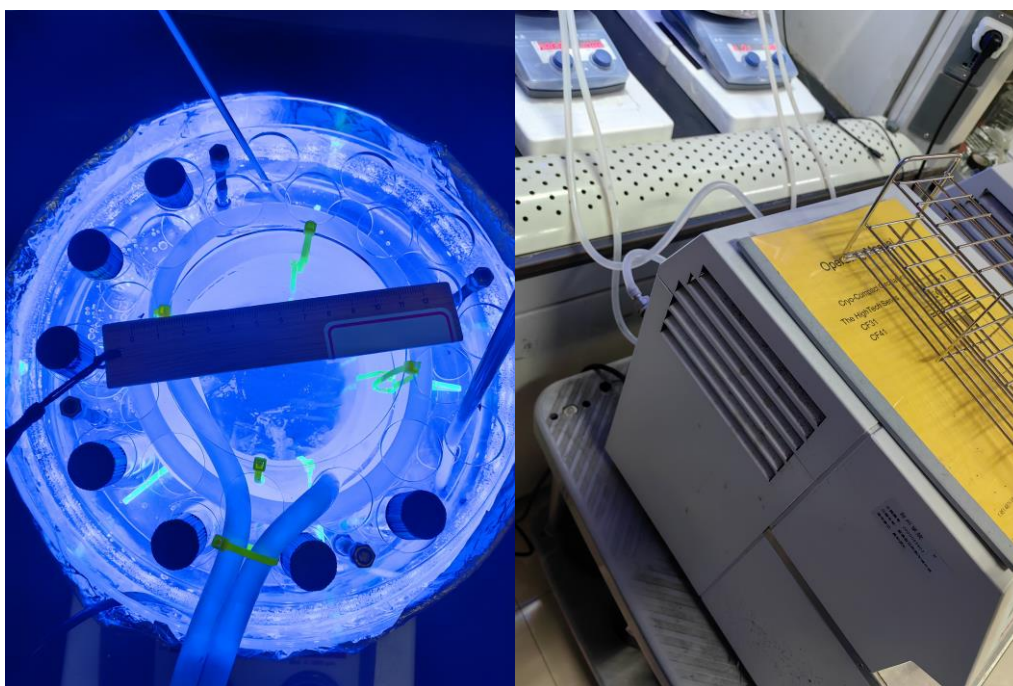

Figure S1 Devices for the photocatalytic reactions

#### 5. Mechanistic study

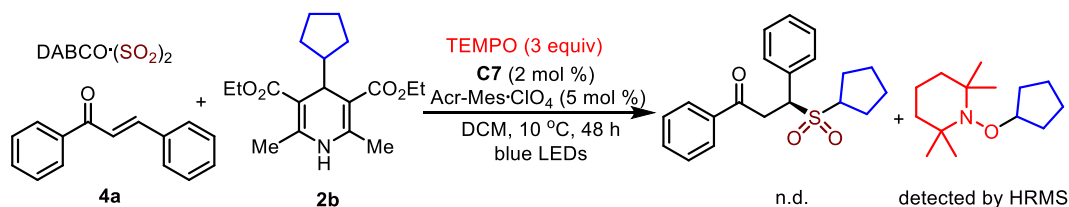

An oven-dried flask was charged with (*E*)-chalcone **4a** (0.1 mmol, 1.0 equiv.), DABCO·(SO<sub>2</sub>)<sub>2</sub> (0.12 mmol, 1.2 equiv.), 4-substituted Hantzsch esters **2b** (0.15 mmol, 1.5 equiv.), Acr-Mes·ClO<sub>4</sub> (5 mol %), **C7** (2 mol %) and TEMPO (0.3 mmol, 3.0 equiv.) under nitrogen atmosphere. Then a mixture of anhydrous CH<sub>2</sub>Cl<sub>2</sub> (2 mL) was added to the flask. The mixture was stirred under 36 W blue light irradiation for 48 hours at 10 °C. As a result, significant inhibition of the reactivity was observed, and the corresponding trapping product **3** was detected by HRMS.

HRMS (ESI) calcd for C<sub>14</sub>H<sub>28</sub>NO<sup>+</sup> (M+H<sup>+</sup>): 226.2171, found: 226.2173.

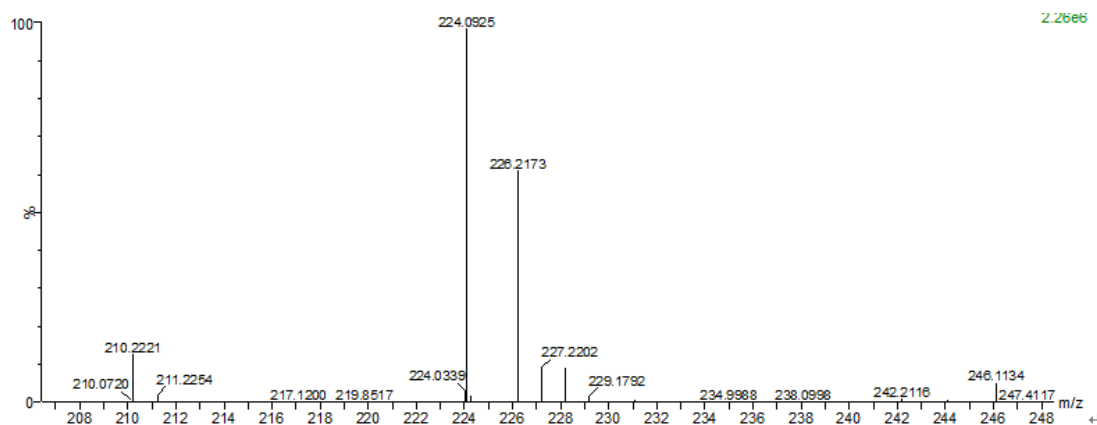

## 6. Characterization of new substrates and all products

### *(S)*-3-(cyclohexylsulfonyl)-1-(3,5-dimethyl-1H-pyrazol-1-yl)butan-1-one (**3a**)

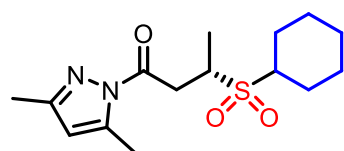

$[\alpha]_D^{20} = 30.1^\circ$  ( $c = 0.10$ ,  $\text{CHCl}_3$ );  $^1\text{H NMR}$  (400 MHz,  $\text{CDCl}_3$ )  $\delta$  5.99 (s, 1H), 3.94–3.65 (m, 2H), 3.29 (dd,  $J = 16.8, 8.8$  Hz, 1H), 3.07 (tt,  $J = 12.1, 3.3$  Hz, 1H), 2.53 (s, 3H), 2.27–2.11 (m, 5H), 1.95 (d,  $J = 12.7$  Hz, 2H), 1.74 (d,  $J = 10.6$  Hz, 1H), 1.68–1.55 (m, 2H), 1.46 (d,  $J = 6.9$  Hz, 3H), 1.30 (dd,  $J = 20.8, 10.8$  Hz, 3H);  $^{13}\text{C NMR}$  (100 MHz,  $\text{CDCl}_3$ )  $\delta$  170.3, 152.7, 144.2, 111.6, 58.2, 49.8, 35.6, 25.1, 24.9, 24.6, 14.4, 13.8, 13.6. HPLC analysis: CHIRALPAK AS-H (Hexane/*i*-PrOH) = 80:20, flow rate = 1.0 mL/min, wave length = 254 nm, 30 °C,  $t_R = 12.411$  min (major),  $t_R = 21.059$  min (minor).

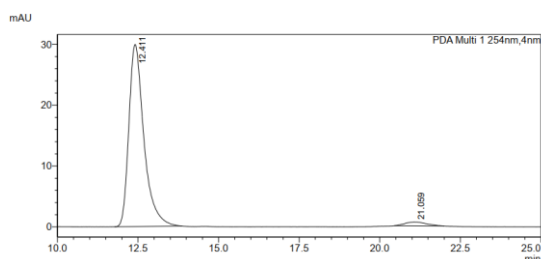

| PDA Ch1 254nm |           |        |        |        |
|---------------|-----------|--------|--------|--------|
| Peak#         | Ret. Time | Area   | Height | Aera%  |
| 1             | 12.411    | 969789 | 29907  | 97.066 |
| 2             | 21.059    | 29309  | 631    | 2.934  |

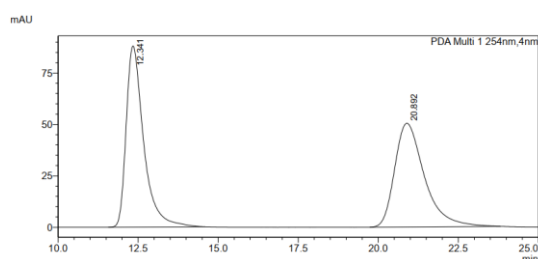

| PDA Ch1 254nm |           |         |        |        |
|---------------|-----------|---------|--------|--------|
| Peak#         | Ret. Time | Area    | Height | Aera%  |
| 1             | 12.341    | 3346020 | 88065  | 50.699 |
| 2             | 20.892    | 3253792 | 50368  | 49.301 |

### *(S)*-3-(cyclopentylsulfonyl)-1-(3,5-dimethyl-1H-pyrazol-1-yl)butan-1-one (**3b**)

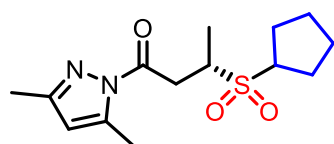

$[\alpha]_D^{20} = -7.9^\circ$  ( $c = 0.10$ ,  $\text{CHCl}_3$ );  $^1\text{H NMR}$  (400 MHz,  $\text{CDCl}_3$ )  $\delta$  5.98 (s, 1H), 3.93 – 3.69 (m, 2H), 3.63 – 3.47

(m, 1H), 3.32 (dd,  $J = 17.2, 8.8$  Hz, 1H), 2.54 (s, 3H), 2.23 (s, 3H), 2.18 – 1.99 (m, 4H), 1.89 – 1.78 (m, 2H), 1.75 – 1.62 (m, 2H), 1.48 (d,  $J = 6.9$  Hz, 3H);  $^{13}\text{C}$  NMR (100 MHz,  $\text{CDCl}_3$ )  $\delta$  170.4, 152.7, 144.2, 111.6, 58.5, 52.1, 35.6, 27.0, 26.7, 26.1, 26.0, 14.4, 14.0, 13.8. HPLC analysis: CHIRALPAK AD-H (Hexane/*i*-PrOH) = 80:20, flow rate = 1.0 mL/min, wave length = 254 nm, 30 °C,  $t_R = 8.889$  min (major),  $t_R = 10.148$  min (minor).

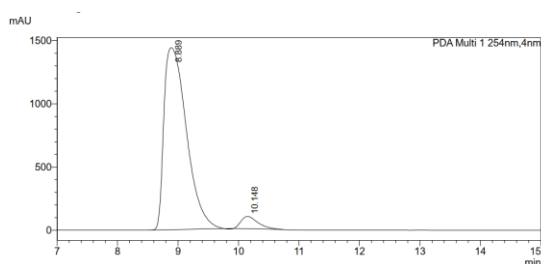

| PDA Ch1 254nm |           |          |         |        |
|---------------|-----------|----------|---------|--------|
| Peak#         | Ret. Time | Area     | Height  | Aera%  |
| 1             | 8.889     | 37247489 | 1439837 | 95.114 |
| 2             | 10.148    | 1913502  | 97656   | 4.886  |

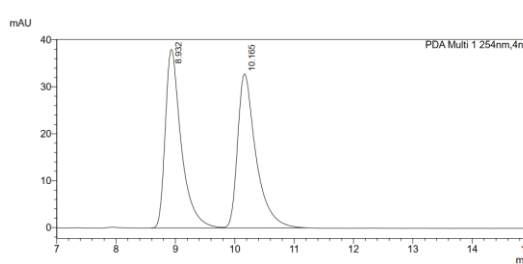

| PDA Ch1 254nm |           |        |        |        |
|---------------|-----------|--------|--------|--------|
| Peak#         | Ret. Time | Area   | Height | Aera%  |
| 1             | 8.932     | 708962 | 38062  | 50.141 |
| 2             | 10.165    | 704968 | 32856  | 49.859 |

***(S)*-1-(3,5-dimethyl-1H-pyrazol-1-yl)-3-((tetrahydro-2H-pyran-4-yl)sulfonyl)butan-1-one (3c)**

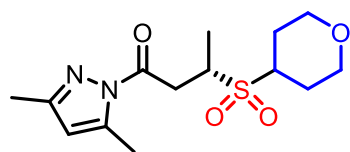

$[\alpha]_D^{20} = -6.6^\circ$  ( $c = 0.10$ ,  $\text{CHCl}_3$ );  $^1\text{H}$  NMR (400 MHz,  $\text{CDCl}_3$ )  $\delta$  6.00 (s, 1H), 4.14 (d,  $J = 11.1$  Hz, 2H), 3.84 (dd,  $J = 17.1, 3.2$  Hz, 2H), 3.51 – 3.38 (m, 2H), 3.37 – 3.19 (m, 2H), 2.53 (s, 3H), 2.22 (s, 3H), 2.11 – 1.93 (m, 4H), 1.48 (d,  $J = 6.8$  Hz, 3H);  $^{13}\text{C}$  NMR (100 MHz,  $\text{CDCl}_3$ )  $\delta$  170.2, 152.8, 144.2, 111.7, 66.5, 55.5, 50.0, 35.8, 24.9, 14.4, 13.8, 13.6; HRMS (ESI)  $m/z$  Calcd for  $\text{C}_{14}\text{H}_{22}\text{N}_2\text{O}_4\text{NaS}$   $[\text{M}+\text{Na}]^+$ : 337.1198, Found: 337.1190; HPLC analysis: CHIRALPAK AS-H (Hexane/*i*-PrOH) = 80:20, flow rate = 1.0 mL/min, wave length = 254 nm, 30 °C,  $t_R = 19.553$  min (major),  $t_R = 32.075$  min (minor).

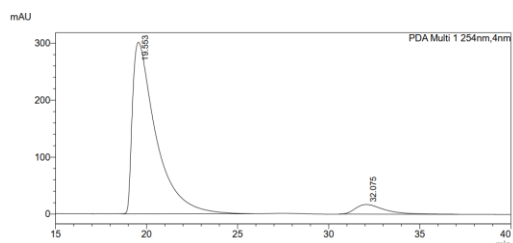

| PDA Ch1 254nm |           |          |        |        |
|---------------|-----------|----------|--------|--------|
| Peak#         | Ret. Time | Area     | Height | Aera%  |
| 1             | 19.553    | 27041663 | 301448 | 93.565 |
| 2             | 32.075    | 1859742  | 16949  | 6.435  |

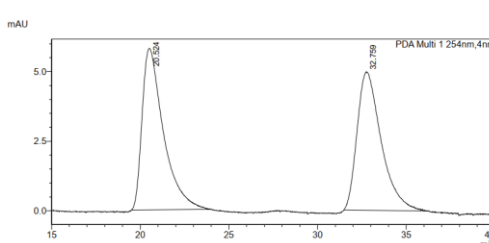

| PDA Ch1 254nm |           |        |        |        |
|---------------|-----------|--------|--------|--------|
| Peak#         | Ret. Time | Area   | Height | Aera%  |
| 1             | 20.524    | 484736 | 5801   | 50.753 |
| 2             | 32.759    | 470348 | 4977   | 49.247 |

**(S)-1-(3,5-dimethyl-1H-pyrazol-1-yl)-3-(isopropylsulfonyl)butan-1-one (3d)**

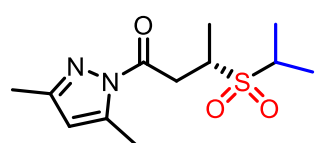

$[\alpha]_D^{20} = -3.8^\circ$  ( $c = 0.10$ ,  $\text{CHCl}_3$ );  $^1\text{H NMR}$  (400 MHz,  $\text{CDCl}_3$ )  $\delta$  5.99 (s, 1H), 3.96 – 3.71 (m, 2H), 3.44 – 3.23 (m, 2H), 2.54 (s, 3H), 2.23 (s, 3H), 1.56 – 1.32 (m, 9H);  $^{13}\text{C NMR}$  (100 MHz,  $\text{CDCl}_3$ )  $\delta$  170.3, 152.7, 144.2, 111.6, 50.1, 49.9, 35.7, 15.3, 15.0, 14.4, 13.8, 13.8. HPLC analysis: CHIRALPAK AS-H (Hexane/*i*-PrOH) = 80:20, flow rate = 1.0 mL/min, wave length = 254 nm, 30 °C,  $t_R = 8.531$  min (major),  $t_R = 10.996$  min (minor).

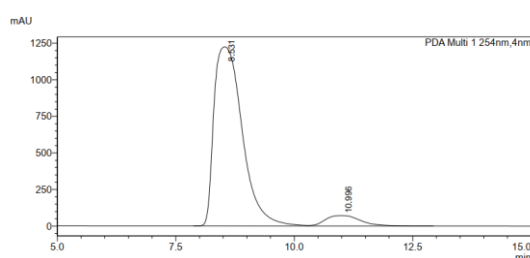

| PDA Ch1 254nm |           |          |         |        |
|---------------|-----------|----------|---------|--------|
| Peak#         | Ret. Time | Area     | Height  | Aera%  |
| 1             | 8.531     | 50872425 | 1223173 | 93.322 |
| 2             | 10.996    | 3640551  | 71287   | 6.678  |

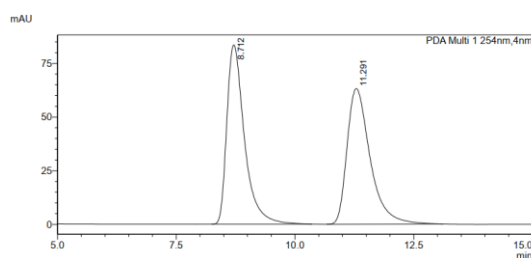

| PDA Ch1 254nm |           |         |        |        |
|---------------|-----------|---------|--------|--------|
| Peak#         | Ret. Time | Area    | Height | Aera%  |
| 1             | 8.712     | 2154287 | 83464  | 50.236 |
| 2             | 11.291    | 2134035 | 63124  | 49.764 |

**(S)-1-(3,5-dimethyl-1H-pyrazol-1-yl)-3-(pentan-3-ylsulfonyl)butan-1-one (3e)**

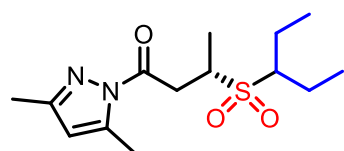

$[\alpha]_D^{20} = +5.6^\circ$  ( $c = 0.10$ ,  $\text{CHCl}_3$ );  $^1\text{H NMR}$  (400 MHz,  $\text{CDCl}_3$ )  $\delta$  5.99 (s, 1H), 3.93–3.75 (m, 2H), 3.28 (dd,  $J = 17.0, 8.7$  Hz, 1H), 3.01–2.81 (m, 1H), 2.54 (s, 3H), 2.23 (s, 3H), 2.07–1.94 (m, 2H), 1.88–1.83 (m, 2H), 1.46 (d,  $J = 6.8$  Hz, 3H), 1.10 (t,  $J = 7.5$  Hz, 6H);  $^{13}\text{C NMR}$  (100 MHz,  $\text{CDCl}_3$ )  $\delta$  170.4, 152.7, 144.2, 111.6, 61.4, 51.0, 35.7, 19.9, 19.6, 14.4, 13.9, 13.8, 11.1, 11.0; HRMS (ESI)  $m/z$  Calcd for  $\text{C}_{14}\text{H}_{24}\text{N}_2\text{O}_3\text{NaS}$   $[\text{M}+\text{Na}]^+$ : 323.1405, Found: 323.1400; HPLC analysis: CHIRALPAK AS-H (Hexane/*i*-PrOH) = 80:20, flow rate = 1.0 mL/min, wave length = 240 nm, 30 °C,  $t_R = 13.040$  min (major),  $t_R = 16.959$  min (minor).



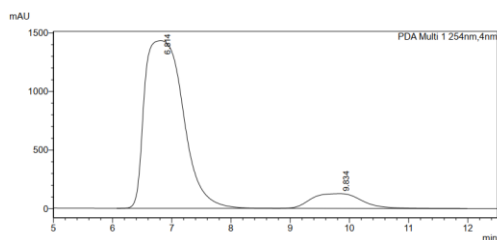

PDA Ch1 254nm

| Peak# | Ret. Time | Area     | Height  | Aera%  |
|-------|-----------|----------|---------|--------|
| 1     | 6.814     | 64935084 | 1430495 | 89.793 |
| 2     | 9.834     | 7381049  | 126090  | 10.207 |

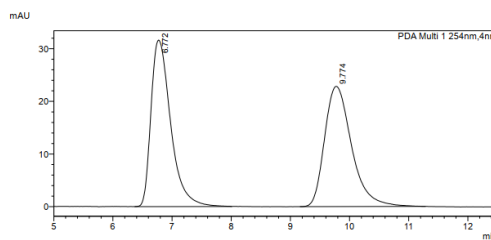

PDA Ch1 254nm

| Peak# | Ret. Time | Area   | Height | Aera%  |
|-------|-----------|--------|--------|--------|
| 1     | 6.772     | 730802 | 31652  | 50.144 |
| 2     | 9.774     | 726595 | 22863  | 49.856 |

***(R)*-3-(cyclopentylsulfonyl)-1-(3,5-dimethyl-1H-pyrazol-1-yl)-3-(tetrahydro-2H-pyran-4-yl)propan-1-one (3f)**

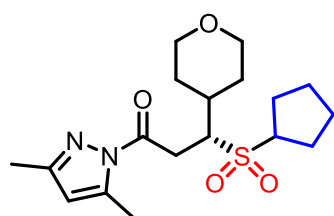

$[\alpha]_D^{20} = +9.9^\circ$  (c = 0.10, CHCl<sub>3</sub>); <sup>1</sup>H NMR (400 MHz, CDCl<sub>3</sub>) δ 6.00 (s, 1H), 3.99 (dd, *J* = 11.0, 3.3 Hz, 2H), 3.88 (dd, *J* = 18.9, 6.9 Hz, 1H), 3.77 (dt, *J* = 7.0, 3.7 Hz, 1H), 3.57 – 3.39 (m, 4H), 2.65–2.56 (m, 1H), 2.53 (s, 3H),

2.24 (s, 3H), 2.16 (dd, *J* = 13.5, 7.1 Hz, 1H), 2.12 – 2.02 (m, 2H), 1.95 (d, *J* = 13.6 Hz, 2H), 1.88–1.76 (m, 2H), 1.72–1.60 (m, 3H), 1.55 (dd, *J* = 9.4, 3.8 Hz, 2H); <sup>13</sup>C NMR (100 MHz, CDCl<sub>3</sub>) δ 171.0, 152.8, 144.2, 111.7, 67.9, 67.6, 60.9, 59.5, 34.6, 31.2, 30.9, 28.3, 27.5, 26.2, 26.1, 26.1, 14.5, 13.8. HPLC analysis: CHIRALPAK AS-H (Hexane/*i*-PrOH) = 80:20, flow rate = 1.0 mL/min, wave length = 254 nm, 30 °C, *t*<sub>R</sub> = 8.637 min (major), *t*<sub>R</sub> = 11.014 min (minor).

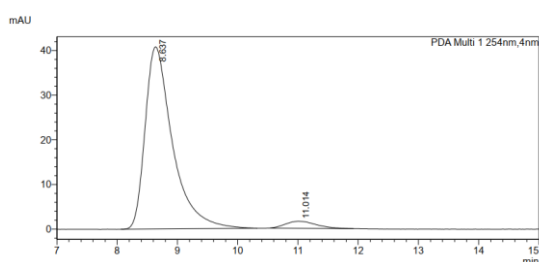

PDA Ch1 254nm

| Peak# | Ret. Time | Area    | Height | Aera%  |
|-------|-----------|---------|--------|--------|
| 1     | 8.637     | 1290502 | 40772  | 95.782 |
| 2     | 11.014    | 56835   | 1599   | 4.218  |

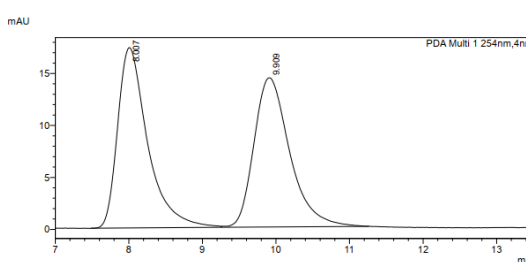

PDA Ch1 254nm

| Peak# | Ret. Time | Area   | Height | Aera%  |
|-------|-----------|--------|--------|--------|
| 1     | 8.007     | 492445 | 17349  | 50.335 |
| 2     | 9.909     | 485894 | 14356  | 49.665 |

***(R)*-3-cyclopentyl-3-(cyclopentylsulfonyl)-1-(3,5-dimethyl-1H-pyrazol-1-yl)propan-1-one (3g)**

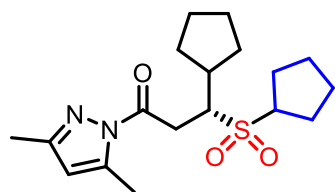

$[\alpha]_D^{20} = +4.8^\circ$  ( $c = 0.10$ ,  $\text{CHCl}_3$ );  $^1\text{H NMR}$  (400 MHz,  $\text{CDCl}_3$ )  $\delta$  5.98 (s, 1H), 4.09–3.77 (m, 2H), 3.62–3.40 (m, 1H), 3.28 (dd,  $J = 21.2, 6.4$  Hz, 1H), 2.66–2.41 (m, 4H), 2.23 (s, 3H), 2.13 (dd,  $J = 13.7, 6.9$  Hz, 2H), 2.06–1.89 (m, 4H), 1.87–1.74 (m, 2H), 1.70–1.58 (m, 6H), 1.40 (dd,  $J = 14.7, 7.4$  Hz, 2H);  $^{13}\text{C NMR}$  (100 MHz,  $\text{CDCl}_3$ )  $\delta$  171.2, 152.6, 144.2, 111.6, 60.5, 59.4, 38.9, 32.1, 31.5, 28.9, 27.0, 26.8, 26.1, 25.0, 24.9, 14.5, 13.8; HPLC analysis: CHIRALPAK AS-H (Hexane/*i*-PrOH) = 80:20, flow rate = 1.0 mL/min, wave length = 254 nm, 30 °C,  $t_R = 9.524$  min (minor),  $t_R = 11.098$  min (major).

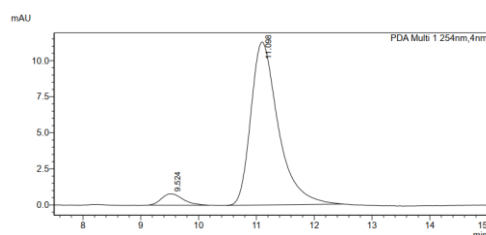

PDA Ch1 254nm

| Peak# | Ret. Time | Area   | Height | Aera%  |
|-------|-----------|--------|--------|--------|
| 1     | 9.524     | 20454  | 797    | 5.191  |
| 2     | 11.098    | 373600 | 11292  | 94.809 |

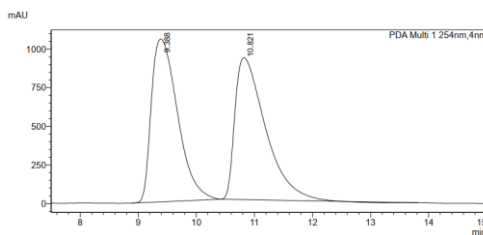

PDA Ch1 254nm

| Peak# | Ret. Time | Area     | Height  | Aera%  |
|-------|-----------|----------|---------|--------|
| 1     | 9.388     | 33188887 | 1054372 | 49.611 |
| 2     | 10.821    | 33709432 | 919312  | 50.389 |

### *(S)*-3-(cyclopentylsulfonyl)-1-(3,5-diphenyl-1H-pyrazol-1-yl)butan-1-one (3h)

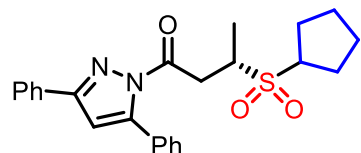

$[\alpha]_D^{20} = +5.0^\circ$  ( $c = 0.10$ ,  $\text{CHCl}_3$ );  $^1\text{H NMR}$  (400 MHz,  $\text{CDCl}_3$ )  $\delta$  7.90 (d,  $J = 7.0$  Hz, 2H), 7.44 (dd,  $J = 10.0, 7.0$  Hz, 8H), 6.75 (s, 1H), 4.04 (dd,  $J = 17.7, 3.8$  Hz, 1H), 3.76 (ddd,  $J = 10.6, 6.8, 3.9$  Hz, 1H), 3.66–3.40 (m, 2H), 2.24–1.92 (m, 4H), 1.83 (d,  $J = 2.1$  Hz, 2H), 1.67 (dd,  $J = 12.3, 5.9$  Hz, 2H), 1.49 (d,  $J = 6.8$  Hz, 3H);  $^{13}\text{C NMR}$  (100 MHz,  $\text{CDCl}_3$ )  $\delta$  169.8, 154.1, 147.6, 131.3, 130.7, 129.5, 129.1, 129.0, 128.9, 128.0, 126.4, 110.3, 58.5, 52.1, 35.6, 27.2, 26.4, 26.1, 26.0, 14.3; HRMS (ESI) calcd for  $\text{C}_{24}\text{H}_{26}\text{N}_2\text{O}_3\text{NaS}$   $[\text{M}+\text{Na}]^+$ : 445.1562, found: 445.1555. HPLC analysis: CHIRALPAK AS-H (Hexane/*i*-PrOH) = 80:20, flow rate = 1.0 mL/min, wave length = 254 nm, 30 °C,  $t_R = 13.818$  min (minor),  $t_R = 19.383$  min (major).

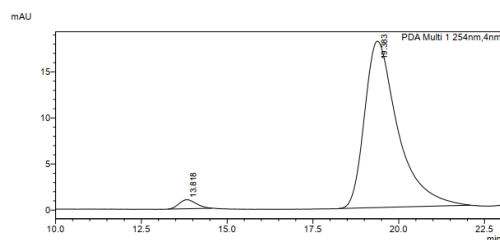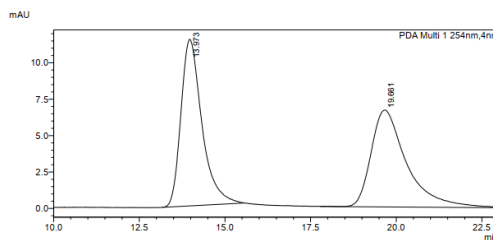

| PDA Ch1 254nm |           |         |        |        |
|---------------|-----------|---------|--------|--------|
| Peak#         | Ret. Time | Area    | Height | Aera%  |
| 1             | 13.818    | 34239   | 979    | 2.737  |
| 2             | 19.383    | 1216569 | 18062  | 97.263 |

| PDA Ch1 254nm |           |        |        |        |
|---------------|-----------|--------|--------|--------|
| Peak#         | Ret. Time | Area   | Height | Aera%  |
| 1             | 13.973    | 486596 | 11432  | 50.323 |
| 2             | 19.661    | 480346 | 6647   | 49.677 |

***(S)*-3-(cyclopentylsulfonyl)-1-(1H-pyrazol-1-yl)butan-1-one (3i)**

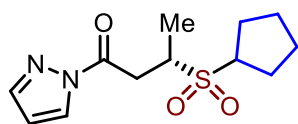

$[\alpha]_D^{20} = -4.5^\circ$  ( $c = 0.35$ ,  $\text{CHCl}_3$ );  $^1\text{H NMR}$  (400 MHz,  $\text{CDCl}_3$ )  $\delta$  8.25 (d,  $J = 2.8$  Hz, 1H), 7.74 (d,  $J = 0.8$  Hz, 1H), 6.48 (dd,  $J = 2.8, 0.8$  Hz, 1H), 3.91 (dd,  $J = 17.4, 4.5$  Hz,

1H), 3.85–3.75 (m, 1H), 3.62–3.51 (m, 1H), 3.35 (dd,  $J = 17.4, 8.7$  Hz, 1H), 2.20–1.98 (m, 4H), 1.90–1.78 (m, 2H), 1.73–1.62 (m, 2H), 1.50 (d,  $J = 6.9$  Hz, 3H);  $^{13}\text{C NMR}$  (100 MHz,  $\text{CDCl}_3$ )  $\delta$  169.0, 144.5, 128.4, 110.2, 58.6, 52.0, 34.3, 27.1, 26.5, 26.0, 26.0, 14.1; HRMS (ESI) calcd for  $\text{C}_{12}\text{H}_{18}\text{N}_2\text{O}_3\text{NaS}$   $[\text{M}+\text{Na}]^+$ : 293.0936, found: 293.0938. HPLC analysis: CHIRALPAK AS-H (Hexane/*i*-PrOH) = 70:30, flow rate = 1.0 mL/min, wave length = 254 nm, 30 °C,  $t_R = 15.588$  min (minor),  $t_R = 30.086$  min (major).

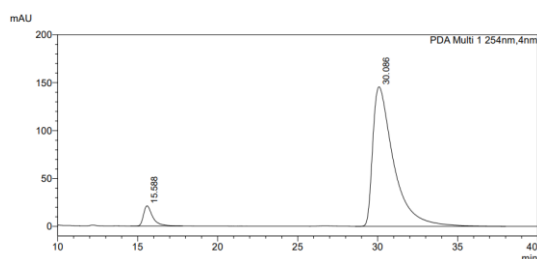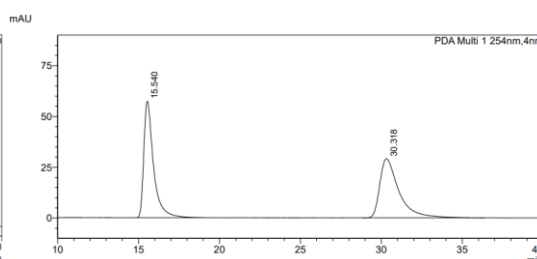

| PDA Ch1 254nm |           |          |        |        |
|---------------|-----------|----------|--------|--------|
| Peak#         | Ret. Time | Area     | Height | Aera%  |
| 1             | 15.588    | 840598   | 21125  | 5.977  |
| 2             | 30.086    | 13223378 | 145567 | 94.023 |

| PDA Ch1 254nm |           |         |        |        |
|---------------|-----------|---------|--------|--------|
| Peak#         | Ret. Time | Area    | Height | Aera%  |
| 1             | 15.540    | 2396632 | 57232  | 50.119 |
| 2             | 30.318    | 2385230 | 29023  | 49.881 |

***(S)*-3-(cyclopentylsulfonyl)-1-(furan-2-yl)butan-1-one (3j)**

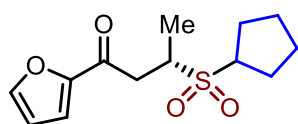

$[\alpha]_D^{20} = -21.1^\circ$  ( $c = 0.2$ ,  $\text{CHCl}_3$ );  $^1\text{H NMR}$  (400 MHz,  $\text{CDCl}_3$ )  $\delta$  7.63 (d,  $J = 1.0$  Hz, 1H), 7.28 (d,  $J = 3.4$  Hz, 1H), 6.58 (dd,  $J = 3.6, 1.0$  Hz, 1H), 3.85–3.75 (m, 1H), 3.62–3.47

(m, 2H), 3.07 (dd,  $J = 17.6, 9.0$  Hz, 1H), 2.24–2.12 (m, 1H), 2.21–1.96 (m, 3H), 1.91–1.77 (m, 2H), 1.71–1.59 (m, 2H), 1.44 (d,  $J = 6.8$  Hz, 3H);  $^{13}\text{C NMR}$  (100 MHz,  $\text{CDCl}_3$ )  $\delta$  184.9, 152.0, 147.0, 118.1, 112.5, 58.4, 51.2, 37.2, 27.3, 26.2, 26.0, 25.9, 14.3; HRMS (ESI) calcd for  $\text{C}_{13}\text{H}_{18}\text{O}_4\text{NaS}$   $[\text{M}+\text{Na}]^+$ : 293.0823, found: 293.0825.

HPLC analysis: CHIRALPAK IA (Hexane/*i*-PrOH) = 80:20, flow rate = 1.0 mL/min, wave length = 254 nm, 30 °C,  $t_R$  = 10.896 min (major),  $t_R$  = 13.624 min (minor).

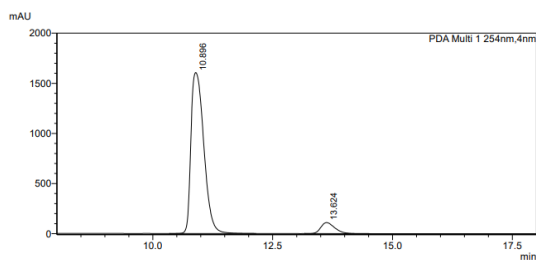

| PDA Ch1 254nm |           |          |         |        |
|---------------|-----------|----------|---------|--------|
| Peak#         | Ret. Time | Area     | Height  | Aera%  |
| 1             | 10.896    | 30037868 | 1604958 | 93.056 |
| 2             | 13.624    | 2241544  | 110050  | 6.944  |

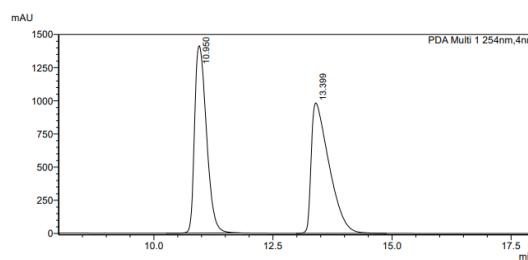

| PDA Ch1 254nm |           |          |         |        |
|---------------|-----------|----------|---------|--------|
| Peak#         | Ret. Time | Area     | Height  | Aera%  |
| 1             | 10.950    | 24474997 | 1411339 | 48.877 |
| 2             | 13.399    | 25599707 | 982935  | 51.123 |

**(S)-3-(cyclopentylsulfonyl)-1,3-diphenylpropan-1-one (5a)**

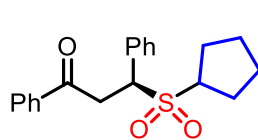

$[\alpha]_D^{20} = -47.9^\circ$  (c = 0.10, CHCl<sub>3</sub>); <sup>1</sup>H NMR (400 MHz, CDCl<sub>3</sub>)

δ 7.99–7.89 (m, 2H), 7.60–7.51 (m, 3H), 7.44 (t, *J* = 7.7 Hz, 2H), 7.41–7.31 (m, 3H), 4.96 (dd, *J* = 9.6, 3.3 Hz, 1H), 4.08

(dd, *J* = 18.0, 3.3 Hz, 1H), 3.83 (dd, *J* = 18.0, 9.7 Hz, 1H), 3.15–2.96 (m, 1H), 2.19–

1.90 (m, 3H), 1.85–1.65 (m, 3H), 1.63 – 1.42 (m, 2H); <sup>13</sup>C NMR (100 MHz, CDCl<sub>3</sub>)

δ 195.2, 136.2, 133.7, 133.6, 129.6, 129.1, 129.0, 128.7, 128.2, 77.4, 77.1, 76.8, 62.1,

58.5, 37.1, 28.0, 26.1, 26.1, 25.6; HPLC analysis: CHIRALPAK AS-H (Hexane/*i*-

PrOH) = 80:20, flow rate = 1.0 mL/min, wave length = 254 nm, 30 °C,  $t_R$  = 13.085

min (major),  $t_R$  = 17.048 min (minor).

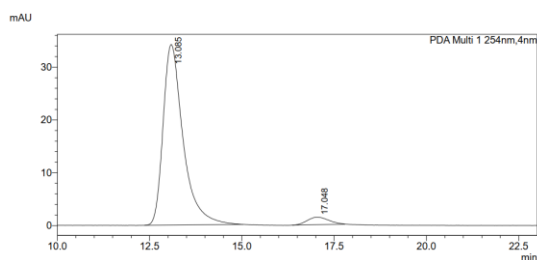

| PDA Ch1 254nm |           |         |        |        |
|---------------|-----------|---------|--------|--------|
| Peak#         | Ret. Time | Area    | Height | Aera%  |
| 1             | 13.085    | 1290436 | 34154  | 95.766 |
| 2             | 17.048    | 57052   | 1422   | 4.234  |

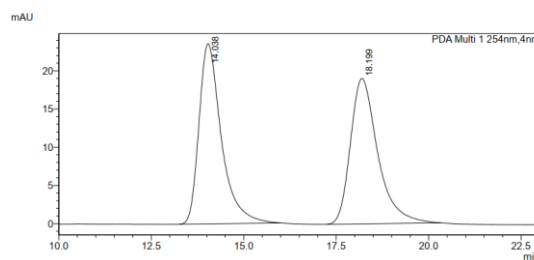

| PDA Ch1 254nm |           |        |        |        |
|---------------|-----------|--------|--------|--------|
| Peak#         | Ret. Time | Area   | Height | Aera%  |
| 1             | 14.038    | 992575 | 23590  | 50.344 |
| 2             | 18.199    | 978993 | 19044  | 49.656 |

**(S)-3-(cyclohexylsulfonyl)-1,3-diphenylpropan-1-one (5b)**

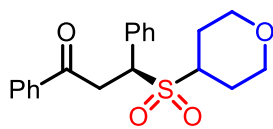

$[\alpha]_D^{20} = -3.3^\circ$  ( $c = 0.10$ ,  $\text{CHCl}_3$ );  $^1\text{H NMR}$  (400 MHz,  $\text{CDCl}_3$ )  $\delta$  7.94 (d,  $J = 7.4$  Hz, 2H), 7.59–7.53 (m, 3H), 7.46 (t,  $J = 7.7$  Hz, 2H), 7.38 (d,  $J = 7.5$  Hz, 3H), 5.02 (dd,  $J = 9.5, 3.2$  Hz, 1H), 4.13–3.97 (m, 3H), 3.83 (dd,  $J = 18.0, 9.5$  Hz, 1H), 3.22 (dt,  $J = 7.3, 5.7$  Hz, 2H), 2.90–2.85 (m, 1H), 2.02–1.85 (m, 3H), 1.76 (dd,  $J = 13.1, 1.9$  Hz, 1H).;  $^{13}\text{C NMR}$  (100 MHz,  $\text{CDCl}_3$ )  $\delta$  195.0, 136.0, 133.8, 133.2, 129.5, 129.3, 129.2, 128.8, 128.2, 66.6, 66.0, 60.6, 55.4, 37.3, 26.3, 23.5; HPLC analysis: CHIRALPAK IA (Hexane/*i*-PrOH) = 80:20, flow rate = 1.0 mL/min, wave length = 254 nm, 30 °C,  $t_R = 21.871$  min (major),  $t_R = 26.115$  min (minor).

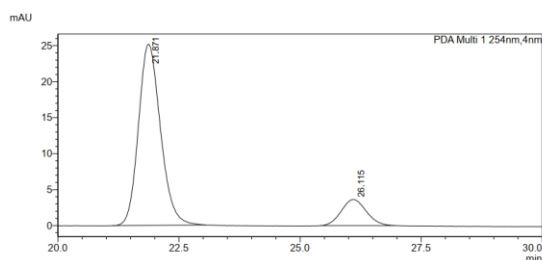

| PDA Ch1 254nm |           |        |        |        |
|---------------|-----------|--------|--------|--------|
| Peak#         | Ret. Time | Area   | Height | Aera%  |
| 1             | 21.871    | 797664 | 25182  | 85.886 |
| 2             | 26.115    | 131081 | 3634   | 14.114 |

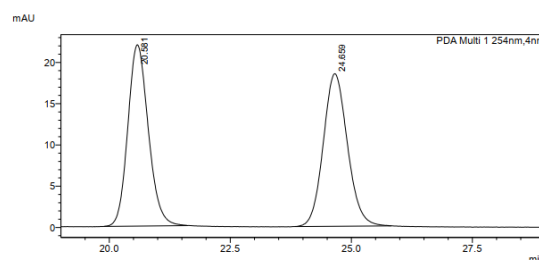

| PDA Ch1 254nm |           |        |        |        |
|---------------|-----------|--------|--------|--------|
| Peak#         | Ret. Time | Area   | Height | Aera%  |
| 1             | 20.581    | 646956 | 21957  | 50.183 |
| 2             | 24.659    | 642239 | 18489  | 49.817 |

### *(S)*-3-(isopropylsulfonyl)-1,3-diphenylpropan-1-one (5c)

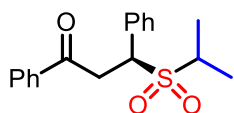

$[\alpha]_D^{20} = -28.1^\circ$  ( $c = 0.10$ ,  $\text{CHCl}_3$ );  $^1\text{H NMR}$  (400 MHz,  $\text{CDCl}_3$ )  $\delta$  7.94 (d,  $J = 7.5$  Hz, 2H), 7.57 (t,  $J = 8.0$  Hz, 3H), 7.45 (t,  $J = 7.7$  Hz, 2H), 7.41–7.31 (m, 3H), 5.07 (dd,  $J = 9.7, 3.1$  Hz, 1H), 4.07 (dd,  $J = 17.9, 3.1$  Hz, 1H), 3.84 (dd,  $J = 17.9, 9.7$  Hz, 1H), 2.87 (dt,  $J = 13.7, 6.8$  Hz, 1H), 1.37 (d,  $J = 6.7$  Hz, 3H), 1.27 (d,  $J = 7.0$  Hz, 3H).;  $^{13}\text{C NMR}$  (100 MHz,  $\text{CDCl}_3$ )  $\delta$  195.2, 136.1, 133.7, 133.5, 129.5, 129.1, 129.0, 128.7, 128.2, 60.3, 50.1, 37.4, 16.6, 13.7; HPLC analysis: CHIRALPAK IA (Hexane/*i*-PrOH) = 80:20, flow rate = 1.0 mL/min, wave length = 254 nm, 30 °C,  $t_R = 12.216$  min (minor),  $t_R = 12.961$  min (major).

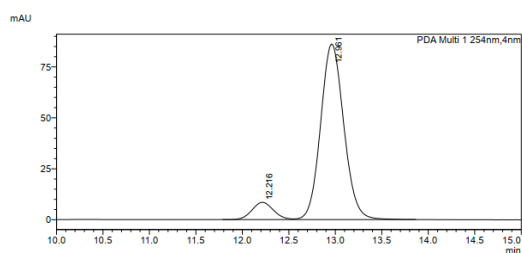

PDA Ch1 254nm

| Peak# | Ret. Time | Area    | Height | Aera%  |
|-------|-----------|---------|--------|--------|
| 1     | 12.216    | 136755  | 8469   | 8.374  |
| 2     | 12.961    | 1496369 | 86182  | 91.626 |

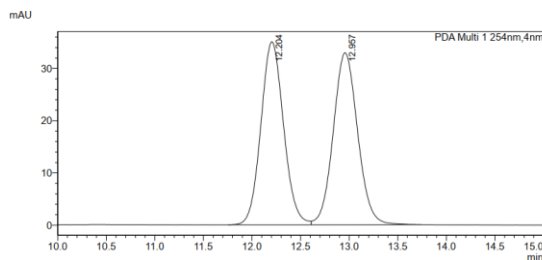

PDA Ch1 254nm

| Peak# | Ret. Time | Area   | Height | Aera%  |
|-------|-----------|--------|--------|--------|
| 1     | 12.204    | 569400 | 35041  | 49.756 |
| 2     | 12.957    | 574989 | 32922  | 50.244 |

### (R)-3-(cyclopentylsulfonyl)-1-phenylbutan-1-one (5d)

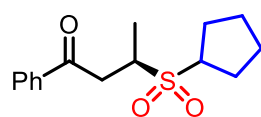

$[\alpha]_D^{20} = +11.9^\circ$  (c = 0.10, CHCl<sub>3</sub>); <sup>1</sup>H NMR (400 MHz, CDCl<sub>3</sub>)

δ 8.02 – 7.96 (m, 2H), 7.61 (t, *J* = 7.4 Hz, 1H), 7.49 (t, *J* = 7.7 Hz, 2H), 3.89–3.82 (m, 1H), 3.76 (dd, *J* = 17.9, 3.4 Hz, 1H),

3.59–3.48 (m, 1H), 3.20 (dd, *J* = 17.9, 9.1 Hz, 1H), 2.20 (dd, *J* = 13.4, 7.8 Hz, 1H), 2.10–1.97 (m, 3H), 1.88–1.78 (m, 2H), 1.73–1.62 (m, 2H), 1.46 (d, *J* = 6.8 Hz, 3H);

<sup>13</sup>C NMR (100 MHz, CDCl<sub>3</sub>) δ 196.1, 136.2, 133.8, 128.8, 128.2, 58.4, 51.7, 37.4, 27.4, 26.2, 26.1, 26.0, 14.6; HRMS (ESI) calcd for C<sub>15</sub>H<sub>20</sub>O<sub>3</sub>NaS [M+Na]<sup>+</sup>: 303.1031, found: 303.1032; HPLC analysis: CHIRALPAK IA (Hexane/*i*-PrOH) = 80:20, flow rate = 1.0 mL/min, wave length = 254 nm, 30 °C, *t*<sub>R</sub> = 7.887 min (minor), *t*<sub>R</sub> = 9.380 min (major).

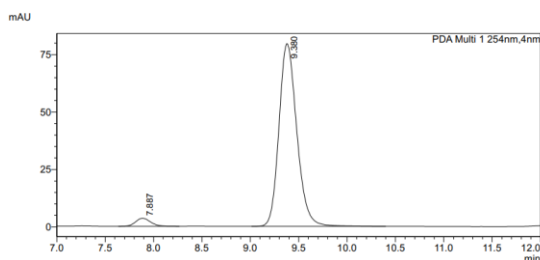

PDA Ch1 254nm

| Peak# | Ret. Time | Area    | Height | Aera%  |
|-------|-----------|---------|--------|--------|
| 1     | 7.887     | 37983   | 3517   | 3.583  |
| 2     | 9.380     | 1022090 | 79585  | 96.417 |

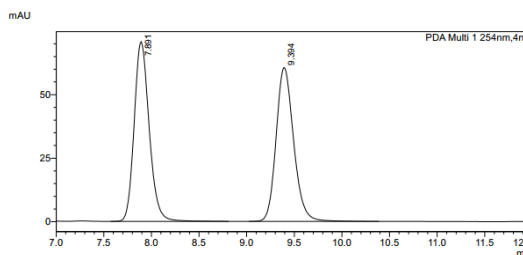

PDA Ch1 254nm

| Peak# | Ret. Time | Area   | Height | Aera%  |
|-------|-----------|--------|--------|--------|
| 1     | 7.891     | 776223 | 70695  | 50.008 |
| 2     | 9.394     | 775970 | 60498  | 49.992 |

### (S)-3-(cyclopentylsulfonyl)-3-cyclopropyl-1-phenylpropan-1-one (5e)

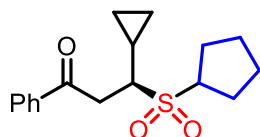

$[\alpha]_D^{20} = +9.8^\circ$  ( $c = 0.10$ ,  $\text{CHCl}_3$ );  $^1\text{H NMR}$  (400 MHz,  $\text{CDCl}_3$ )  $\delta$  8.06 – 7.93 (m, 2H), 7.60 (t,  $J = 7.4$  Hz, 1H), 7.49 (t,  $J = 7.6$  Hz, 2H), 3.93–3.81 (m, 1H), 3.80–3.67 (m, 1H), 3.35–3.22 (m, 2H), 2.25 (td,  $J = 14.2, 7.1$  Hz, 1H), 2.14–2.00 (m, 2H), 2.01–1.90 (m, 1H), 1.91–1.75 (m, 2H), 1.74–1.56 (m, 2H), 1.21 (ddd,  $J = 10.3, 6.7, 4.2$  Hz, 1H), 0.90–0.79 (m, 1H), 0.68 – 0.51 (m, 2H), 0.47 – 0.39 (m, 1H);  $^{13}\text{C NMR}$  (100 MHz,  $\text{CDCl}_3$ )  $\delta$  196.3, 136.4, 133.6, 128.8, 128.3, 60.7, 59.2, 36.7, 28.0, 26.2, 26.2, 25.9, 12.0, 6.5, 3.7; HPLC analysis: CHIRALPAK IA (Hexane/*i*-PrOH) = 80:20, flow rate = 1.0 mL/min, wave length = 254 nm, 30 °C,  $t_R = 7.583$  min (minor),  $t_R = 9.393$  min (major).

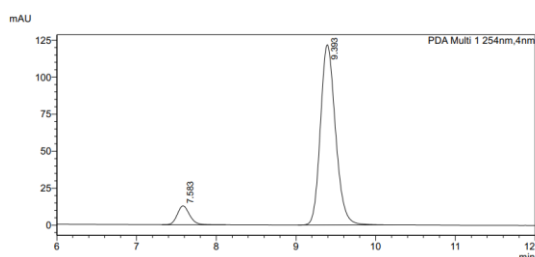

| PDA Ch1 254nm |           |         |        |        |
|---------------|-----------|---------|--------|--------|
| Peak#         | Ret. Time | Area    | Height | Aera%  |
| 1             | 7.583     | 137049  | 12808  | 7.880  |
| 2             | 9.393     | 1602170 | 121683 | 92.120 |

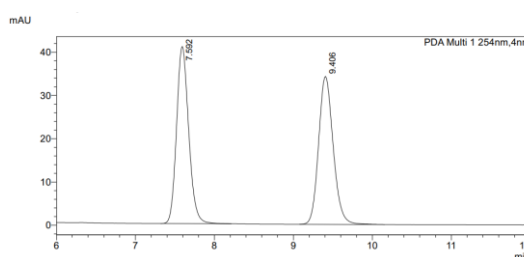

| PDA Ch1 254nm |           |        |        |        |
|---------------|-----------|--------|--------|--------|
| Peak#         | Ret. Time | Area   | Height | Aera%  |
| 1             | 7.592     | 437220 | 40928  | 49.873 |
| 2             | 9.406     | 439450 | 34173  | 50.127 |

**(S)-3-(cyclopentylsulfonyl)-1-phenyl-3-(tetrahydro-2H-pyran-4-yl)propan-1-one (5f)**

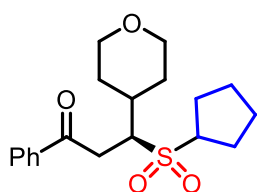

$[\alpha]_D^{20} = -9.4^\circ$  ( $c = 0.10$ ,  $\text{CHCl}_3$ );  $^1\text{H NMR}$  (400 MHz,  $\text{CDCl}_3$ )  $\delta$  8.02 (d,  $J = 7.5$  Hz, 2H), 7.63 (t,  $J = 7.4$  Hz, 1H), 7.51 (t,  $J = 7.7$  Hz, 2H), 3.98 (dd,  $J = 6.7, 3.4$  Hz, 3H), 3.77 (dd,  $J = 19.0, 6.7$  Hz, 1H), 3.50–3.36 (m, 3H), 3.25 (dd,  $J = 19.0, 3.9$  Hz, 1H), 2.64–2.58 (m, 1H), 2.17–2.04 (m, 3H), 1.94 (t,  $J = 10.7$  Hz, 2H), 1.86–1.74 (m, 2H), 1.70–1.40 (m, 5H);  $^{13}\text{C NMR}$  (100 MHz,  $\text{CDCl}_3$ )  $\delta$  196.4, 135.9, 133.9, 128.9, 128.3, 67.9, 67.6, 61.1, 58.7, 34.4, 33.8, 30.9, 28.4, 27.5, 26.2, 26.1, 26.0; HPLC analysis: CHIRALPAK AS-H (Hexane/*i*-PrOH) = 80:20, flow rate = 1.0 mL/min, wave length = 254 nm, 30 °C,  $t_R = 9.289$  min (major),  $t_R = 13.464$  min (minor).

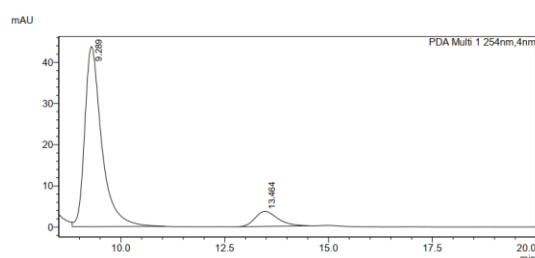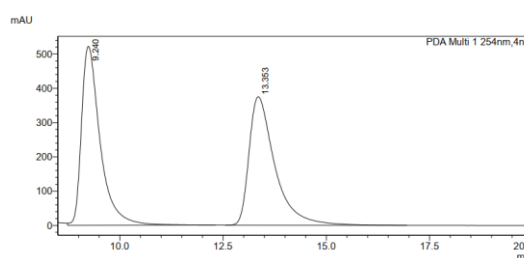

| PDA Ch1 254nm |           |         |        |        |
|---------------|-----------|---------|--------|--------|
| Peak#         | Ret. Time | Area    | Height | Aera%  |
| 1             | 9.289     | 1244536 | 43717  | 89.944 |
| 2             | 13.464    | 139146  | 3649   | 10.056 |

| PDA Ch1 254nm |           |          |        |        |
|---------------|-----------|----------|--------|--------|
| Peak#         | Ret. Time | Area     | Height | Aera%  |
| 1             | 9.240     | 16408297 | 522227 | 50.208 |
| 2             | 13.353    | 16272071 | 374383 | 49.792 |

**(R)-3-(cyclohexylsulfonyl)-1-phenylbutan-1-one (5g)**

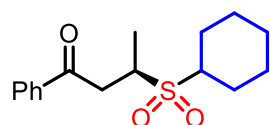

$[\alpha]_D^{20} = +7.3^\circ$  ( $c = 0.10$ ,  $\text{CHCl}_3$ );  $^1\text{H NMR}$  (400 MHz,  $\text{CDCl}_3$ )

$\delta$  8.07–7.92 (m, 2H), 7.61 (t,  $J = 7.4$  Hz, 1H), 7.49 (t,  $J = 7.7$  Hz, 2H), 3.95–3.90 (m, 1H), 3.72 (dd,  $J = 18.0, 3.2$  Hz, 1H), 3.22 (dd,  $J = 18.0, 9.2$  Hz, 1H), 3.03 (tt,  $J = 12.1, 3.4$  Hz, 1H), 2.17 (dd,  $J = 39.1, 12.8$  Hz, 2H), 1.96 (dd,  $J = 15.4, 7.4$  Hz, 2H), 1.77–1.55 (m, 3H), 1.43 (d,  $J = 6.8$  Hz, 3H), 1.36–1.22 (m, 3H);  $^{13}\text{C NMR}$  (100 MHz,  $\text{CDCl}_3$ )  $\delta$  196.1, 136.2, 133.8, 128.8, 128.2, 58.2, 49.5, 37.2, 25.6, 25.1, 25.1, 25.1, 23.9, 14.5; HRMS (ESI) calcd for  $\text{C}_{16}\text{H}_{22}\text{O}_3\text{NaS}$   $[\text{M}+\text{Na}]^+$ : 317.1187, found: 317.1192. HPLC analysis: CHIRALPAK IA (Hexane/*i*-PrOH) = 80:20, flow rate = 1.0 mL/min, wave length = 254 nm, 30 °C,  $t_R = 7.558$  min (minor),  $t_R = 8.480$  min (major).

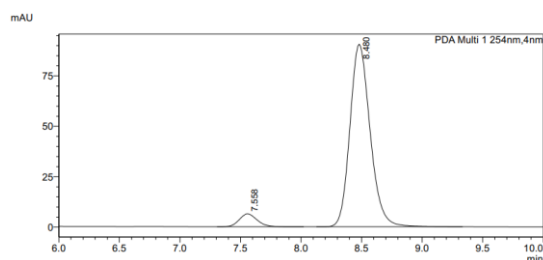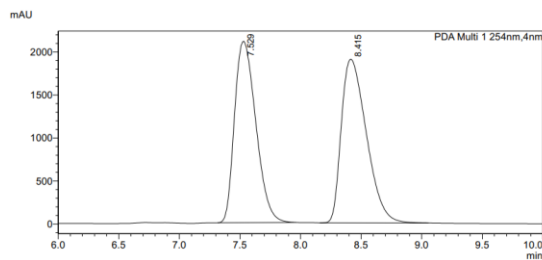

| PDA Ch1 254nm |           |         |        |        |
|---------------|-----------|---------|--------|--------|
| Peak#         | Ret. Time | Area    | Height | Aera%  |
| 1             | 7.558     | 65459   | 6359   | 5.844  |
| 2             | 8.480     | 1054689 | 90507  | 94.156 |

| PDA Ch1 254nm |           |          |         |        |
|---------------|-----------|----------|---------|--------|
| Peak#         | Ret. Time | Area     | Height  | Aera%  |
| 1             | 7.529     | 25922092 | 2110443 | 48.538 |
| 2             | 8.415     | 27483541 | 1905274 | 51.462 |

**(S)-3-(4-(tert-butyl)phenyl)-3-(cyclopentylsulfonyl)-1-phenylpropan-1-one (5h)**

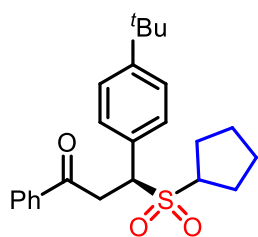

$[\alpha]_D^{20} = -65.9^\circ$  ( $c = 0.10$ ,  $\text{CHCl}_3$ );  $^1\text{H NMR}$  (400 MHz,  $\text{CDCl}_3$ )

$\delta$  7.95 (d,  $J = 7.5$  Hz, 2H), 7.55 (t,  $J = 7.4$  Hz, 1H), 7.49–7.41 (m, 4H), 7.37 (d,  $J = 8.3$  Hz, 2H), 4.96 (dd,  $J = 9.4, 3.3$  Hz, 1H), 4.07 (dd,  $J = 18.0, 3.3$  Hz, 1H), 3.81 (dd,  $J = 18.0, 9.5$  Hz, 1H), 3.10 (dd,  $J = 11.4, 4.2$  Hz, 1H), 2.20–1.90 (m, 3H), 1.88–1.67 (m, 3H), 1.66–1.48 (m, 2H), 1.29 (s, 9H);  $^{13}\text{C NMR}$  (100 MHz,  $\text{CDCl}_3$ )  $\delta$  195.3, 152.0, 136.2, 133.6, 130.4, 129.1, 128.7, 128.2, 126.0, 61.5, 58.2, 37.0, 34.6, 31.2,



28.0, 26.2, 26.1, 25.5; HPLC analysis: CHIRALPAK AS-H (Hexane/*i*-PrOH) = 80:20, flow rate = 1.0 mL/min, wave length = 254 nm, 30 °C,  $t_R$  = 8.438 min (major),  $t_R$  = 11.885 min (minor).

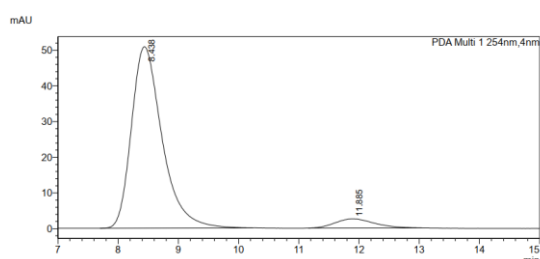

| PDA Ch1 254nm |           |         |        |        |
|---------------|-----------|---------|--------|--------|
| Peak#         | Ret. Time | Area    | Height | Aera%  |
| 1             | 8.438     | 1803285 | 50836  | 93.834 |
| 2             | 11.885    | 118507  | 2583   | 6.166  |

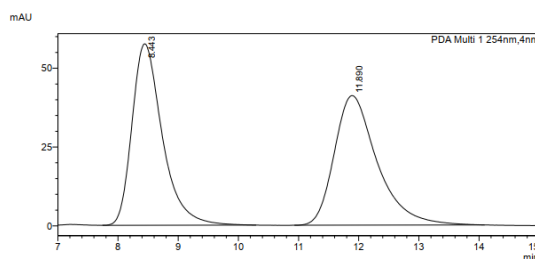

| PDA Ch1 254nm |           |         |        |        |
|---------------|-----------|---------|--------|--------|
| Peak#         | Ret. Time | Area    | Height | Aera%  |
| 1             | 8.443     | 2017230 | 57513  | 49.733 |
| 2             | 11.890    | 2038927 | 41069  | 50.267 |

**(S)-3-(cyclopentylsulfonyl)-1-phenyl-3-(4-(trifluoromethyl)phenyl)propan-1-one (5i)**

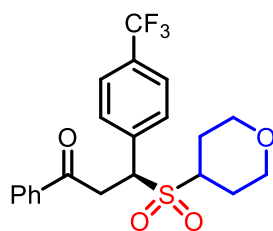

$[\alpha]_D^{20}$  = -10.3° (c = 0.10, CHCl<sub>3</sub>); <sup>1</sup>H NMR (400 MHz, CDCl<sub>3</sub>) δ 7.94 (d, *J* = 7.4 Hz, 2H), 7.71 (d, *J* = 8.2 Hz, 2H), 7.64 (d, *J* = 8.3 Hz, 2H), 7.59 (t, *J* = 7.4 Hz, 1H), 7.46 (t, *J* = 7.7 Hz, 2H), 5.01 (dd, *J* = 9.9, 3.2 Hz, 1H), 4.12 (dd, *J* = 18.1, 3.2 Hz, 1H), 3.83 (dd, *J* = 18.1, 9.9 Hz, 1H), 3.06 (t, *J* = 7.9 Hz, 1H), 2.10 (dt, *J* = 19.8, 6.4 Hz, 2H), 1.96 (d, *J* = 8.3 Hz, 1H), 1.88–1.71 (m, 3H), 1.67–1.46 (m, 2H); <sup>13</sup>C NMR (100 MHz, CDCl<sub>3</sub>) δ 194.9, 137.7, 135.9, 133.9, 131.3, 131.0, 130.1, 128.8, 128.2, 126.0, 126.0, 125.1, 122.4, 61.6, 58.8, 37.2, 28.0, 26.1, 26.0, 25.6; HPLC analysis: CHIRALPAK AS-H (Hexane/*i*-PrOH) = 80:20, flow rate = 1.0 mL/min, wave length = 254 nm, 30 °C,  $t_R$  = 9.324 min (major),  $t_R$  = 11.678 min (minor).

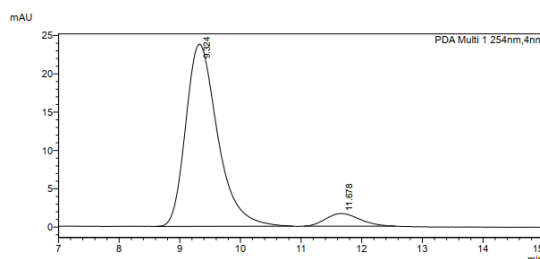

| PDA Ch1 254nm |           |        |        |        |
|---------------|-----------|--------|--------|--------|
| Peak#         | Ret. Time | Area   | Height | Aera%  |
| 1             | 9.324     | 869132 | 23774  | 93.127 |
| 2             | 11.678    | 64145  | 1648   | 6.873  |

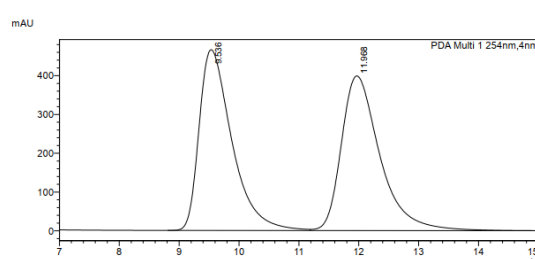

| PDA Ch1 254nm |           |          |        |        |
|---------------|-----------|----------|--------|--------|
| Peak#         | Ret. Time | Area     | Height | Aera%  |
| 1             | 9.536     | 17715041 | 465887 | 49.816 |
| 2             | 11.968    | 17845892 | 398496 | 50.184 |

**(S)-3-(cyclopentylsulfonyl)-3-phenyl-1-(thiophen-3-yl)propan-1-one (5j)**

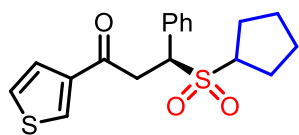

$[\alpha]_D^{20} = -45.1^\circ$  ( $c = 0.10$ ,  $\text{CHCl}_3$ );  $^1\text{H NMR}$  (400 MHz,  $\text{CDCl}_3$ )  $\delta$  7.96 (d,  $J = 7.6$  Hz, 2H), 7.58 (t,  $J = 7.4$  Hz, 1H), 7.46 (t,  $J = 7.7$  Hz, 2H), 7.32 (d,  $J = 5.1$  Hz, 1H), 7.00 (dd,  $J = 4.8, 3.9$  Hz, 1H), 5.26 (dd,  $J = 9.7, 3.2$  Hz, 1H), 4.05 (dd,  $J = 17.8, 3.3$  Hz, 1H), 3.82 (dd,  $J = 17.8, 9.7$  Hz, 1H), 3.27 (t,  $J = 7.8$  Hz, 1H), 2.17–1.97 (m, 3H), 1.89–1.72 (m, 3H), 1.69–1.52 (m, 2H);  $^{13}\text{C NMR}$  (100 MHz,  $\text{CDCl}_3$ )  $\delta$  194.9, 136.1, 135.3, 133.8, 128.8, 128.2, 127.3, 127.1, 58.1, 57.6, 38.0, 28.2, 26.1, 26.1, 25.5; HPLC analysis: CHIRALPAK IA (Hexane/*i*-PrOH) = 80:20, flow rate = 1.0 mL/min, wave length = 254 nm, 30 °C,  $t_R = 13.506$  min (major),  $t_R = 14.712$  min (minor).

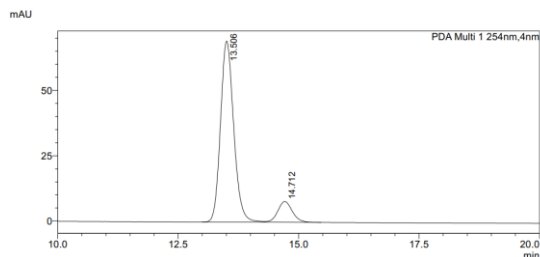

| PDA Ch1 254nm |           |         |        |        |
|---------------|-----------|---------|--------|--------|
| Peak#         | Ret. Time | Area    | Height | Aera%  |
| 1             | 13.506    | 1319279 | 69238  | 88.735 |
| 2             | 14.712    | 167488  | 7950   | 11.265 |

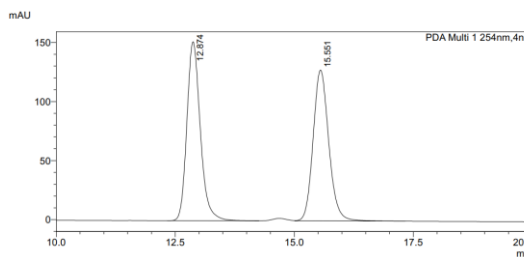

| PDA Ch1 254nm |           |         |        |        |
|---------------|-----------|---------|--------|--------|
| Peak#         | Ret. Time | Area    | Height | Aera%  |
| 1             | 12.874    | 2976074 | 151565 | 50.443 |
| 2             | 15.551    | 2923850 | 127887 | 49.557 |

**(S)-3-(cyclopentylsulfonyl)-1,3-bis(4-fluorophenyl)propan-1-one (5k)**

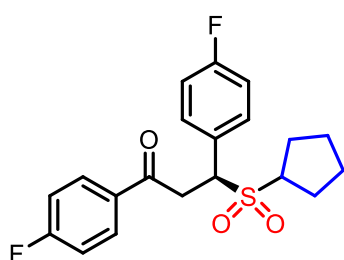

$[\alpha]_D^{20} = -39.8^\circ$  ( $c = 0.10$ ,  $\text{CHCl}_3$ );  $^1\text{H NMR}$  (400 MHz,  $\text{CDCl}_3$ )  $\delta$  8.03 – 7.91 (m, 2H), 7.54 (dd,  $J = 8.6, 5.3$  Hz, 2H), 7.10 (dt,  $J = 21.3, 8.6$  Hz, 4H), 4.93 (dd,  $J = 9.7, 3.3$  Hz, 1H), 4.05 (dd,  $J = 17.9, 3.3$  Hz, 1H), 3.73 (dd,  $J = 17.9, 9.7$  Hz, 1H), 3.08 (dd,  $J = 11.5, 4.2$  Hz, 1H), 2.15–1.99 (m, 2H), 1.98–1.93 (m, 1H), 1.86–1.68 (m, 3H), 1.64–1.52 (m, 2H);  $^{13}\text{C NMR}$  (100 MHz,  $\text{CDCl}_3$ )  $\delta$  193.6, 167.4, 164.8, 164.3, 161.8, 132.5, 132.5, 131.4, 131.3, 130.9, 130.8, 129.4, 129.3, 116.3, 116.1, 115.8, 61.2, 58.5, 37.1, 27.9, 26.1, 26.0, 25.6; HPLC analysis: CHIRALPAK IA (Hexane/*i*-PrOH) = 80:20, flow rate =

1.0 mL/min, wave length = 254 nm, 30 °C,  $t_R = 13.897$  min (major),  $t_R = 15.322$  min (minor).

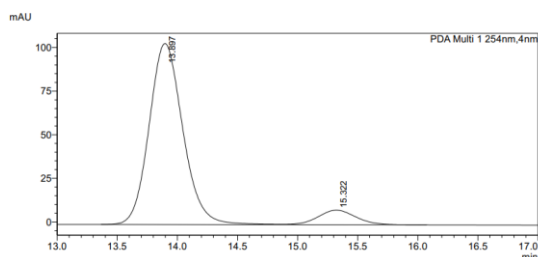

| PDA Ch1 254nm |           |         |        |        |
|---------------|-----------|---------|--------|--------|
| Peak#         | Ret. Time | Area    | Height | Aera%  |
| 1             | 13.897    | 2025819 | 103785 | 91.678 |
| 2             | 15.322    | 183900  | 8344   | 8.322  |

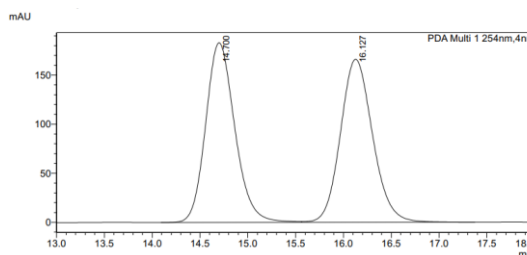

| PDA Ch1 254nm |           |         |        |        |
|---------------|-----------|---------|--------|--------|
| Peak#         | Ret. Time | Area    | Height | Aera%  |
| 1             | 14.700    | 3884146 | 183079 | 49.913 |
| 2             | 16.127    | 3897634 | 166206 | 50.087 |

***(S)*-1,3-bis(4-chlorophenyl)-3-(cyclopentylsulfonyl)propan-1-one (5l)**

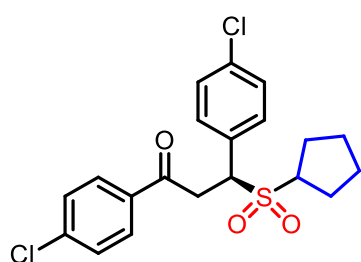

$[\alpha]_D^{20} = -69.3^\circ$  ( $c = 0.10$ ,  $\text{CHCl}_3$ );  $^1\text{H NMR}$  (400 MHz,  $\text{CDCl}_3$ )  $\delta$  7.88 (d,  $J = 8.4$  Hz, 2H), 7.49 (d,  $J = 8.4$  Hz, 2H), 7.43 (d,  $J = 8.4$  Hz, 2H), 7.36 (d,  $J = 8.3$  Hz, 2H), 4.89 (dd,  $J = 9.7, 3.0$  Hz, 1H), 4.04 (dd,  $J = 18.0, 3.1$  Hz, 1H), 3.72 (dd,  $J = 18.0, 9.8$  Hz, 1H), 3.15 – 3.00 (m, 1H), 2.07 (dd,  $J = 14.9, 7.6$  Hz, 2H), 1.94 (dd,  $J = 13.4, 5.4$  Hz, 1H), 1.77 (dd,  $J = 8.0, 3.9$  Hz, 3H), 1.66–1.49 (m, 2H);  $^{13}\text{C NMR}$  (100 MHz,  $\text{CDCl}_3$ )  $\delta$  193.9, 140.4, 135.2, 134.3, 132.0, 130.8, 129.6, 129.4, 129.1, 61.3, 58.6, 37.1, 27.9, 26.1, 26.0, 25.6; HPLC analysis: CHIRALPAK IA (Hexane/*i*-PrOH) = 80:20, flow rate = 1.0 mL/min, wave length = 254 nm, 30 °C,  $t_R = 15.566$  min (major),  $t_R = 20.559$  min (minor).

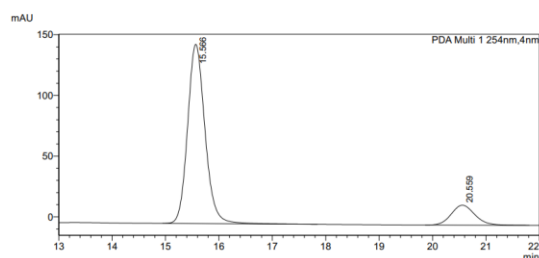

| PDA Ch1 254nm |           |         |        |        |
|---------------|-----------|---------|--------|--------|
| Peak#         | Ret. Time | Area    | Height | Aera%  |
| 1             | 15.566    | 3354521 | 147690 | 86.913 |
| 2             | 20.559    | 505115  | 16412  | 13.087 |

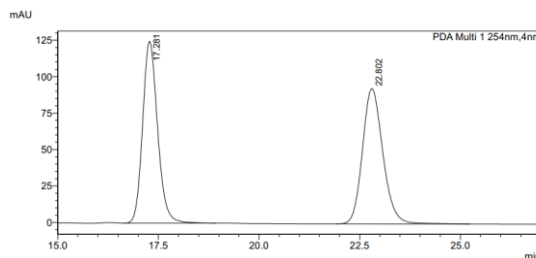

| PDA Ch1 254nm |           |         |        |        |
|---------------|-----------|---------|--------|--------|
| Peak#         | Ret. Time | Area    | Height | Aera%  |
| 1             | 17.281    | 3238864 | 124831 | 49.699 |
| 2             | 22.802    | 3278042 | 92849  | 50.301 |

***(S)*-3-(cyclopentylsulfonyl)-1,3-di-*p*-tolylpropan-1-one (5m)**

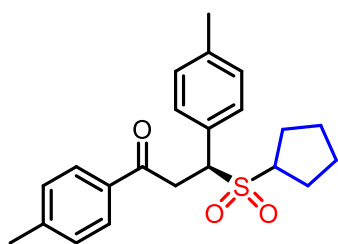

$[\alpha]_D^{20} = -54.9^\circ$  ( $c = 0.10$ ,  $\text{CHCl}_3$ );  $^1\text{H NMR}$  (400 MHz,  $\text{CDCl}_3$ )  $\delta$  7.84 (d,  $J = 8.2$  Hz, 2H), 7.42 (d,  $J = 8.0$  Hz, 2H), 7.27–7.20 (m, 2H), 7.16 (d,  $J = 7.9$  Hz, 2H), 4.91 (dd,  $J = 9.8, 3.2$  Hz, 1H), 4.01 (dd,  $J = 17.8, 3.3$  Hz, 1H), 3.79 (dd,  $J = 17.8, 9.8$  Hz, 1H), 3.14–3.00 (m, 1H), 2.39 (s, 3H), 2.32 (s, 3H), 2.16–2.02 (m, 2H), 1.99–1.90 (m, 1H), 1.85–1.68 (m, 3H), 1.61–1.47 (m, 2H);  $^{13}\text{C NMR}$  (100 MHz,  $\text{CDCl}_3$ )  $\delta$  194.9, 144.5, 138.9, 133.8, 130.5, 129.7, 129.4, 128.3, 61.8, 58.3, 36.8, 28.0, 26.1, 26.1, 25.5, 21.7, 21.2; HRMS (ESI) calcd for  $\text{C}_{22}\text{H}_{26}\text{O}_3\text{NaS}$   $[\text{M}+\text{Na}]^+$ : 393.1500, found: 393.1497; HPLC analysis: CHIRALPAK IA (Hexane/*i*-PrOH) = 80:20, flow rate = 1.0 mL/min, wave length = 254 nm, 30 °C,  $t_R = 12.869$  min (major),  $t_R = 19.335$  min (minor).

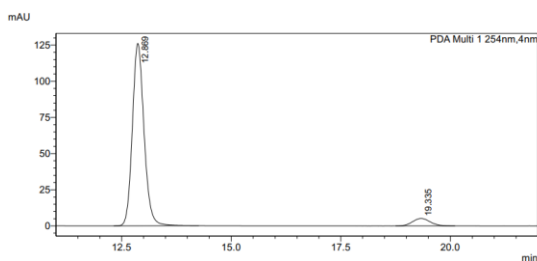

| PDA Ch1 254nm |           |         |        |        |
|---------------|-----------|---------|--------|--------|
| Peak#         | Ret. Time | Area    | Height | Aera%  |
| 1             | 12.869    | 2340525 | 125959 | 94.162 |
| 2             | 19.335    | 145101  | 5204   | 5.838  |

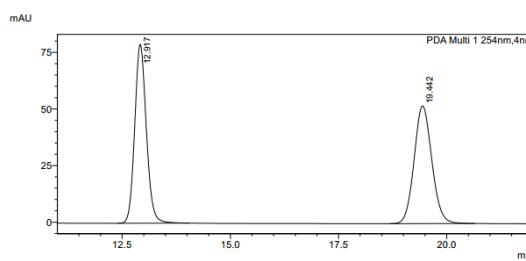

| PDA Ch1 254nm |           |         |        |        |
|---------------|-----------|---------|--------|--------|
| Peak#         | Ret. Time | Area    | Height | Aera%  |
| 1             | 12.917    | 1479776 | 79007  | 49.966 |
| 2             | 19.442    | 1481816 | 51997  | 50.034 |

### *(S)*-3-(cyclopentylsulfonyl)-*N*-(4-methoxyphenyl)butanamide (*3b'*)

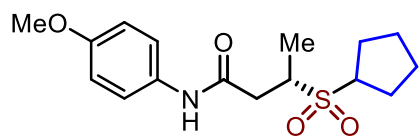

$[\alpha]_D^{20} = -2.4^\circ$  ( $c = 0.24$ ,  $\text{CHCl}_3$ );  $^1\text{H NMR}$  (400 MHz,  $\text{CDCl}_3$ )  $\delta$  8.1 (s, 1H), 7.43 (d,  $J = 8.9$  Hz, 2H), 6.84 (d,  $J = 8.9$  Hz, 2H), 3.82–3.70 (m, 4H), 3.58–3.49 (m, 1H), 3.12 (dd,  $J = 15.4, 4.3$  Hz, 1H), 2.56 (dd,  $J = 15.4, 9.1$  Hz, 1H), 2.21–1.94 (m, 4H), 1.89–1.75 (m, 2H), 1.72–1.61 (m, 2H), 1.46 (d,  $J = 6.8$  Hz, 3H);  $^{13}\text{C NMR}$  (100 MHz,  $\text{CDCl}_3$ )  $\delta$  167.2, 156.5, 130.9, 121.7, 114.1, 58.6, 55.4, 52.7, 36.1, 27.2, 26.3, 26.0, 26.0, 14.2; HRMS (ESI) calcd for  $\text{C}_{16}\text{H}_{23}\text{NO}_4\text{NaS}$   $[\text{M}+\text{Na}]^+$ : 348.1245, found: 348.1254; HPLC analysis: CHIRALPAK IA (Hexane/*i*-PrOH) = 80:20, flow rate = 1.0 mL/min, wave length = 254 nm, 30 °C,  $t_R = 16.941$  min (major),  $t_R = 26.924$  min (minor).

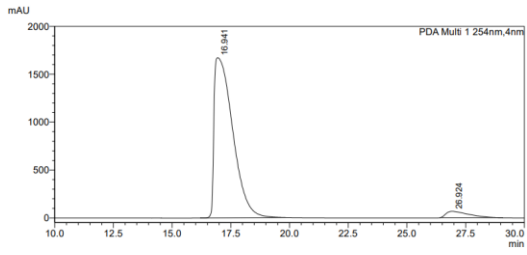

PDA Ch1 254nm

| Peak# | Ret. Time | Area     | Height  | Aera%  |
|-------|-----------|----------|---------|--------|
| 1     | 16.941    | 92473846 | 1672700 | 95.381 |
| 2     | 26.924    | 4477926  | 66711   | 4.619  |

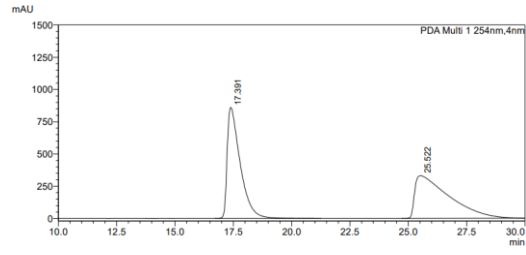

PDA Ch1 254nm

| Peak# | Ret. Time | Area     | Height | Aera%  |
|-------|-----------|----------|--------|--------|
| 1     | 17.391    | 33461197 | 860723 | 49.719 |
| 2     | 25.522    | 33839386 | 331255 | 50.281 |

## 7. NMR spectra of compounds

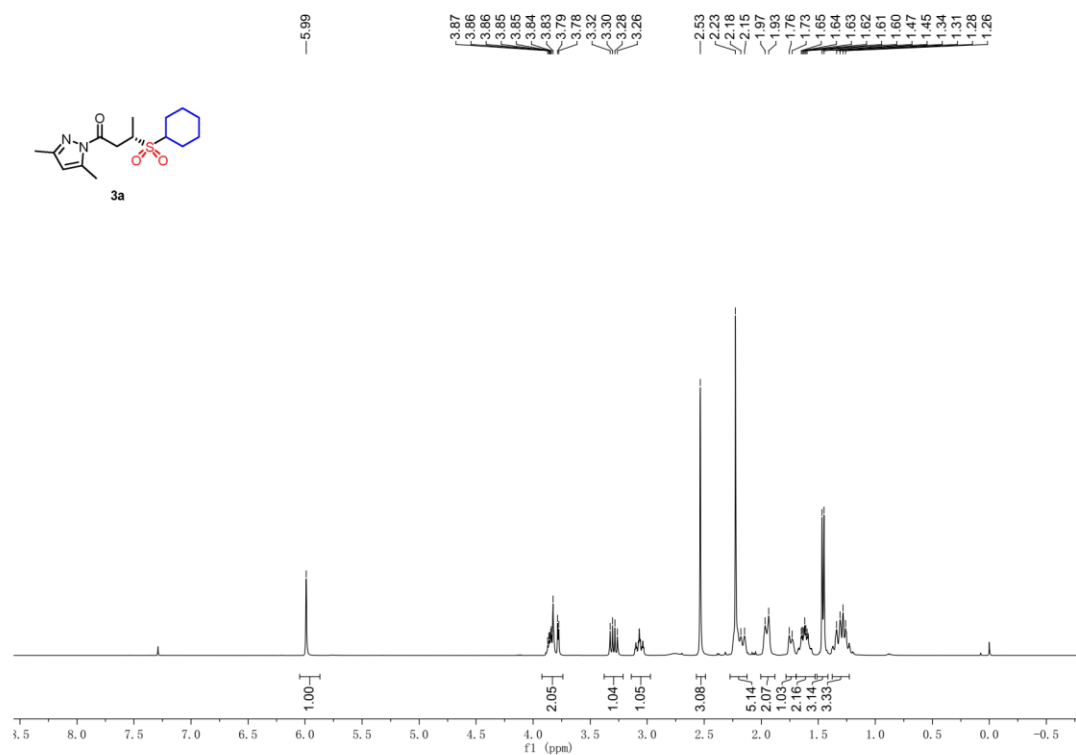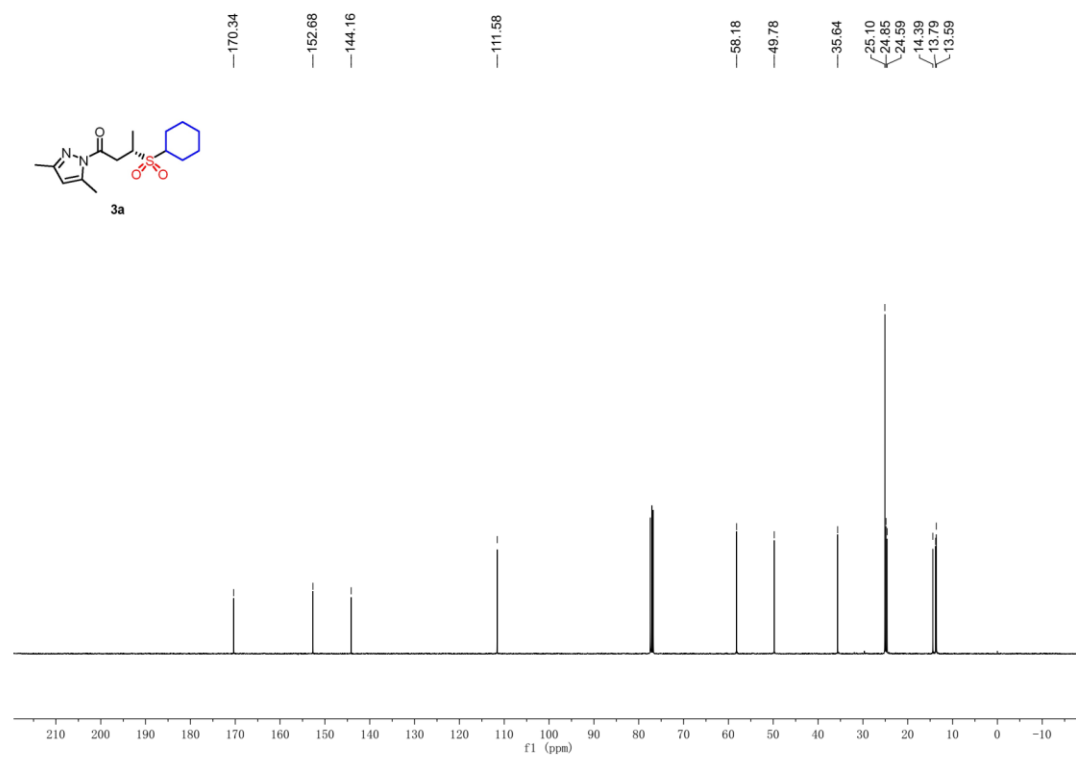

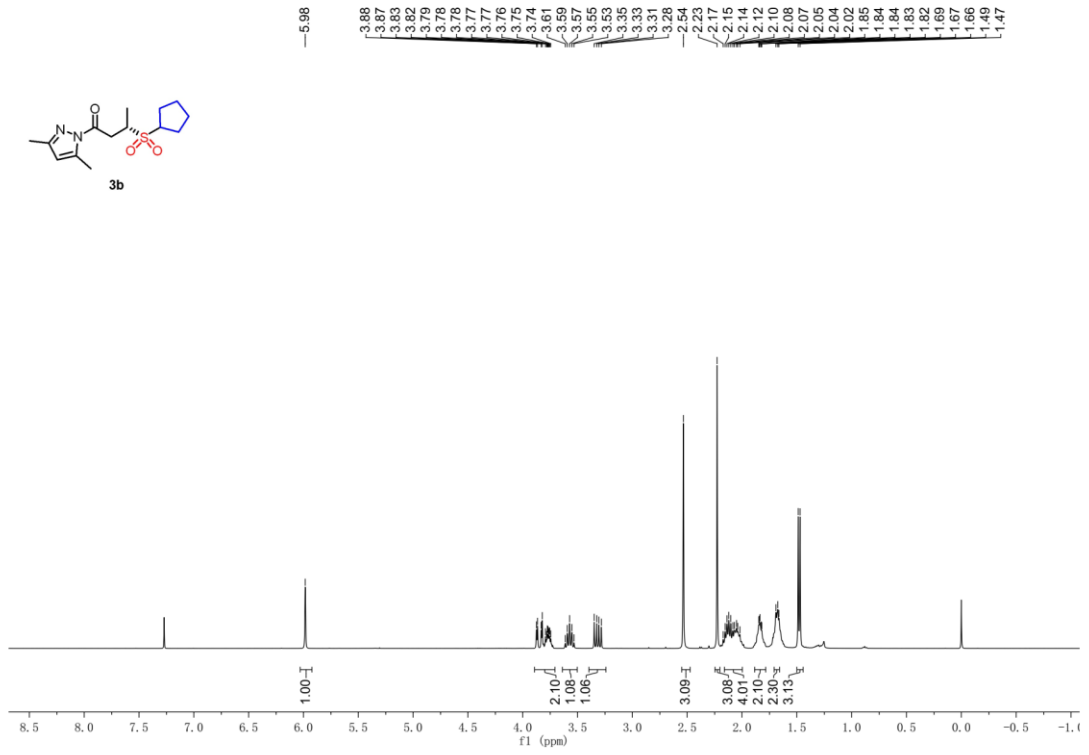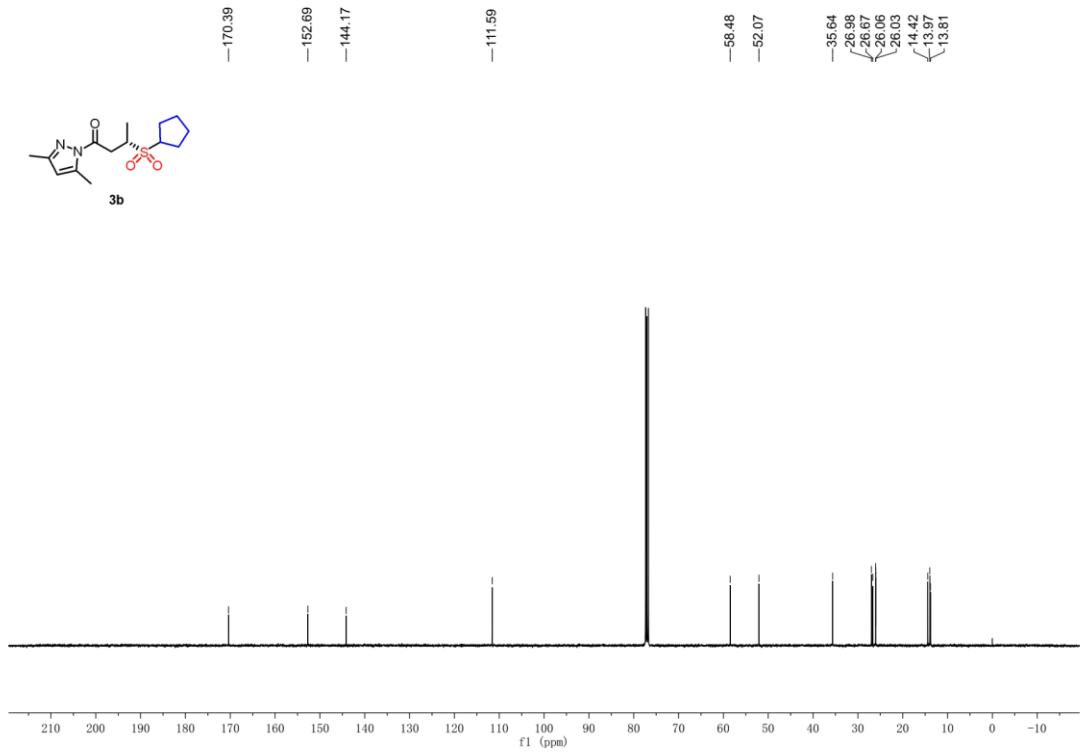

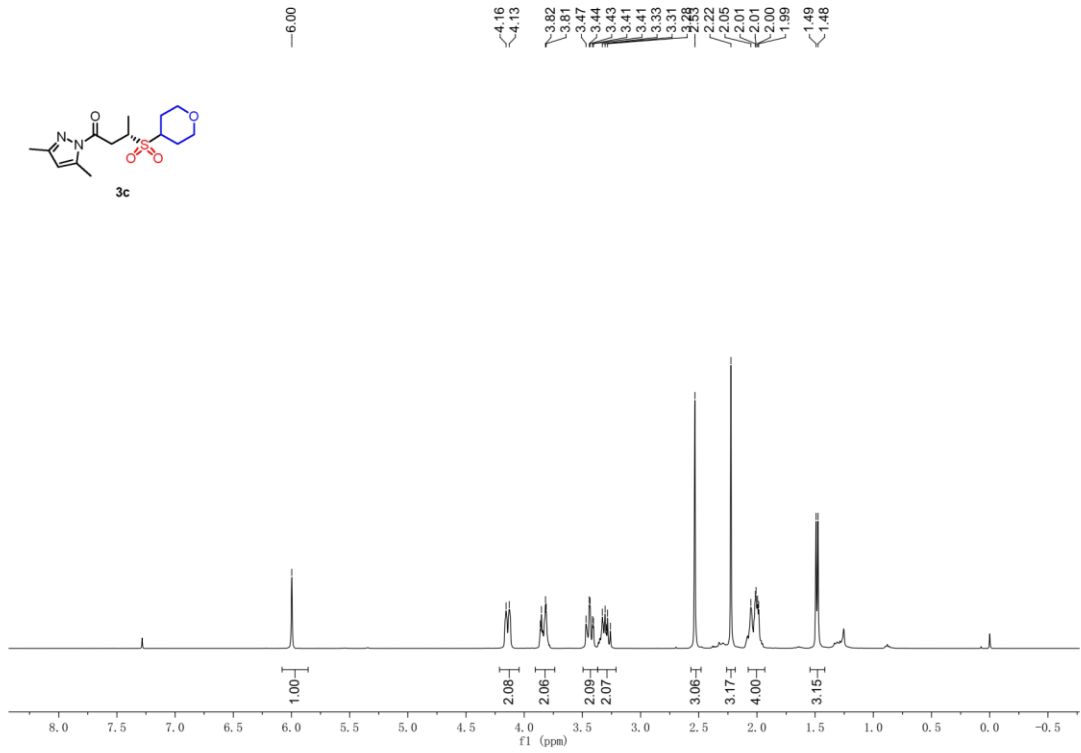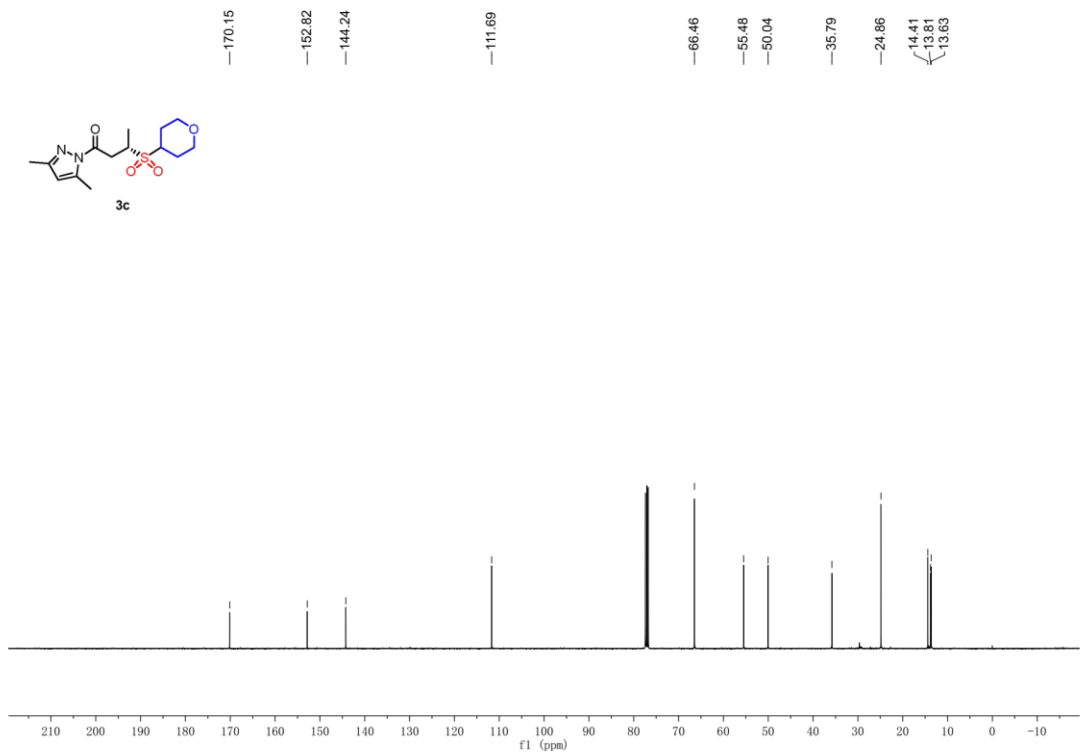



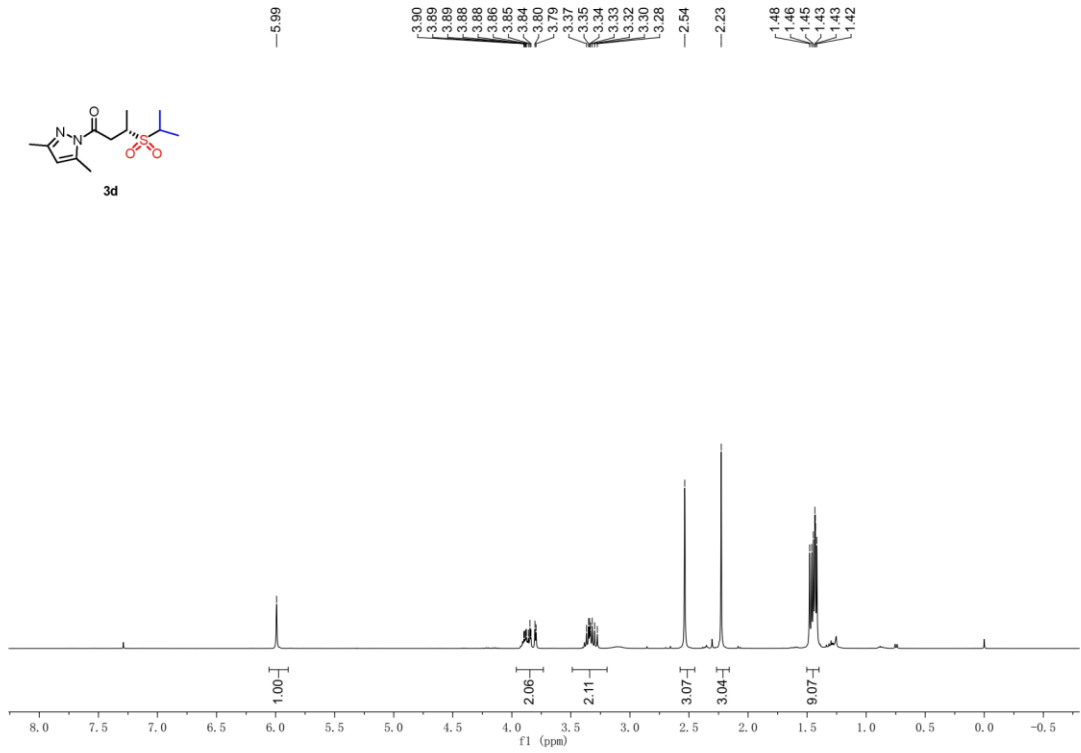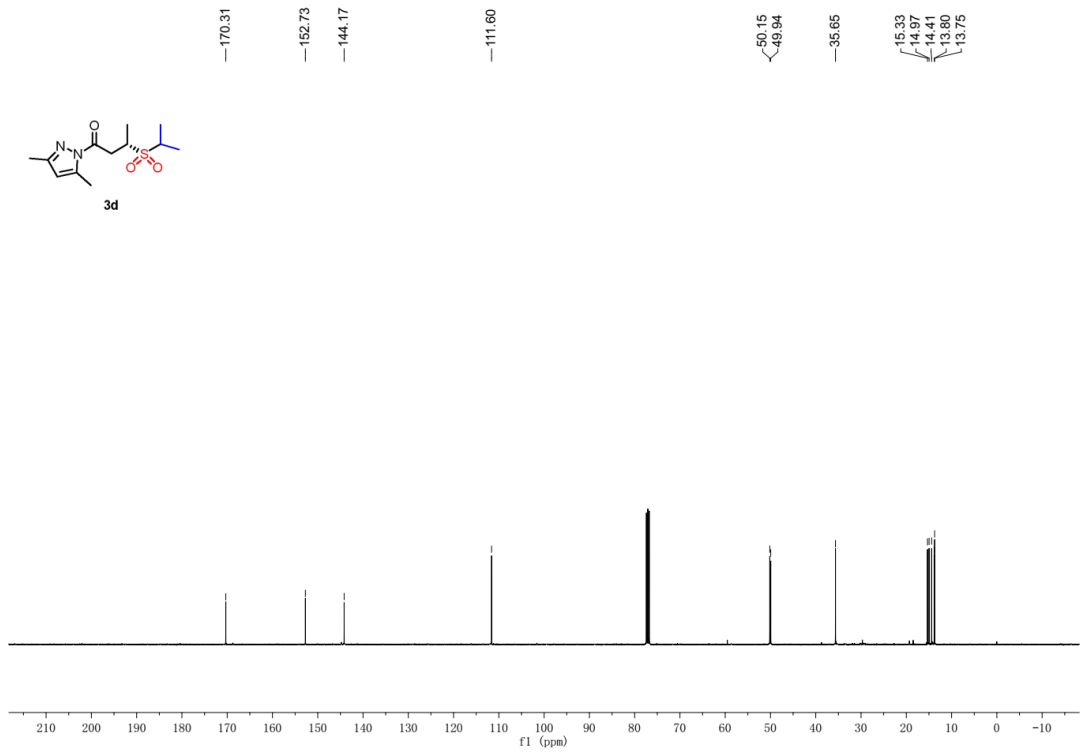

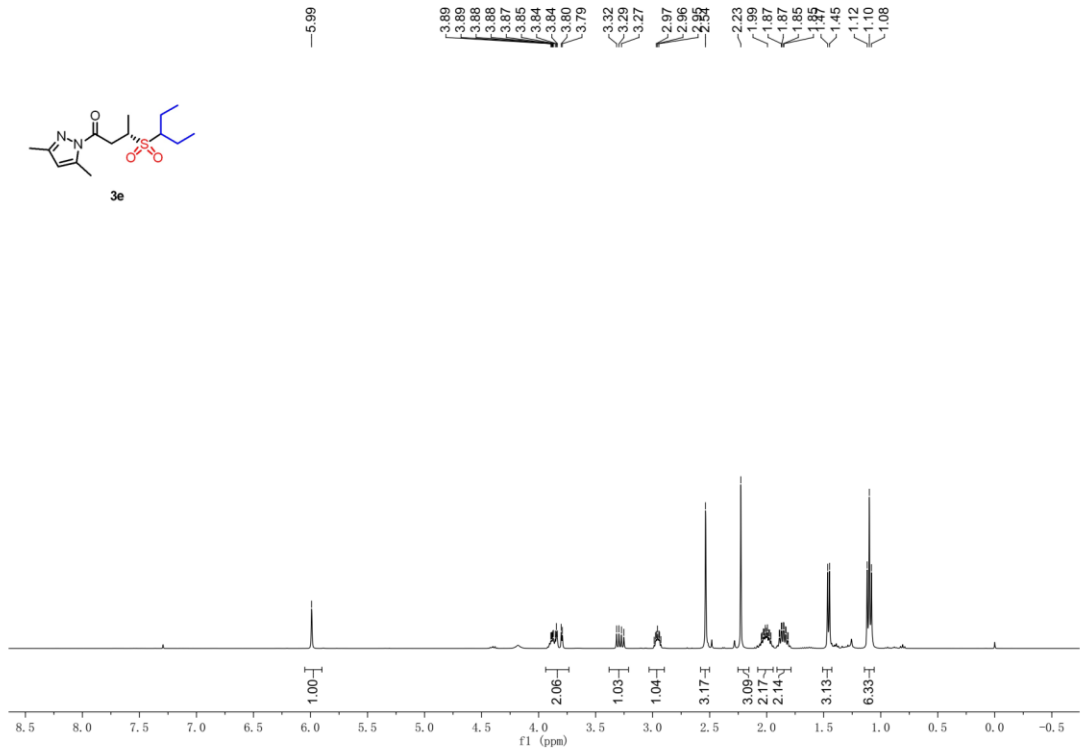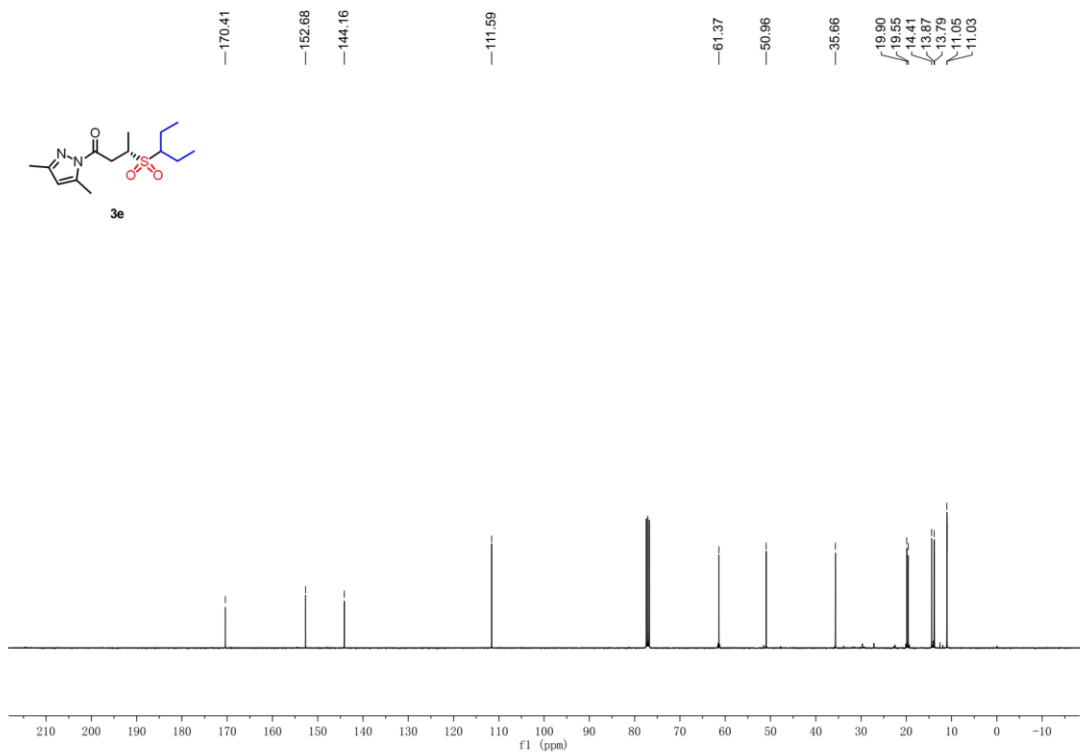

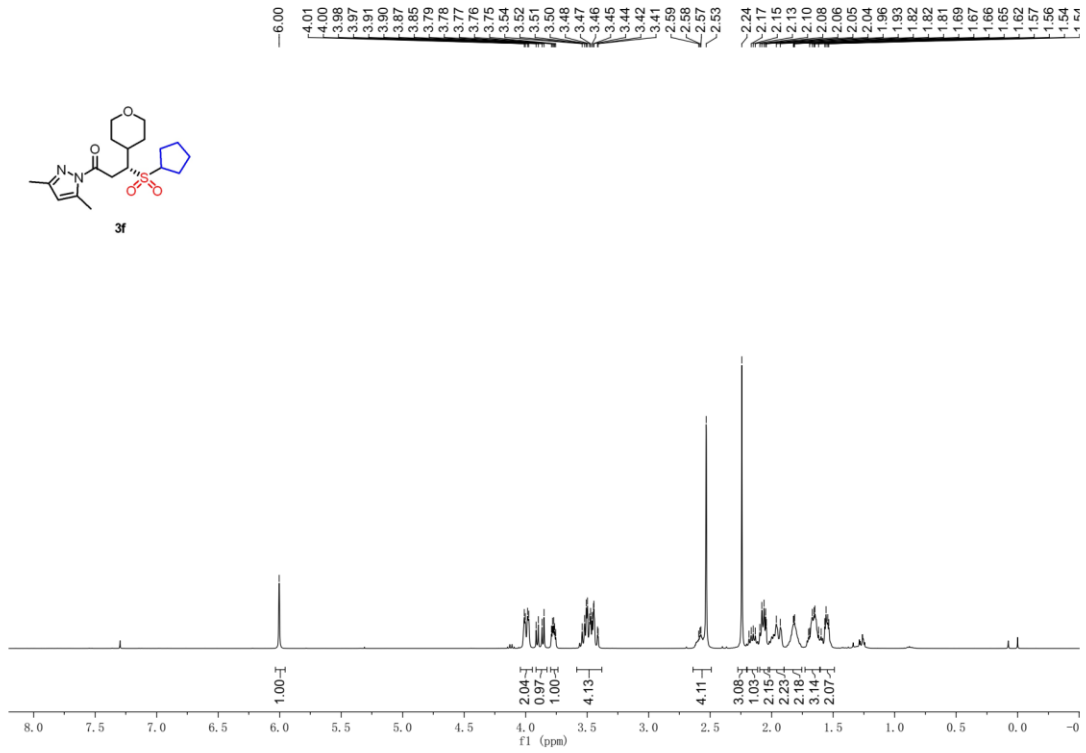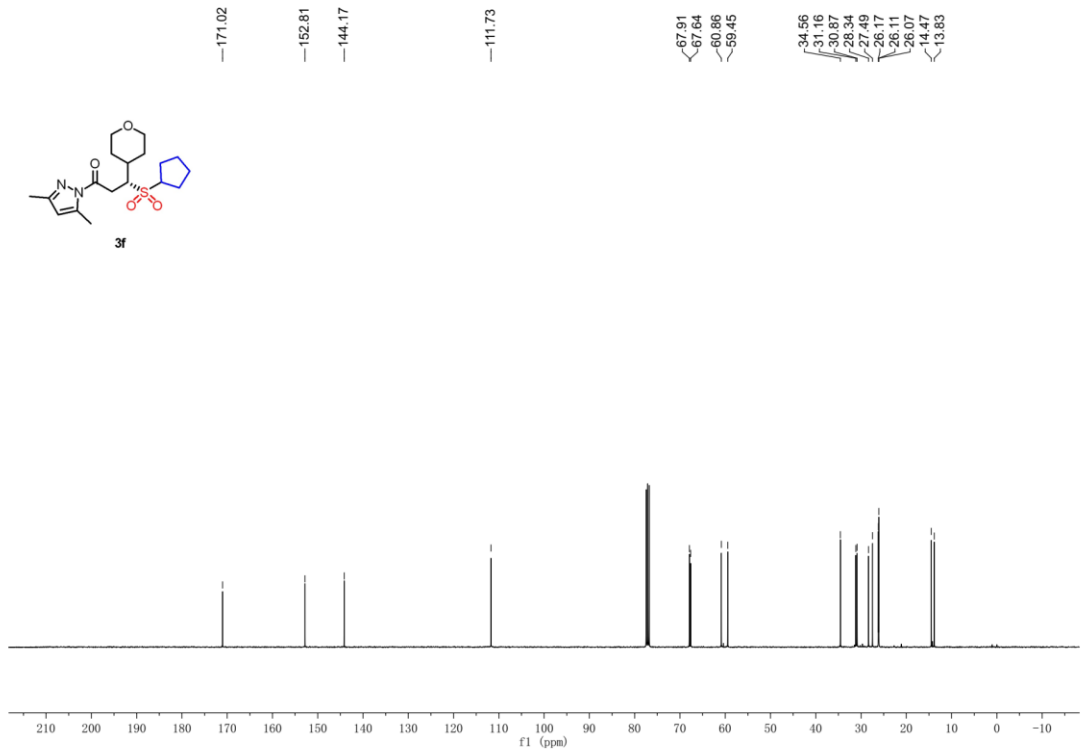

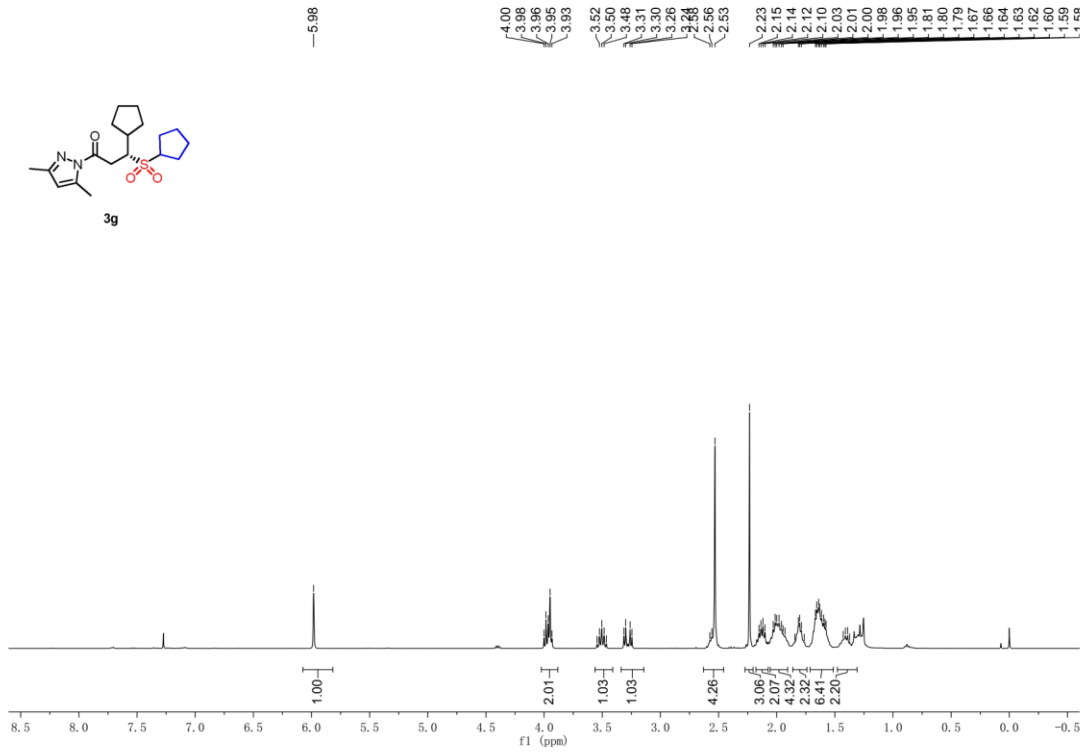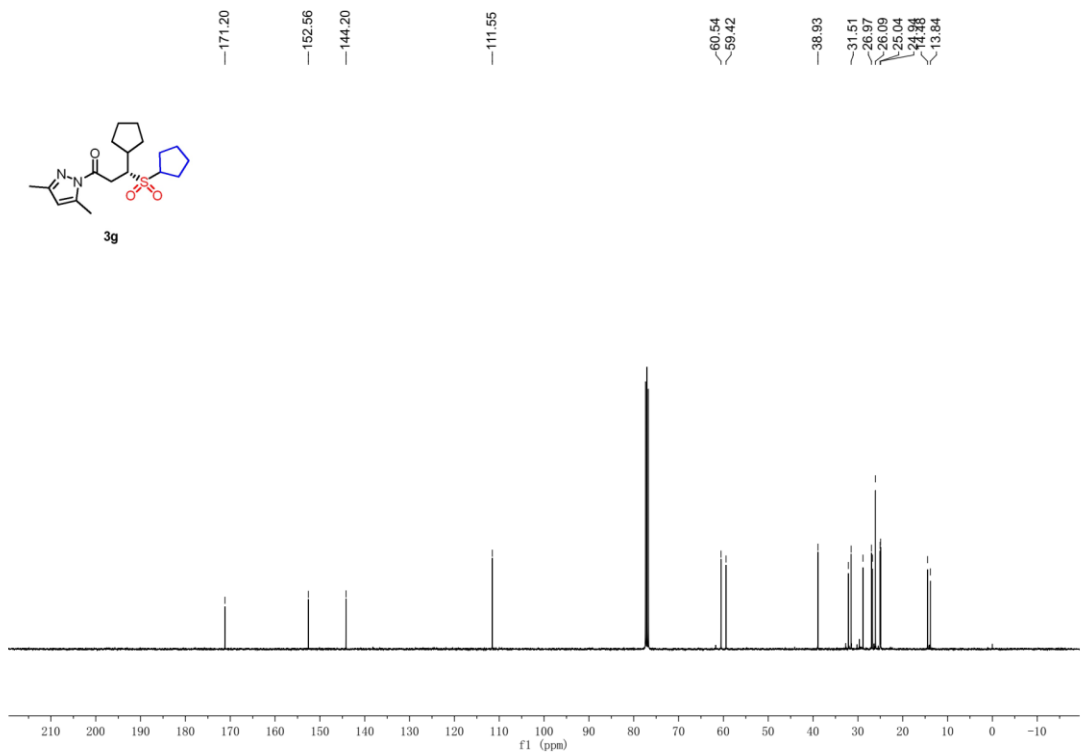

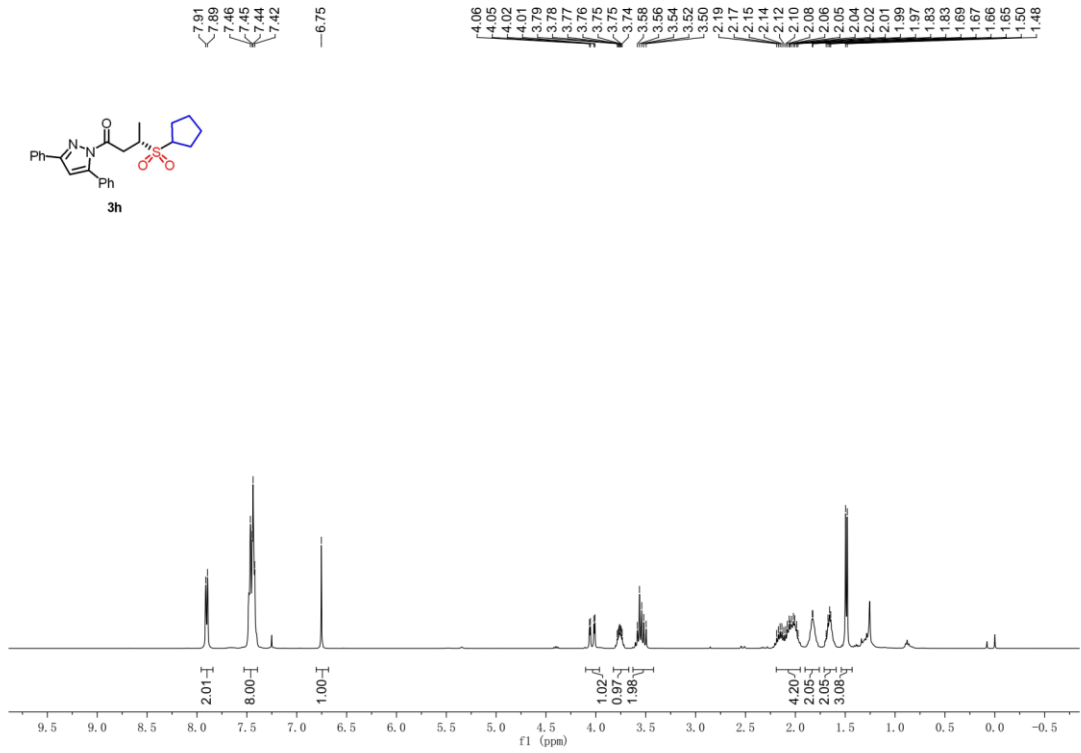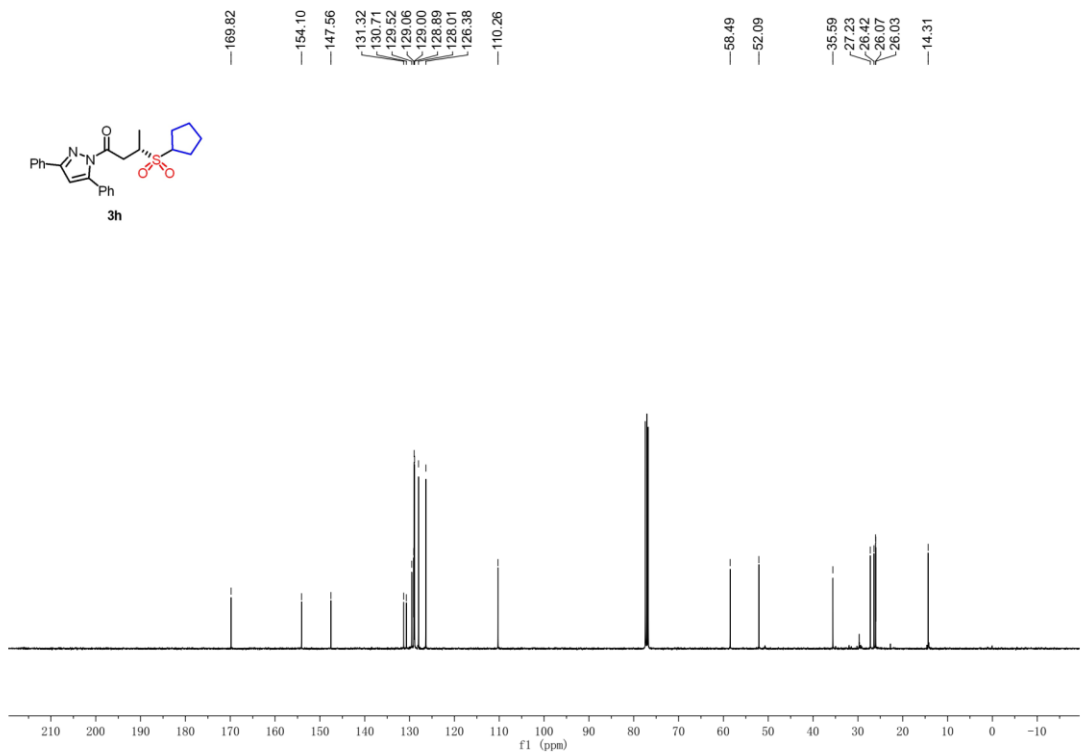

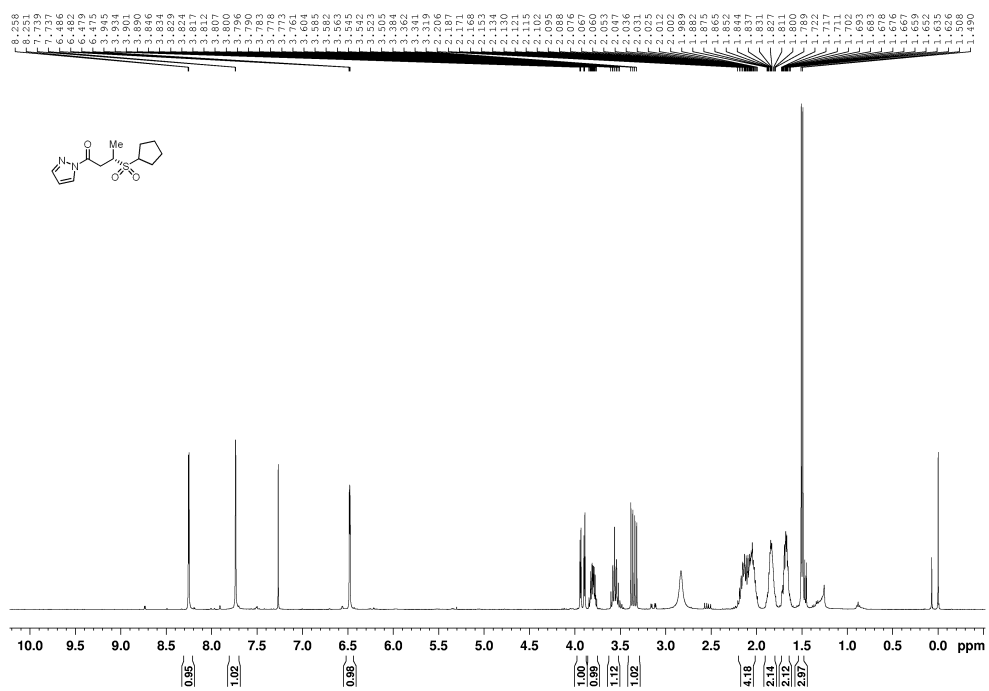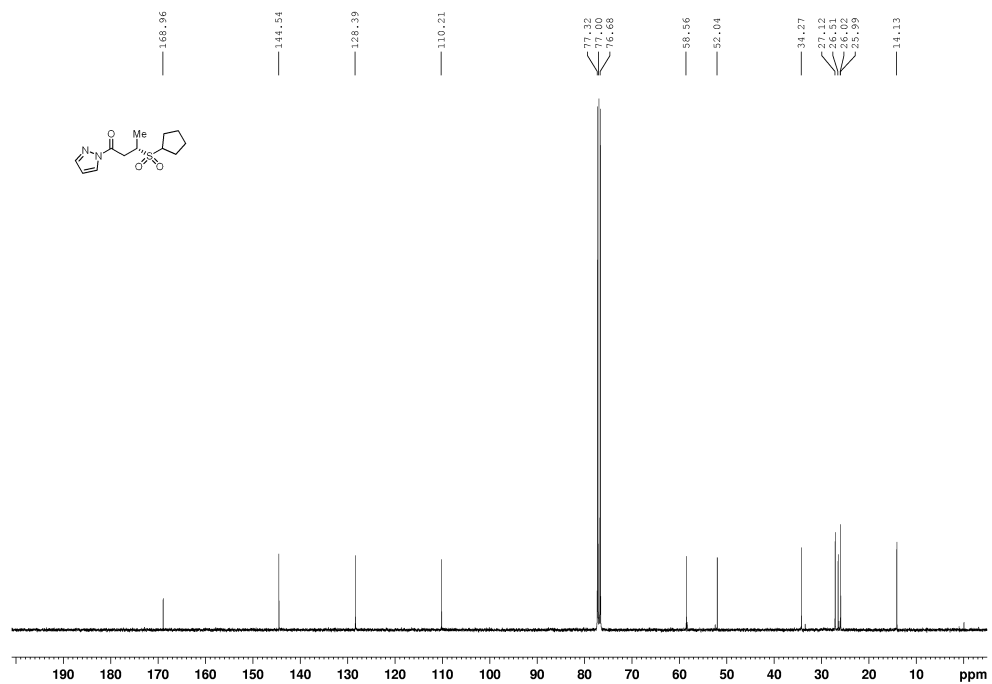

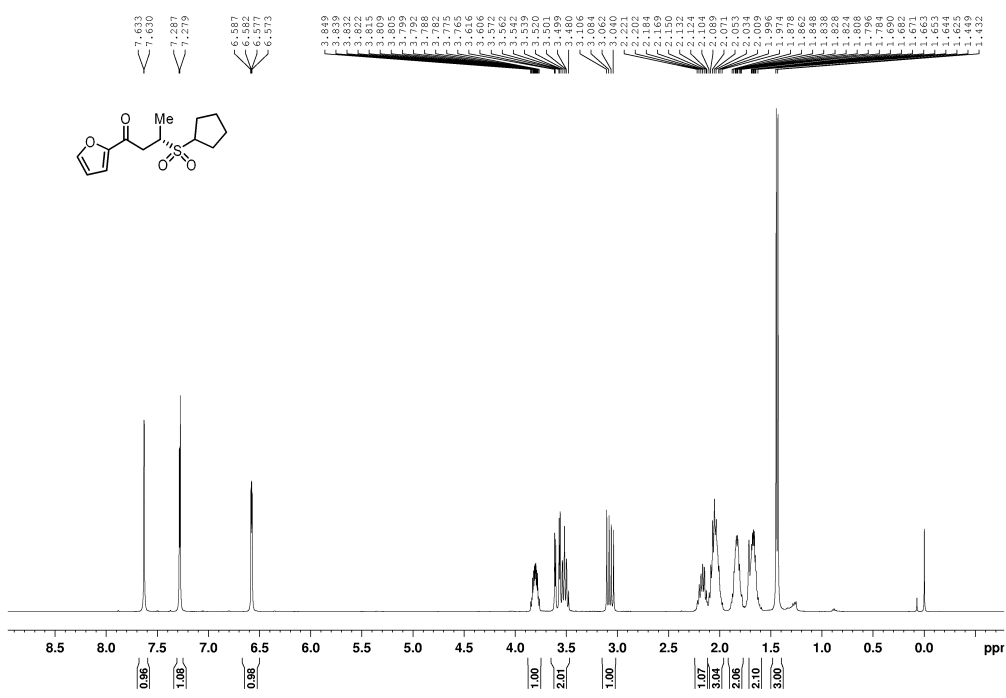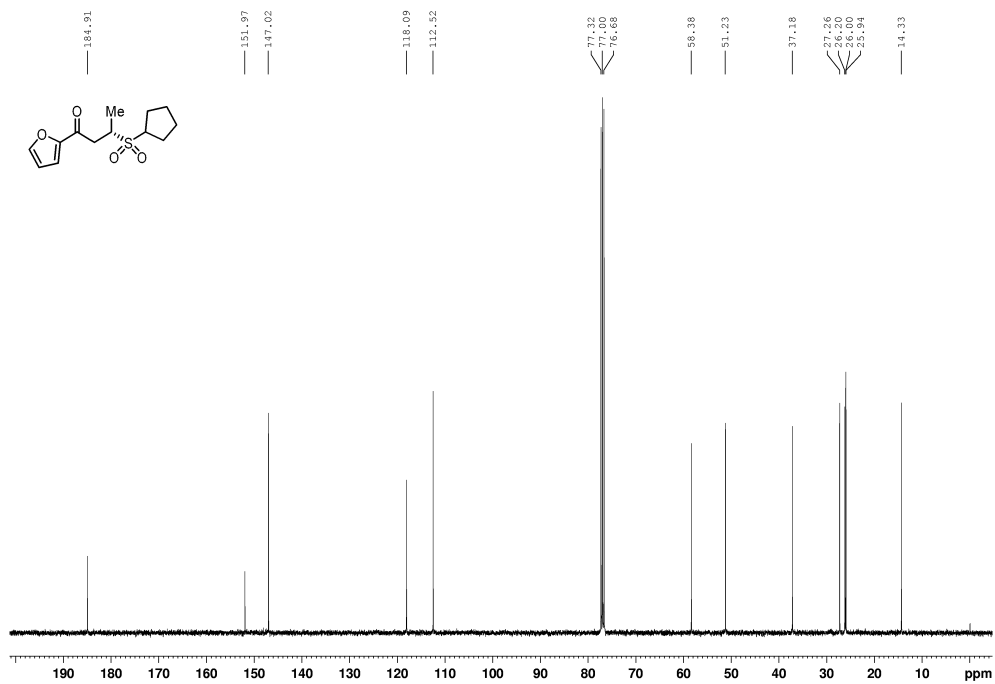

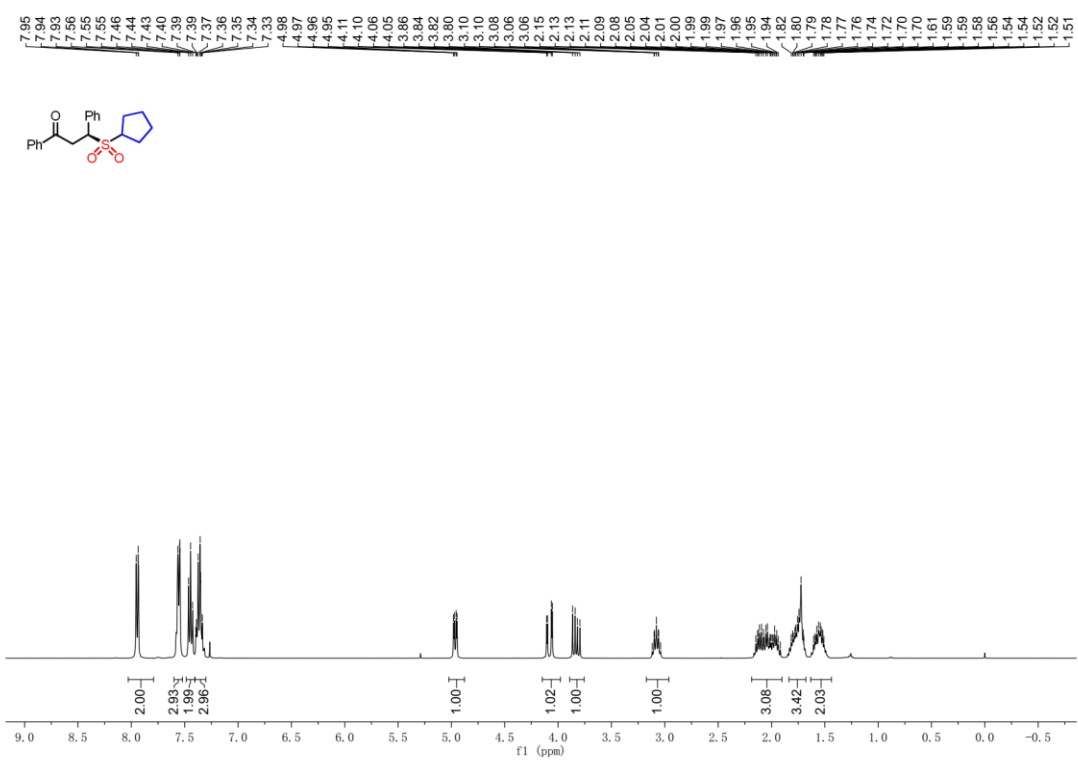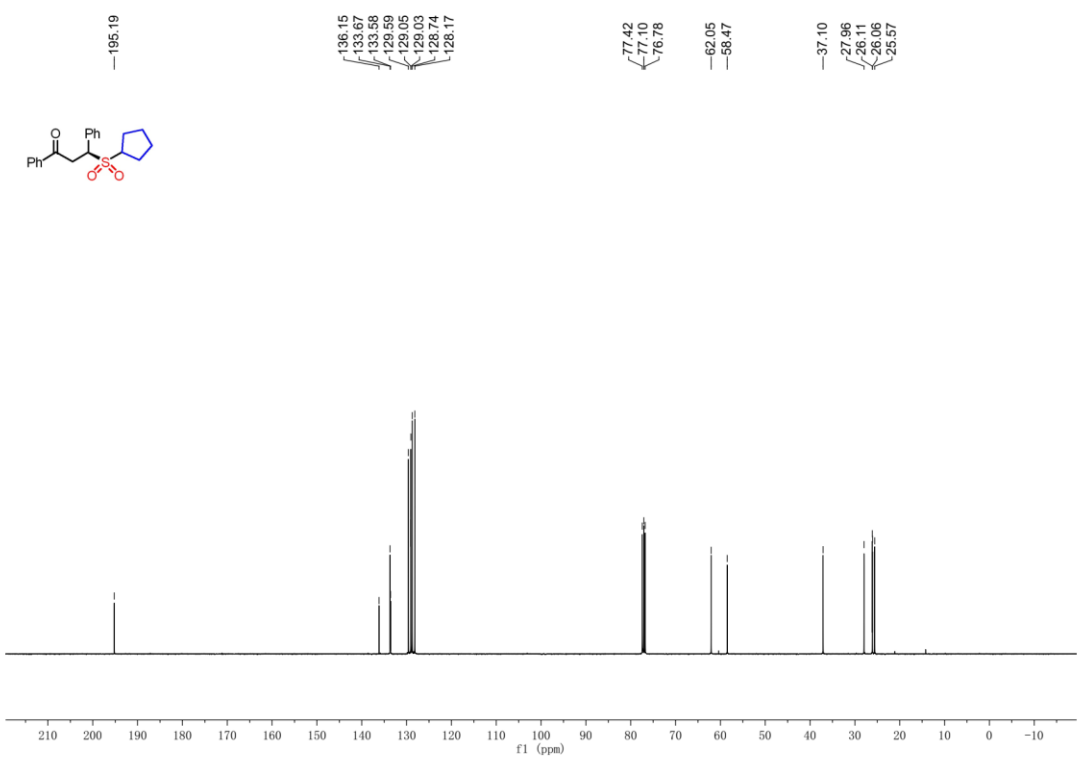



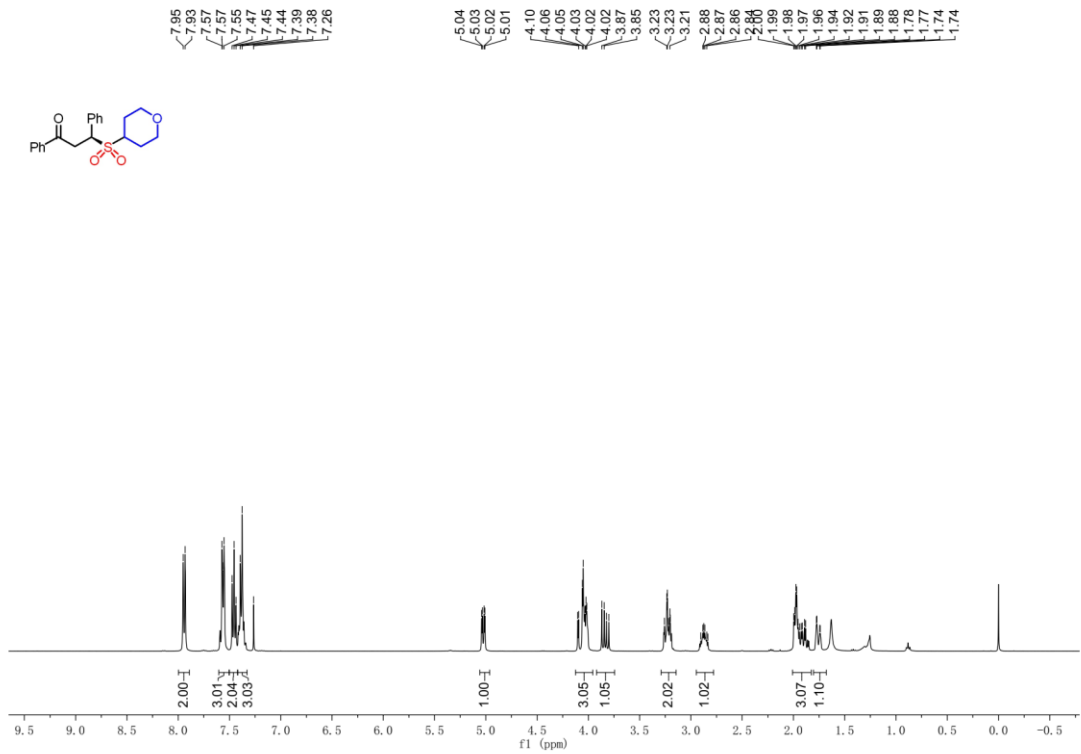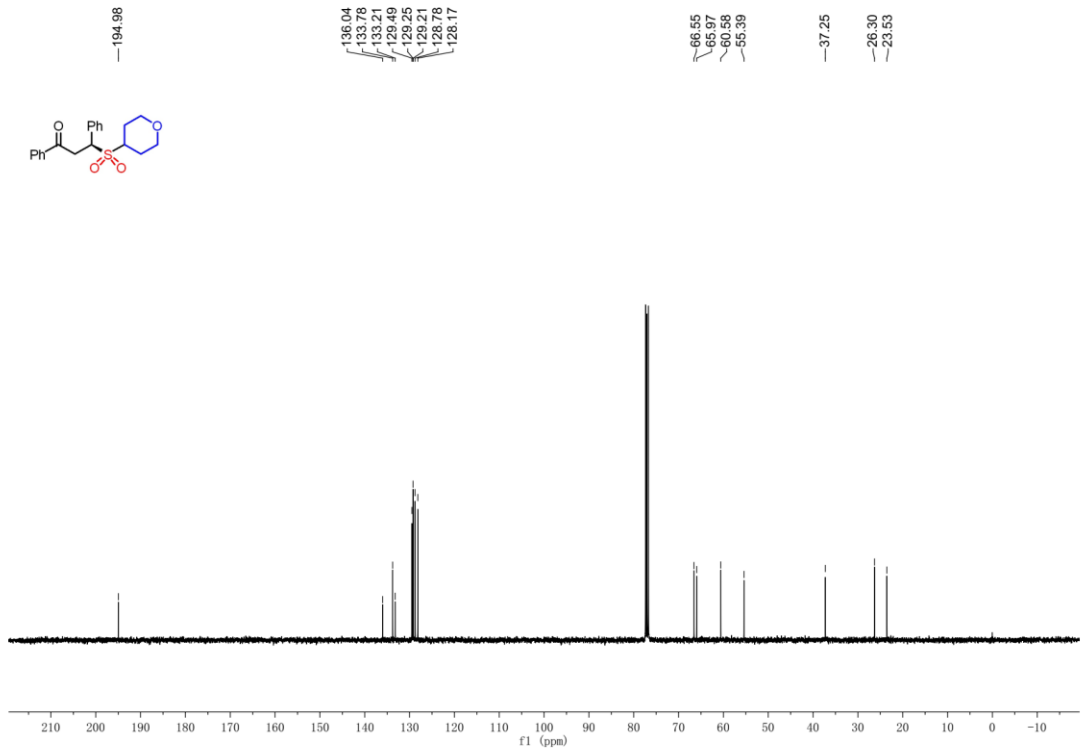

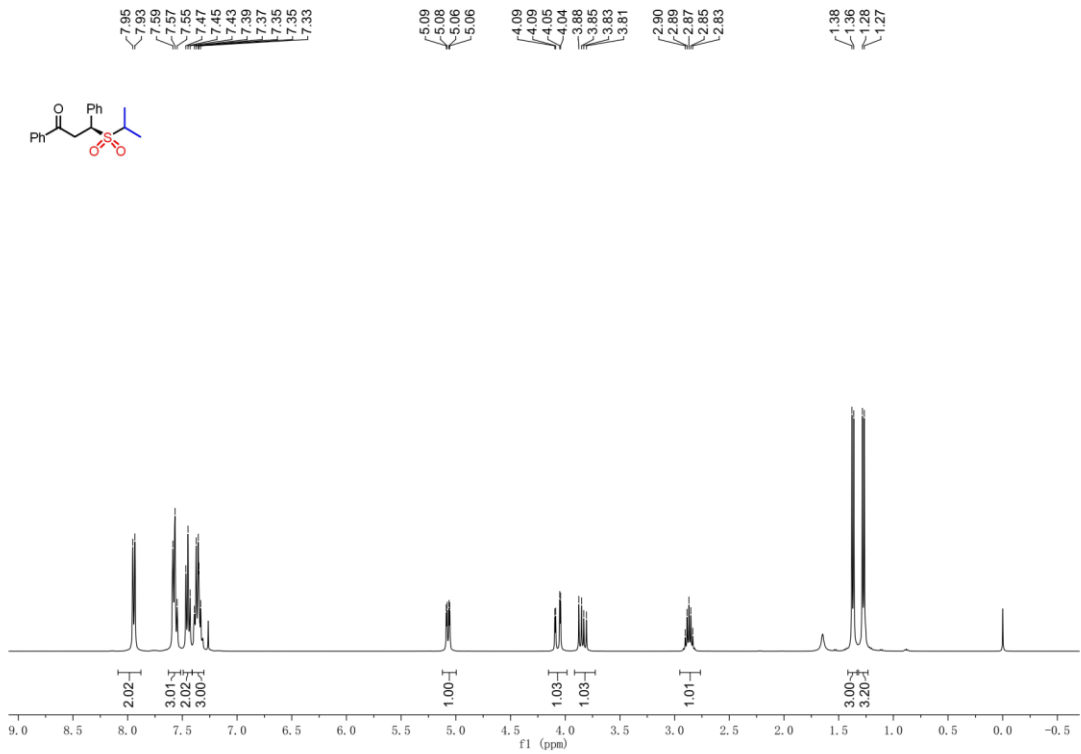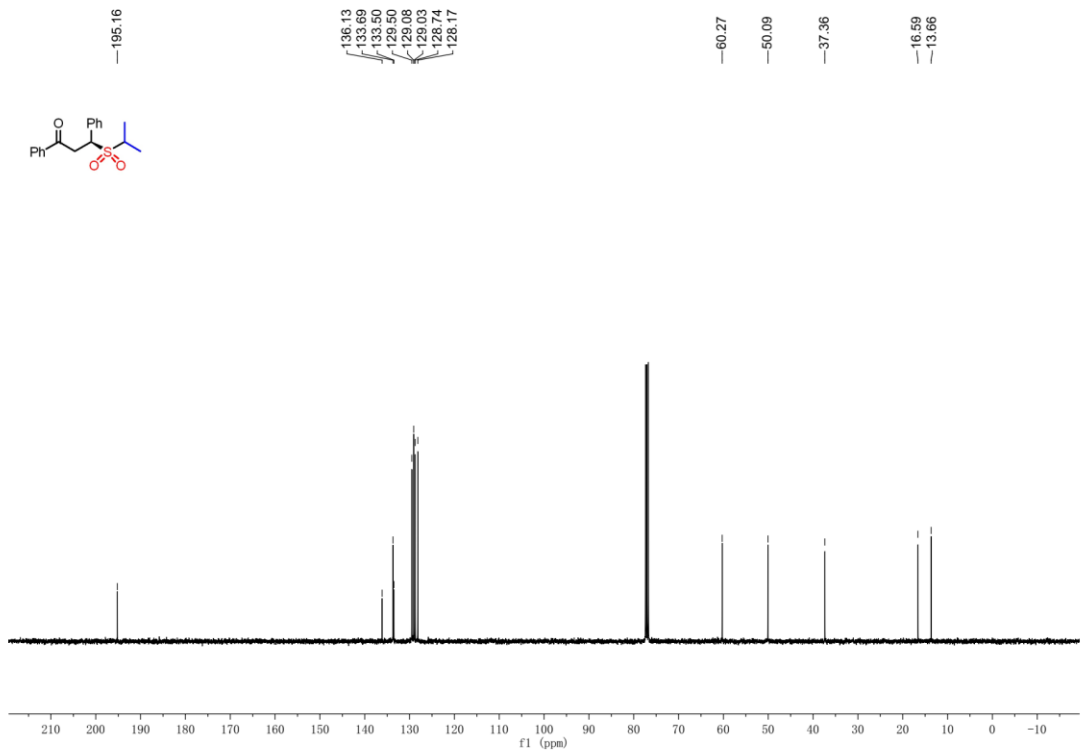

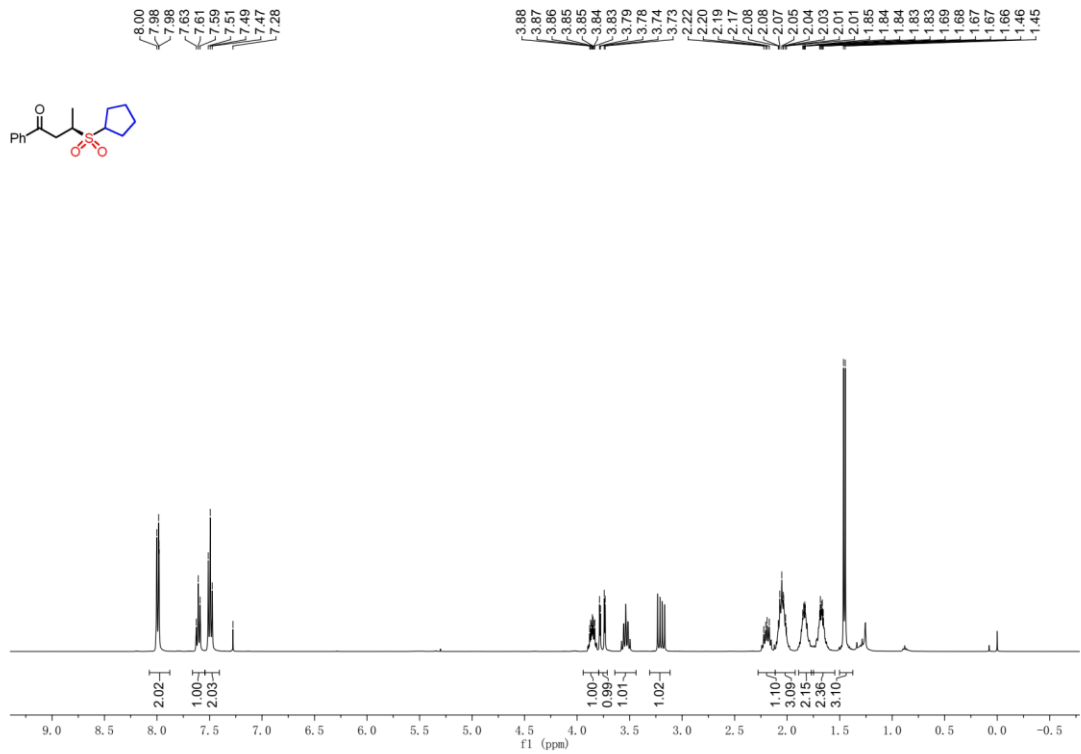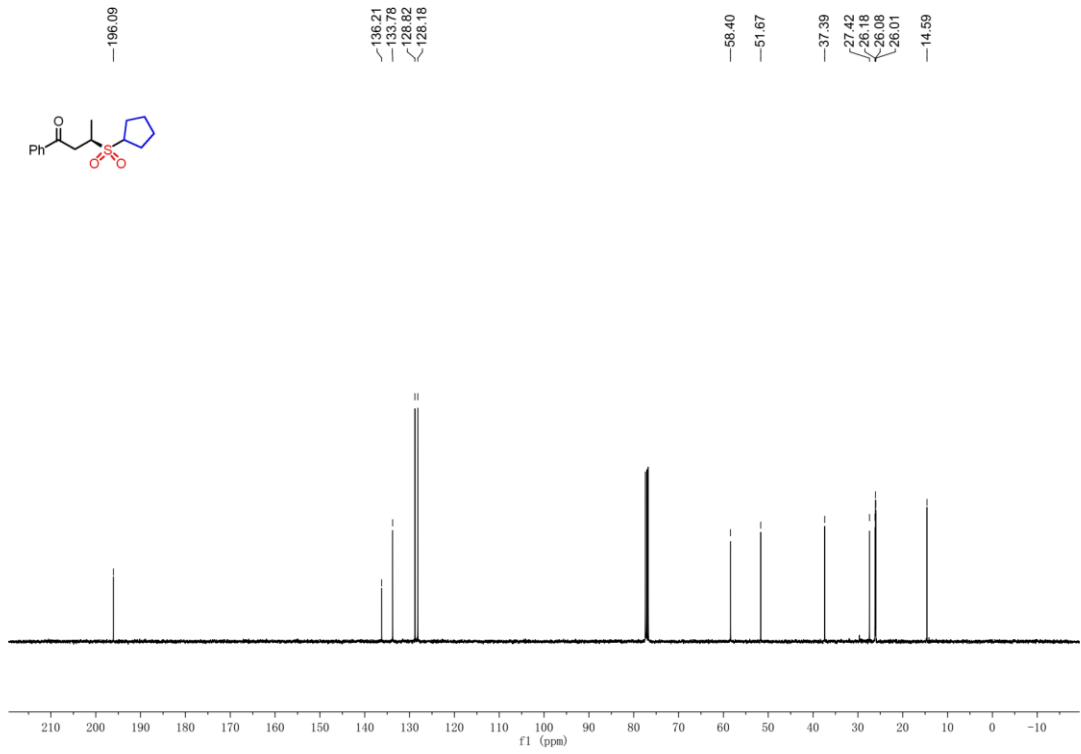

8.02  
8.00  
8.00  
7.62  
7.60  
7.58  
7.51  
7.47  
3.90  
3.88  
3.85  
3.84  
3.77  
3.77  
3.75  
3.73  
3.73  
3.33  
3.31  
3.30  
3.30  
3.29  
3.26  
3.25  
2.26  
2.24  
2.22  
2.09  
2.07  
2.05  
2.03  
2.02  
2.00  
1.99  
1.98  
1.97  
1.96  
1.84  
1.82  
1.81  
1.67  
1.66  
1.64  
1.24  
1.23  
1.22  
1.22  
1.21  
1.20  
0.88  
0.85  
0.81  
0.81  
0.80  
0.64  
0.63  
0.62  
0.61  
0.59  
0.57  
0.56  
0.55  
0.54  
0.43  
0.42  
0.41  
0.40

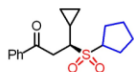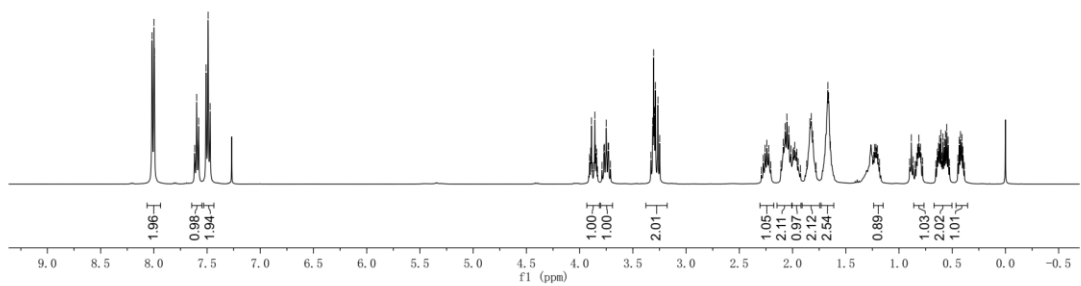

196.32

136.37  
133.60  
128.77  
128.32

60.73  
59.18

36.70  
28.01  
26.23  
25.20  
25.85

11.96  
6.48  
3.68

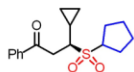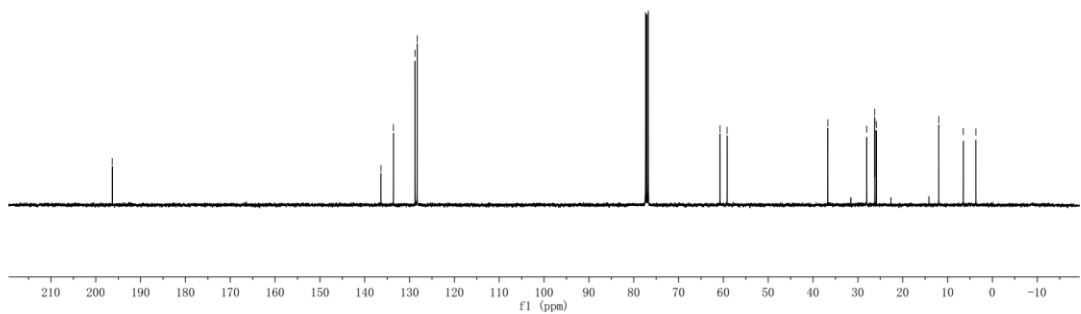

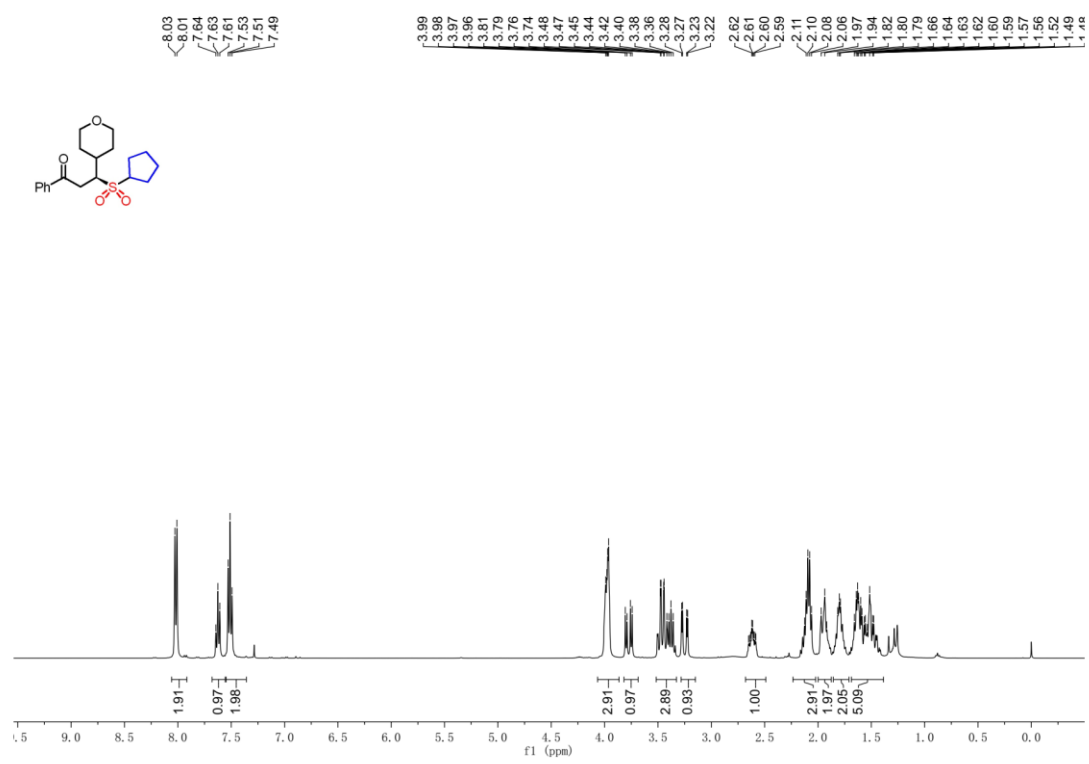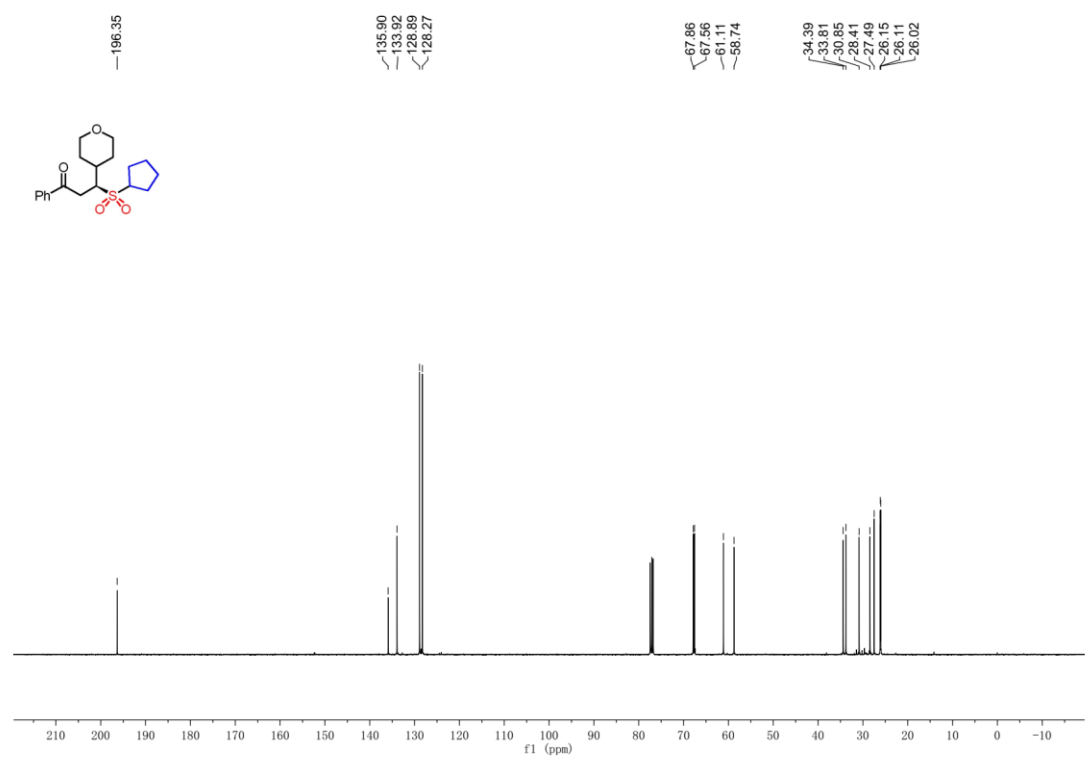

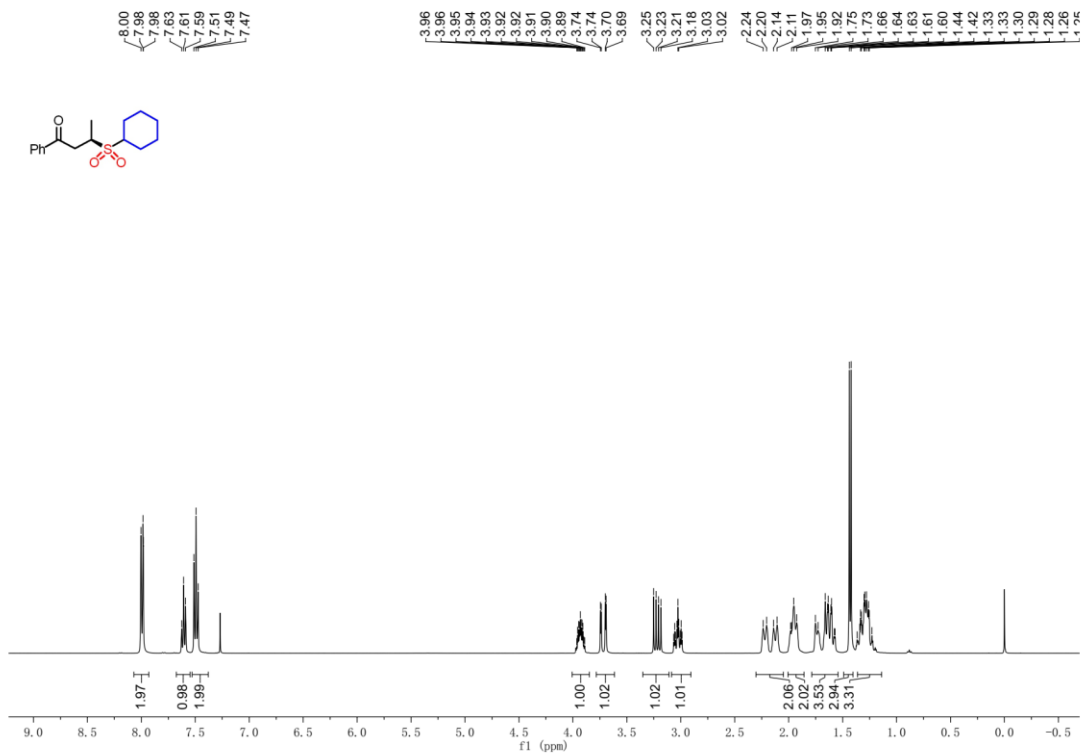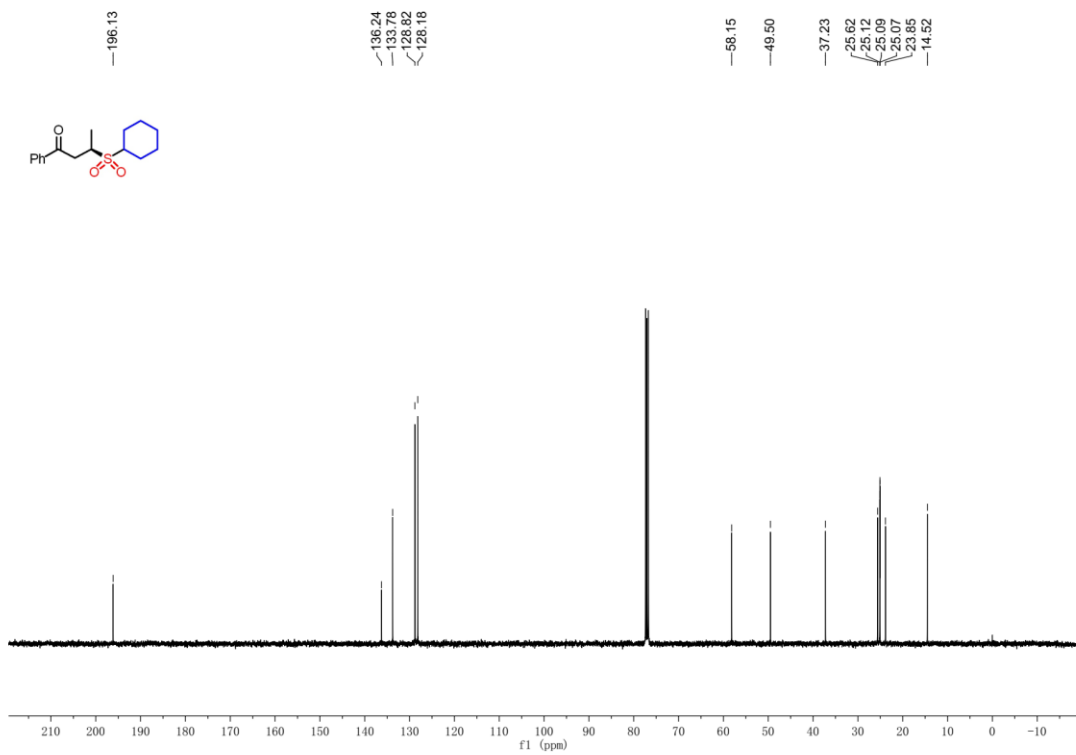

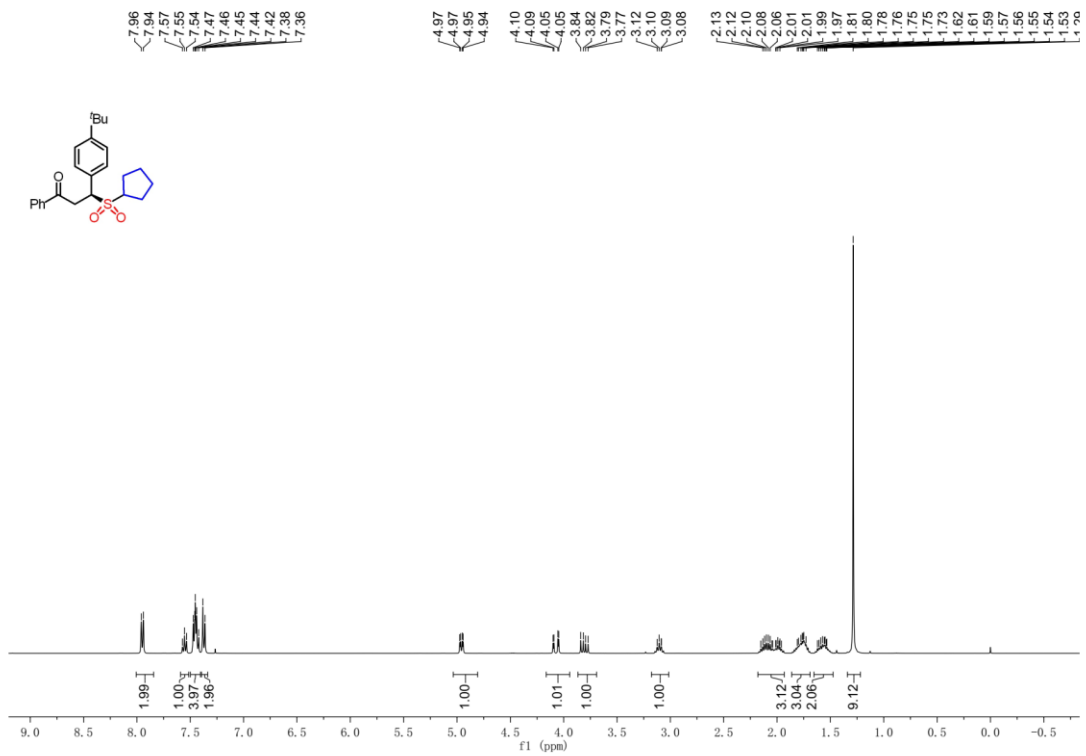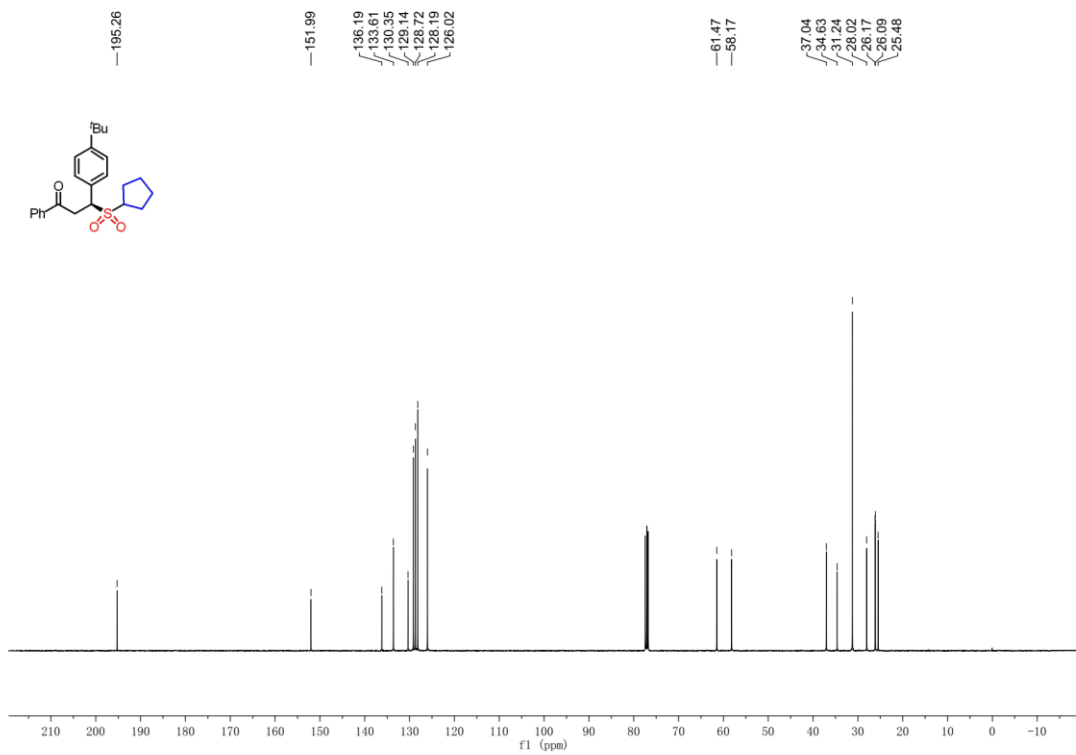

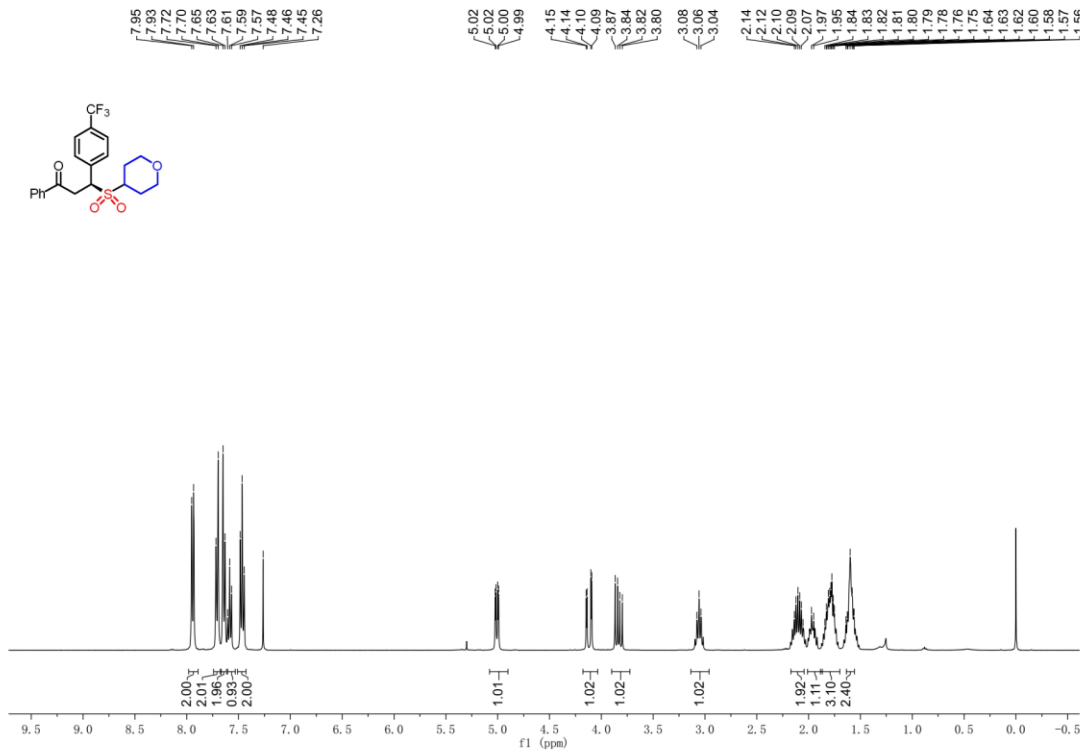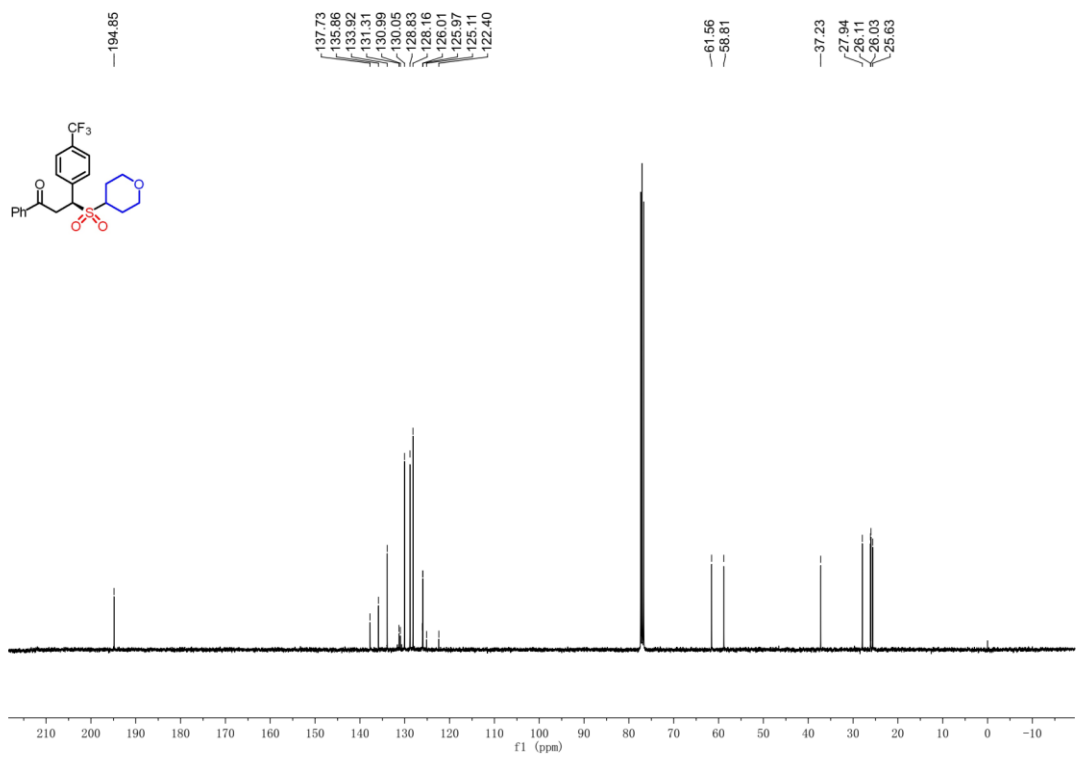



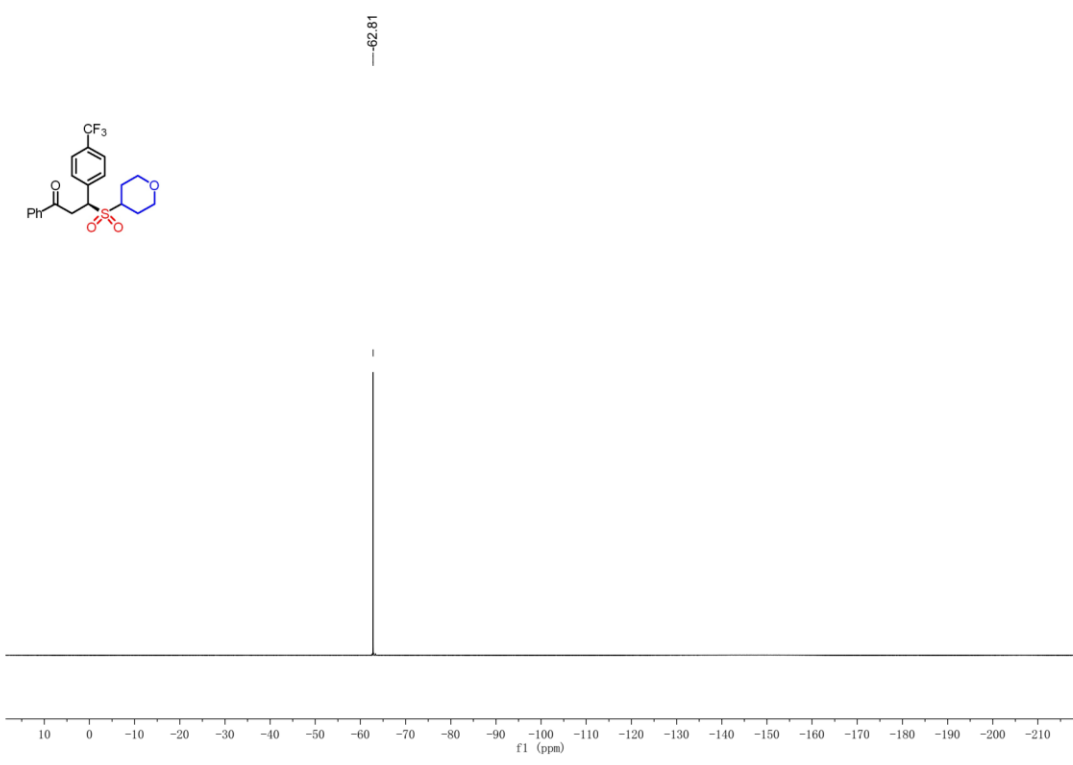

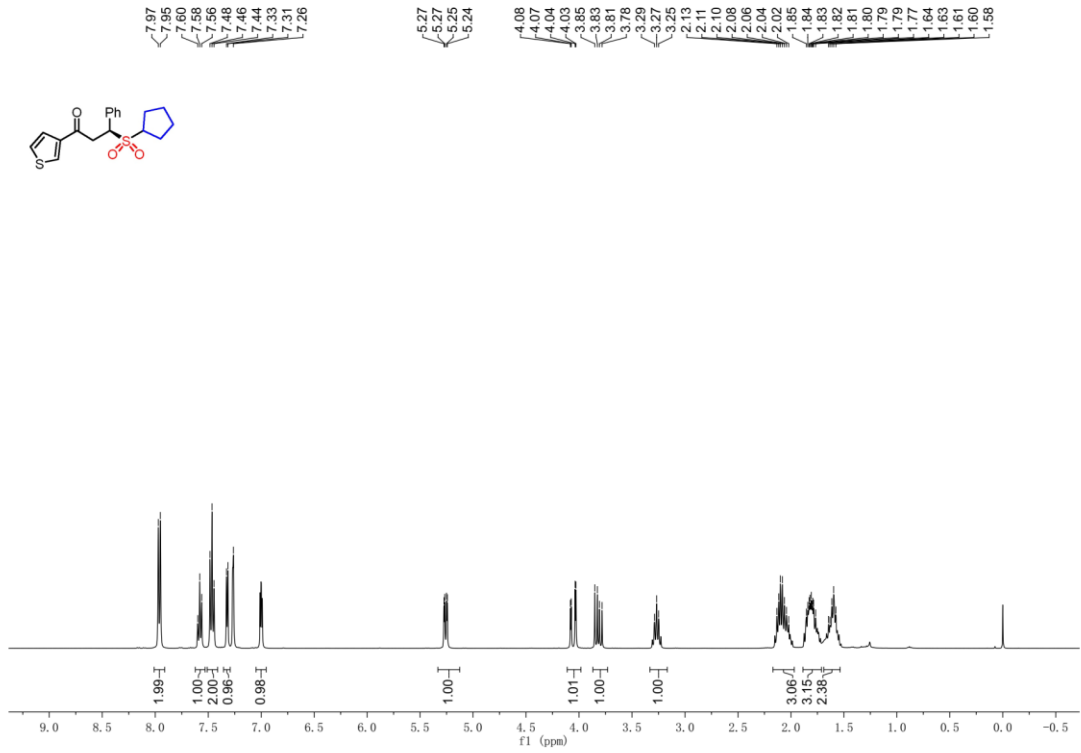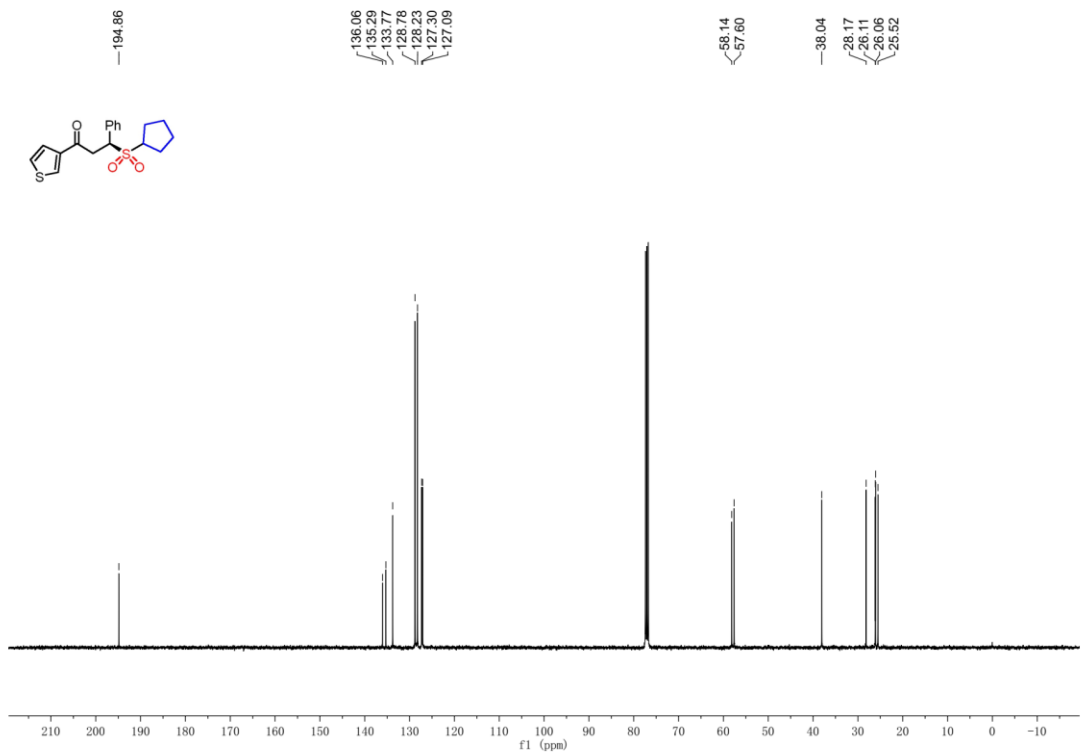

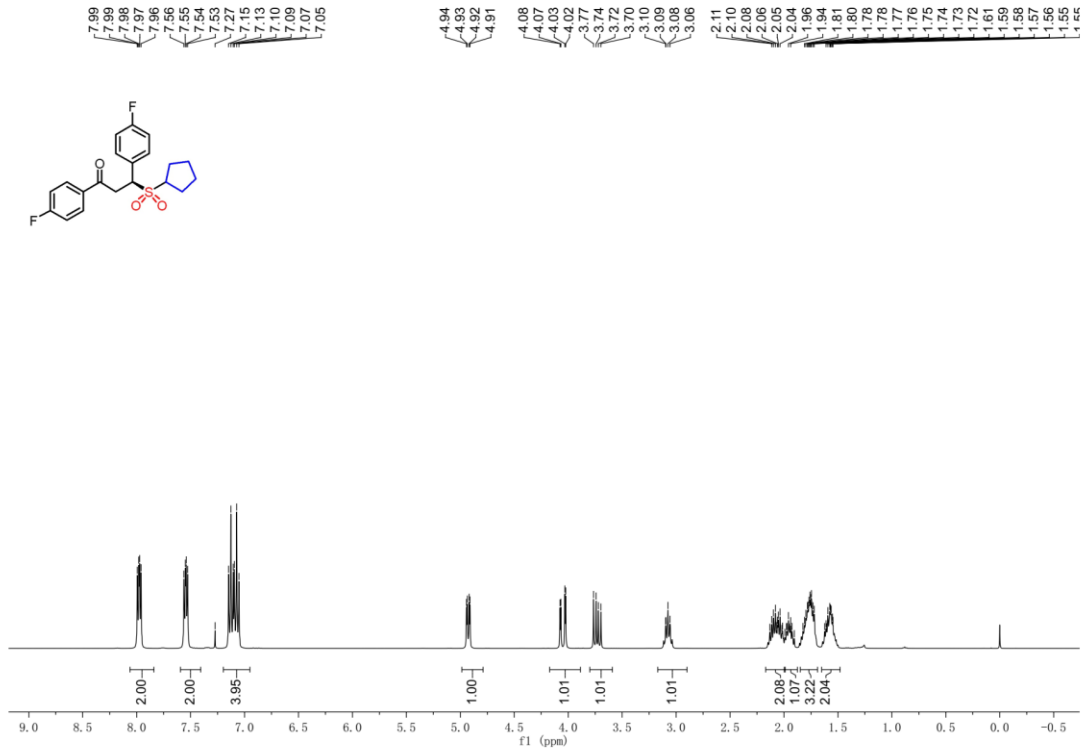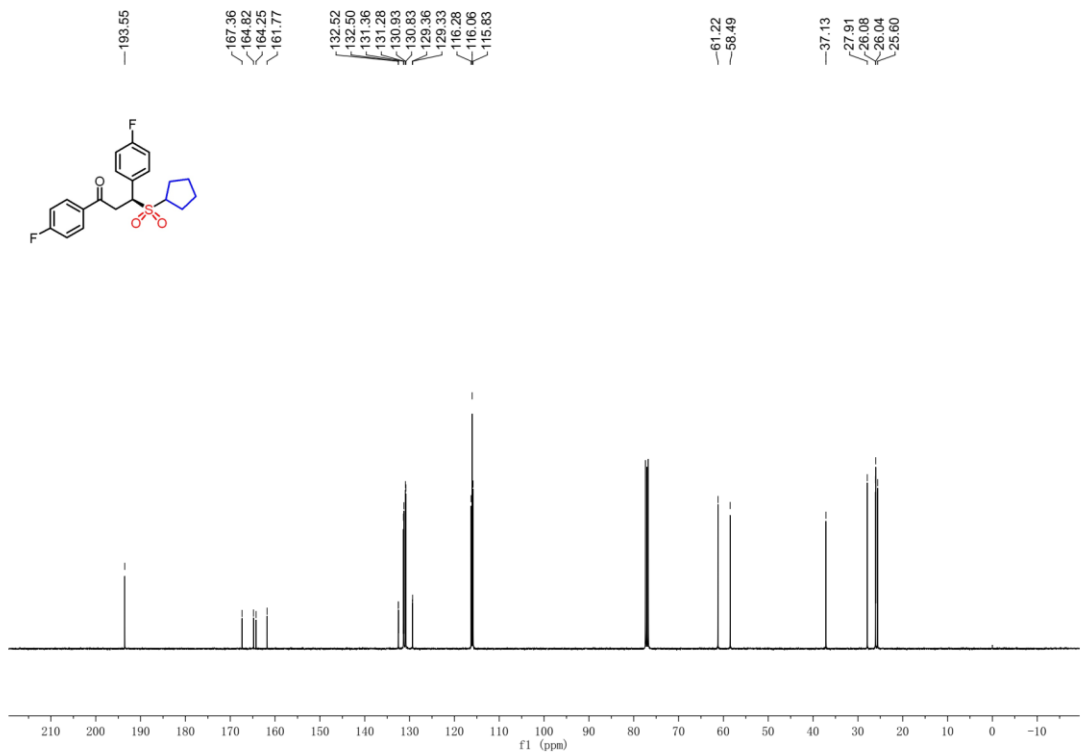



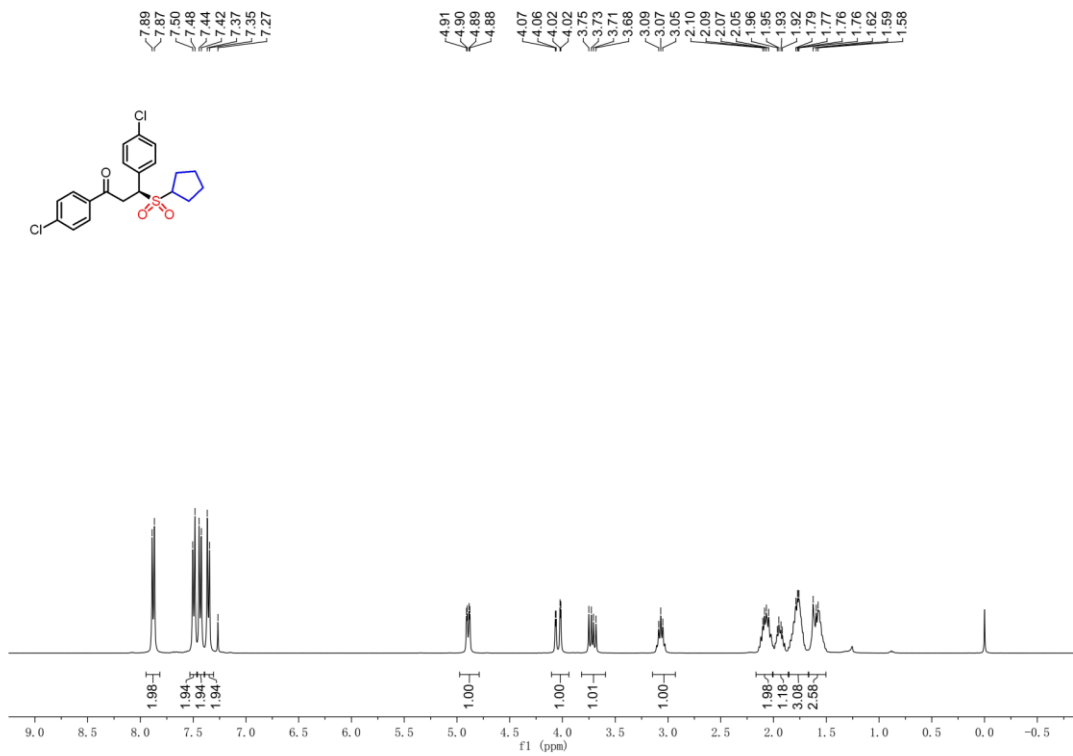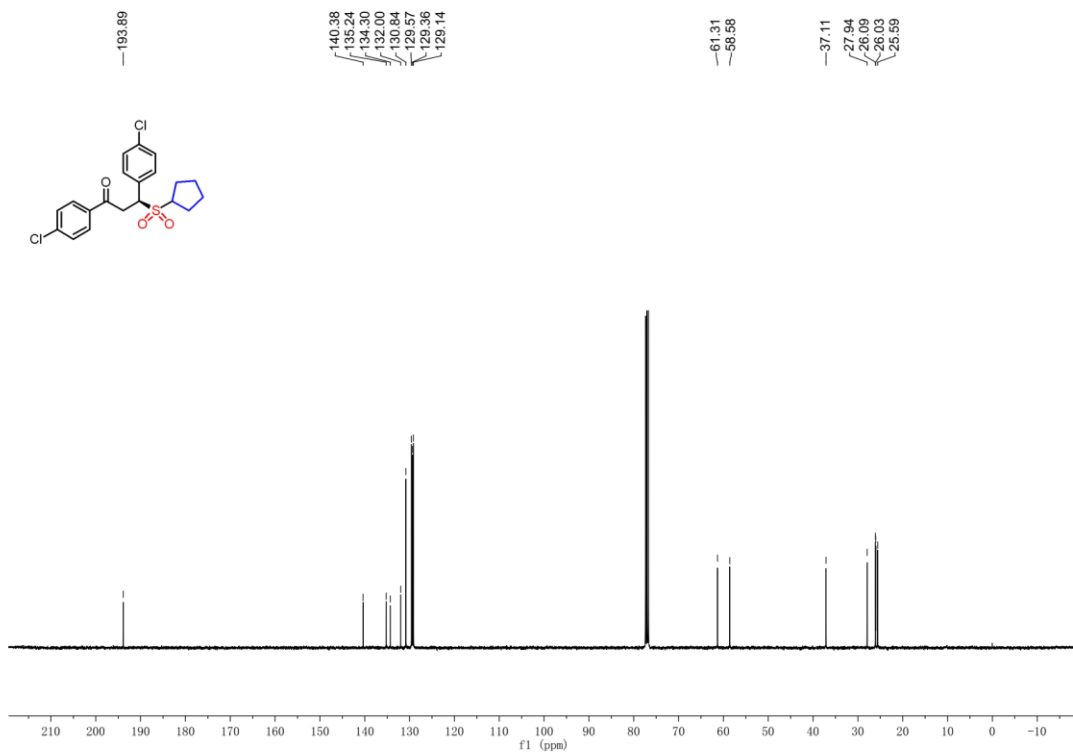

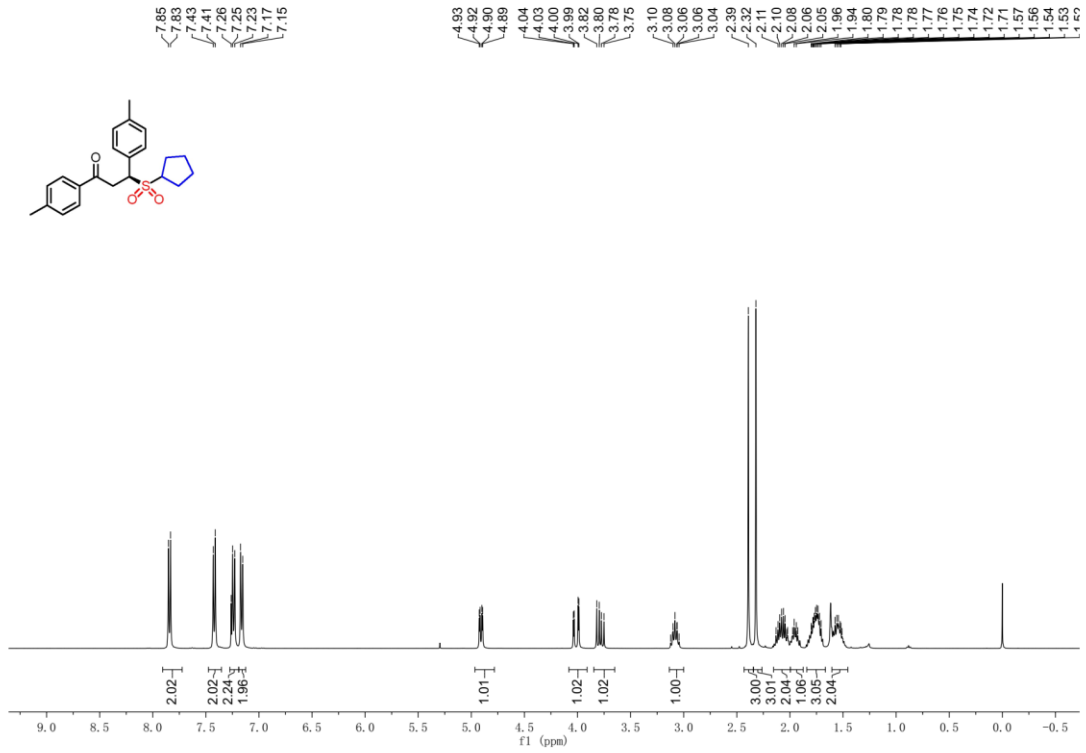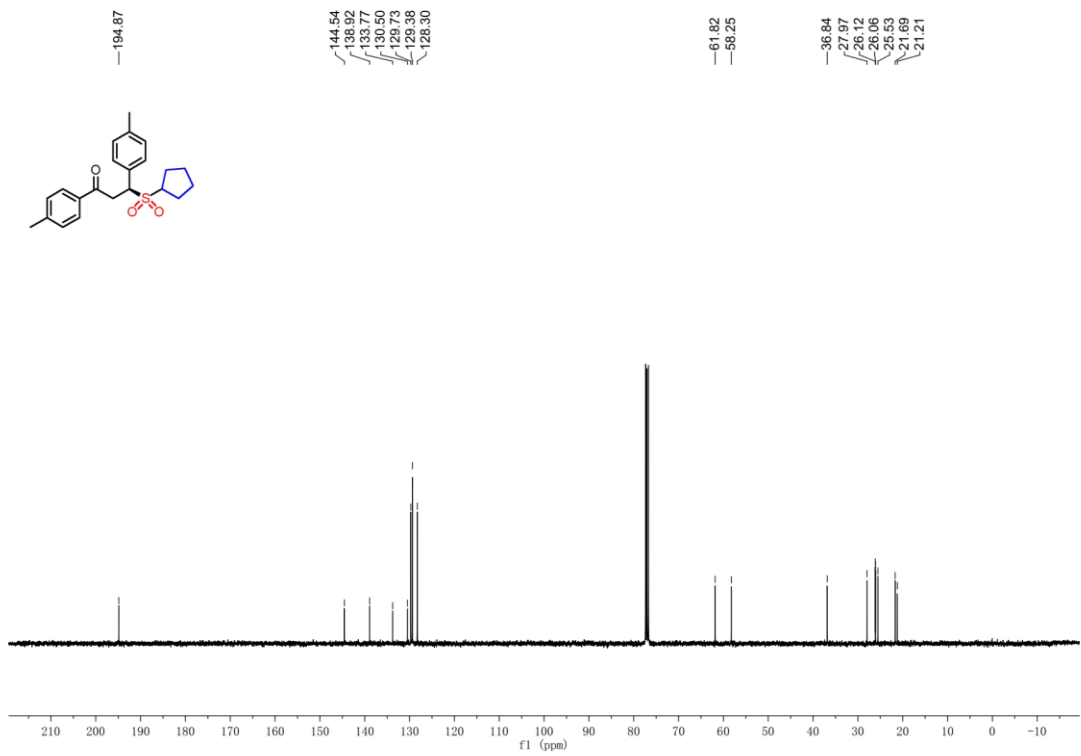

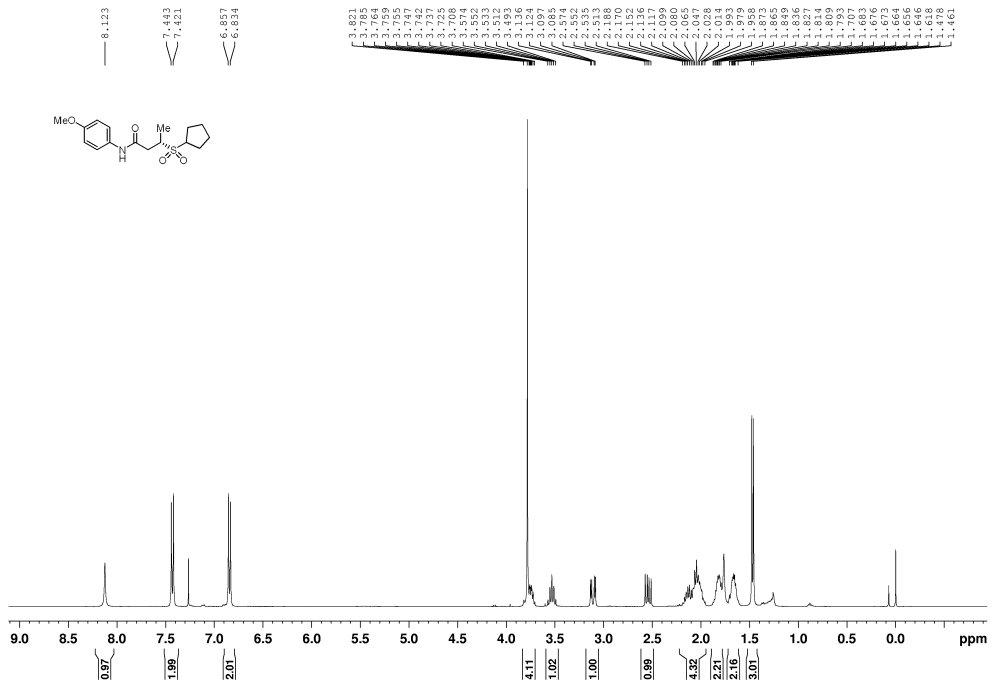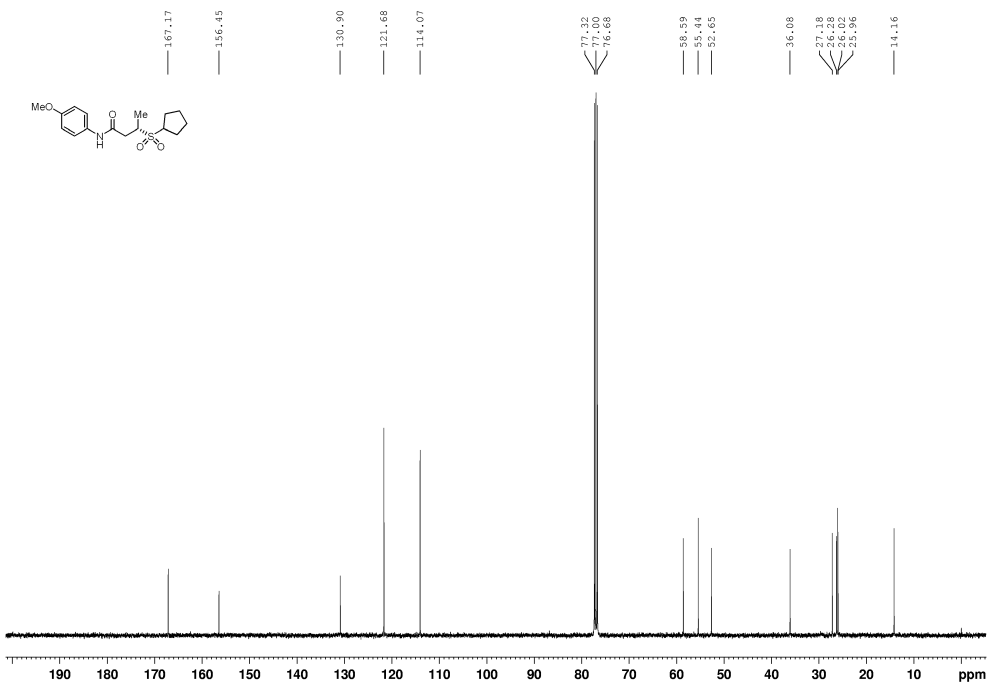

Supplement: d3qo00324h1.pdf [file d3qo00324h1.pdf]
